# Supplementary material
Source: Royal Society of Chemistry journal article supplement (doi:10.1039/d6ob00454g)

## Supporting information

### Practical and Scalable Entry to Halogenated 1,4-Thiazines Through a Domino Morin-Rearrangement/Halogenation of *N,S*-Acetals and their Arylation Based on Suzuki-Miyaura Coupling

Fanny Danton,<sup>a</sup> Kouceila Abdelli,<sup>a</sup> Mohamed Othman,<sup>a,\*</sup> Ata Martin Lawson,<sup>a</sup> Hassan Oulyadi,<sup>b</sup> Sergiu Shova,<sup>c</sup> Ján Moncol,<sup>d</sup> Alina Ghinet,<sup>e,f,g</sup> and Adam Daich<sup>a,\*†</sup>

- <sup>a</sup>. Université Le Havre Normandie, Normandie Univ, URCOM UR 3221, INC3M, FR CNRS 3038, 25 rue Philippe Lebon, BP 1123, F-76063, Le Havre Cedex, France
- <sup>b</sup>. Normandie Univ, UNIROUEN, INSA Rouen, CNRS, UMR 6014-CARMeN, F-76000 Rouen, France
- <sup>c</sup>. Petru Poni' Institute of Macromolecular Chemistry, Iasi, Romania
- <sup>d</sup>. Department of Inorganic Chemistry, Faculty of Chemical and Food Technology, Slovak University of Technology, SK-81237 Bratislava, Slovakia
- <sup>e</sup>. Univ. Lille, Inserm, CHU Lille, Institut Pasteur de Lille, UMR 1167 – RID-AGE – Risk Factors and Molecular Determinants of Aging-Related Diseases, F-59000 Lille, France
- <sup>f</sup>. Faculty of Chemistry, 'Al. I. Cuza' University of Iasi, B-dul Carol I, Nr. 11, Corp A, Ro-700506, Iasi, Romania
- <sup>g</sup>. Laboratoire de Chimie Durable et Santé, JUNIA, 16 rue Colson, F-59000 Lille Cedex, France

†Corresponding author

Phone (+0033) 232-744-403,  
E-mail: [adam.daich@univ-lehavre.fr](mailto:adam.daich@univ-lehavre.fr),  
ORCID: Adam Daich 0000-0002-6942-0519

## Table of contents

|                                                                                                                                                                                                                                      |           |
|--------------------------------------------------------------------------------------------------------------------------------------------------------------------------------------------------------------------------------------|-----------|
| <b>I. Full Experimental Details.</b>                                                                                                                                                                                                 | <b>3</b>  |
| General remarks                                                                                                                                                                                                                      | 3         |
| <b>II. General procedure for the synthesis of <i>N,S</i>-acetals as starting materials.</b>                                                                                                                                          | <b>3</b>  |
| Synthesis of 9 <i>b</i> -Methyl-2,3-dihydrothiazolo[2,3- <i>a</i> ]isoindol-5(9 <i>bH</i> )-one ( <b>4a</b> )                                                                                                                        | 3         |
| Synthesis of ethyl 9 <i>b</i> -methyl-5-oxo-2,3,5,9 <i>b</i> -tetrahydrothiazolo[2,3- <i>a</i> ]isoindole-3-carboxylate ( <b>4b</b> )                                                                                                | 3         |
| Synthesis of 1-(2-Methyl-2-phenylthiazolidin-3-yl)ethanone ( <b>4c</b> )                                                                                                                                                             | 4         |
| Step 1. Synthesis of 2-Methyl-2-phenylthiazolidine ( <b>4c'</b> )                                                                                                                                                                    | 4         |
| 2-Methyl-2-phenylthiazolidine ( <b>4c'</b> )                                                                                                                                                                                         | 5         |
| Step 2. Synthesis of 1-(2-Methyl-2-phenylthiazolidin-3-yl)ethanone ( <b>4c</b> )                                                                                                                                                     | 5         |
| 1-(2-Methyl-2-phenylthiazolidin-3-yl)ethanone ( <b>4c</b> )                                                                                                                                                                          | 5         |
| <b>III. General procedure for the synthesis of iodothiazine compounds 7(a-c)A.</b>                                                                                                                                                   | <b>5</b>  |
| 1-Iodo-3,4-dihydro-6 <i>H</i> -[1,4]thiazino[3,4- <i>a</i> ]isoindol-6-one ( <b>7aA</b> )                                                                                                                                            | 6         |
| Ethyl ( <i>R</i> )-1-Iodo-6-oxo-3,4-dihydro-6 <i>H</i> -[1,4]thiazino[3,4- <i>a</i> ]isoindole-4-carboxylate ( <b>7bA</b> )                                                                                                          | 7         |
| 1-(6-Iodo-5-phenyl-2,3-dihydro-4 <i>H</i> -1,4-thiazin-4-yl)ethan-1-one ( <b>7cA</b> )                                                                                                                                               | 7         |
| 3 <i>H</i> -[1,4]Thiazino[3,4- <i>a</i> ]isoindol-6(4 <i>H</i> )-one ( <b>5a</b> )                                                                                                                                                   | 7         |
| Ethyl 6-oxo-4,6-dihydro-3 <i>H</i> -[1,4]thiazino[3,4- <i>a</i> ]isoindole-4-carboxylate ( <b>5b</b> )                                                                                                                               | 8         |
| 1-(5-Phenyl-2 <i>H</i> -1,4-thiazin-4(3 <i>H</i> )-yl)ethanone ( <b>5c</b> )                                                                                                                                                         | 8         |
| <b>IV. General procedure for the synthesis of bromothiazine compounds 7(a-c)B.</b>                                                                                                                                                   | <b>8</b>  |
| 1-Bromo-3,4-dihydro-6 <i>H</i> -[1,4]thiazino[3,4- <i>a</i> ]isoindol-6-one ( <b>7aB</b> )                                                                                                                                           | 9         |
| Ethyl ( <i>R</i> )-1-bromo-6-oxo-3,4-dihydro-6 <i>H</i> -[1,4]thiazino[3,4- <i>a</i> ]isoindole-4-carboxylate ( <b>7bB</b> )                                                                                                         | 9         |
| 1-(6-Bromo-5-phenyl-2,3-dihydro-4 <i>H</i> -1,4-thiazin-4-yl)ethan-1-one ( <b>7cB</b> )                                                                                                                                              | 10        |
| <b>V. General procedure for the synthesis of chlorothiazine compounds 7(a-c)C.</b>                                                                                                                                                   | <b>10</b> |
| 1-Chloro-3,4-dihydro-6 <i>H</i> -[1,4]thiazino[3,4- <i>a</i> ]isoindol-6-one ( <b>7aC</b> )                                                                                                                                          | 10        |
| Ethyl ( <i>R</i> )-1-chloro-6-oxo-3,4-dihydro-6 <i>H</i> -[1,4]thiazino[3,4- <i>a</i> ]isoindole-4-carboxylate ( <b>7bC</b> )                                                                                                        | 11        |
| 1-(6-Chloro-5-phenyl-2,3-dihydro-4 <i>H</i> -1,4-thiazin-4-yl)ethan-1-one ( <b>7cC</b> )                                                                                                                                             | 11        |
| <b>VI. General procedure for the synthesis of 3,4-dihydro-6<i>H</i>-pyrrolo[2,1-<i>c</i>][1,4]thiazin-6-one (<b>9</b>) and 8-bromo-3,4-dihydro-6<i>H</i>-pyrrolo[2,1-<i>c</i>][1,4]thiazin-6-one (<b>7dB</b>).</b>                   | <b>11</b> |
| Step 1: 7 <i>a</i> -Methyltetrahydropyrrolo[2,1- <i>b</i> ]thiazol-5(6 <i>H</i> )-one ( <b>4d</b> )                                                                                                                                  | 11        |
| 7,8-Dihydro-3 <i>H</i> -pyrrolo[2,1- <i>c</i> ][1,4]thiazin-6(4 <i>H</i> )-one ( <b>9</b> ): Morin product                                                                                                                           | 12        |
| 3,4-Dihydro-6 <i>H</i> -pyrrolo[2,1- <i>c</i> ][1,4]thiazin-6-one ( <b>10</b> ): Oxidized Morin product                                                                                                                              | 12        |
| 8-Bromo-3,4-dihydro-6 <i>H</i> -pyrrolo[2,1- <i>c</i> ][1,4]thiazin-6-one ( <b>7dB</b> )                                                                                                                                             | 13        |
| <b>VII. General procedure for the synthesis of 3,4-dihydro-6<i>H</i>-pyrrolo[2,1-<i>c</i>][1,4]thiazin-6-ones (<b>8a-k</b>) by the Suzuki-Miyaura coupling of halogenated substrate 7aB and boronic acids or esters (<b>16</b>).</b> | <b>13</b> |
| 1-Phenyl-3 <i>H</i> -[1,4]thiazino[3,4- <i>a</i> ]isoindol-6(4 <i>H</i> )-one ( <b>8a</b> )                                                                                                                                          | 13        |
| 1-(4-( <i>Tert</i> -butyl)phenyl)-3,4-dihydro-6 <i>H</i> -[1,4]thiazino[3,4- <i>a</i> ]isoindol-6-one ( <b>8b</b> )                                                                                                                  | 14        |
| 1-(4-Methoxyphenyl)-3,4-dihydro-6 <i>H</i> -[1,4]thiazino[3,4- <i>a</i> ]isoindol-6-one ( <b>8c</b> )                                                                                                                                | 14        |
| 1-(3,4,5-Trimethoxyphenyl)-3,4-dihydro-6 <i>H</i> -[1,4]thiazino[3,4- <i>a</i> ]isoindol-6-one ( <b>8d</b> )                                                                                                                         | 14        |
| 1-(4-Nitrophenyl)-3,4-dihydro-6 <i>H</i> -[1,4]thiazino[3,4- <i>a</i> ]isoindol-6-one ( <b>8e</b> )                                                                                                                                  | 15        |
| 1-([1,1'-Biphenyl]-4-yl)-3,4-dihydro-6 <i>H</i> -[1,4]thiazino[3,4- <i>a</i> ]isoindol-6-one ( <b>8f</b> )                                                                                                                           | 15        |
| Methyl 4-(6-oxo-3,4-dihydro-6 <i>H</i> -[1,4]thiazino[3,4- <i>a</i> ]isoindol-1-yl)benzoate ( <b>8g</b> )                                                                                                                            | 16        |
| 1-(Naphthalen-1-yl)-3,4-dihydro-6 <i>H</i> -[1,4]thiazino[3,4- <i>a</i> ]isoindol-6-one ( <b>8h</b> )                                                                                                                                | 17        |
| 1-(Pyren-4-yl)-3,4-dihydro-6 <i>H</i> -[1,4]thiazino[3,4- <i>a</i> ]isoindol-6-one ( <b>8i</b> )                                                                                                                                     | 17        |
| 1-(1-Methyl-1 <i>H</i> -indol-5-yl)-3,4-dihydro-6 <i>H</i> -[1,4]thiazino[3,4- <i>a</i> ]isoindol-6-one ( <b>8k</b> )                                                                                                                | 18        |
| 1-(6-Chloropyridin-2-yl)-3,4-dihydro-6 <i>H</i> -[1,4]thiazino[3,4- <i>a</i> ]isoindol-6-one ( <b>8l</b> )                                                                                                                           | 19        |
| <b>VIII. General procedure for the synthesis of 3,4-dihydro-6<i>H</i>-pyrrolo[2,1-<i>c</i>][1,4]thiazin-6-ones (<b>8m-o</b>) by the Suzuki-Miyaura coupling of halogenated substrates 7(b-d)B and boronic acid 16a.</b>              | <b>19</b> |
| Ethyl ( <i>R</i> )-6-oxo-1-phenyl-3,4-dihydro-6 <i>H</i> -[1,4]thiazino[3,4- <i>a</i> ]isoindole-4-carboxylate ( <b>8m</b> )                                                                                                         | 19        |
| 1-(5,6-Diphenyl-2,3-dihydro-4 <i>H</i> -1,4-thiazin-4-yl)ethan-1-one ( <b>8n</b> )                                                                                                                                                   | 20        |
| 8-Phenyl-3,4-dihydro-6 <i>H</i> -pyrrolo[2,1- <i>c</i> ][1,4]thiazin-6-one ( <b>8o</b> )                                                                                                                                             | 20        |
| <b>IX. Synthesis of 1-(2-oxopyrrolidin-1-yl)-3,4-dihydro-6<i>H</i>-[1,4]thiazino[3,4-<i>a</i>]isoindol-6-one (<b>8r</b>)</b>                                                                                                         | <b>20</b> |
| <b>X. Copies of NMR spectra</b>                                                                                                                                                                                                      | <b>22</b> |
| <b>XI. Structural crystallographic data</b>                                                                                                                                                                                          | <b>57</b> |

## II. Full Experimental Details.

### General remarks

Unless otherwise specified, reagents and starting materials were purchased from commercial sources and were used without further purification. Reactions were carried out in standard glassware. NMR spectra were recorded at room temperature on a Bruker Advance 300 spectrometer ( $^1\text{H}$ : 300 MHz,  $^{13}\text{C}$ : 75 MHz) in deuterated chloroform ( $\text{CDCl}_3$ ), deuterated acetonitrile ( $\text{CD}_3\text{CN}$ ) or deuterated dimethyl sulfoxide ( $\text{C}_2\text{D}_6\text{OS}$ ) using TMS as internal standard ( $\delta = 0$ ). High resolution ESI mass spectra were measured on 6530 Q-TOF Agilent System spectrometer. Separation procedure was carried out using Interchim Puriflash 430 System equipped with UV detector. Silicon dioxide ( $\text{SiO}_2$ ) (30 to 50  $\mu\text{m}$ ) from Macherey-Nagel was used as the solid phase and a mixture of cyclohexane / ethyl acetate or dichloromethane / methanol has served as eluent. Melting points were recorded on a Stuart Scientific analyzer SMP 10 apparatus and are uncorrected. Infrared spectra were performed as neat on Perkin Elmer FT-IR spectrophotometer and only broad or strong signals are reported. Specific rotations were measured on a Jasco P-2000 polarimeter for compounds never described before.

### II. General procedure for the synthesis of *N,S*-acetals as starting materials.

#### Synthesis of 9*b*-Methyl-2,3-dihydrothiazolo[2,3-*a*]isoindol-5(9*bH*)-one (4a)

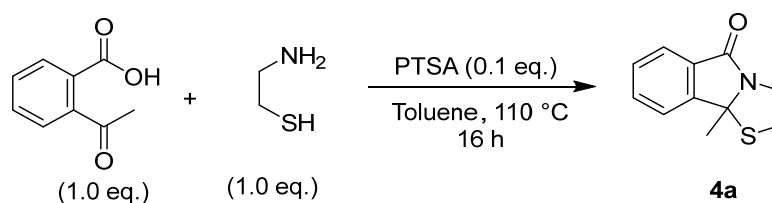

To a previously stirred solution of 2-acetylbenzoic acid (2.00 g, 12.2 mmol, 1.0 eq.) and *p*-toluene-sulfonic acid monohydrate (PTSA, 230 mg, 1.22 mmol, 0.1 eq.) in toluene (60 mL), was added the aminothiol (1.11 g, 14.4 mmol, 1.2 eq.) and the mixture was heated at 110 °C for 16 h. After cooling at room temperature, the solvent was evaporated under reduced pressure and purification on flash chromatography (*Silica 60*) was performed to get 2.02 g (84%) of the corresponding *N,S*-acetal **4a**.

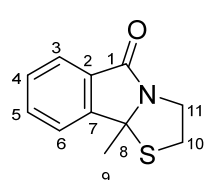

White solid,  $R_f = 0.40$ , eluent (ethyl acetate / cyclohexane = 3/7), mp = 64–66 °C, 2.00 g scale reaction (in 60 mL of toluene), 2.02 g was isolated, 84% yield.

**IR** ( $\nu_{\text{max}} / \text{cm}^{-1}$ ): 1698, 1347, 740, 698.

**$^1\text{H}$  NMR (300 MHz,  $\text{CDCl}_3$ )**:  $\delta$  7.76 (dt,  $J = 7.4, 1.0$  Hz, 1H), 7.65 – 7.53 (m, 1H), 7.47 (ddd,  $J = 8.4, 7.5, 1.7$  Hz, 2H), 4.65 – 4.48 (m, 1H), 3.56 – 3.22 (m, 3H), 1.91 (s, 3H).

**$^{13}\text{C}$  NMR (75 MHz,  $\text{CDCl}_3$ )**:  $\delta_c$  170.6, 150.7, 133.1, 129.3, 129.0, 124.4, 121.8, 75.7, 43.3, 37.8, 28.8.

**HRMS (ESI $^+$ )**: Calcd for  $\text{C}_{11}\text{H}_{12}\text{NOS}$  [ $\text{M}+\text{H}$ ] $^+$  206.0634, found 206.0655.

The synthesis of this product was reported in the following reference: F. Danton, M. Othman, A. M. Lawson, J. Moncol, A. Ghinet, B. Rigo, A. Daïch, *Chem. Eur. J.* **2019**, *25*, 6113–6118.

#### Synthesis of ethyl 9*b*-methyl-5-oxo-2,3,5,9*b*-tetrahydrothiazolo[2,3-*a*]isoindole-3-carboxylate (4b)

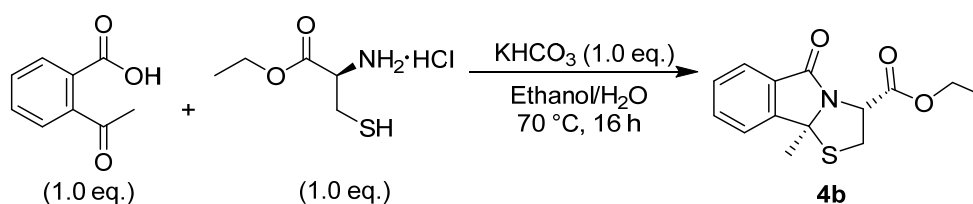

To a stirred solution of the ketoacid (2.00 g, 12.2 mmol, 1.0 eq.) in ethanol (40 mL), was added a solution of ethyl ester aminoethanthiol hydrochloride (1.67 g, 12.2 mmol, 1.0 eq.) and  $\text{KHCO}_3$  (1.22 g, 12.2 mmol, 1.0 eq.) in water (20 mL). The mixture was then heated at 70 °C for 16 h. After cooling at room temperature, the solvent was evaporated and a purification on flash chromatography was performed to get the corresponding *N,S*-acetal **4b** in 85% yield.

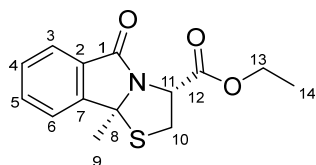

Colorless paste,  $R_f = 0.33$ , eluent (ethyl acetate / cyclohexane = 1/4), 2.00 g scale reaction (in 60 mL of toluene), 2.87 g was isolated, 85% yield.

**IR** ( $\nu_{\text{max}}$  /  $\text{cm}^{-1}$ ): 1745, 1694, 1341, 1326, 752.

**$^1\text{H}$  NMR (300 MHz,  $\text{CDCl}_3$ )**:  $\delta_{\text{H}}$  7.80 (d,  $J = 7.3$  Hz, 1H, H-3), 7.62 (td,  $J = 7.5, 1.2$  Hz, 1H, H-5), 7.56 – 7.44 (m, 2H, H-4, H-6), 5.14 (dd,  $J = 8.7, 6.4$  Hz, 1H, H-11), 4.36 – 4.22 (m, 2H, H-13), 3.93 (dd,  $J = 11.8, 6.4$  Hz, 1H, H-10), 3.82 (dd,  $J = 11.8, 8.7$  Hz, 1H, H-10), 1.96 (s, 3H, H-9), 1.33 (t,  $J = 7.1$  Hz, 3H, H-14).

**$^{13}\text{C}$  NMR (75 MHz,  $\text{CDCl}_3$ )**:  $\delta_{\text{C}}$  170.7 ( $\text{C}_{\text{qC=O}}$ , C-1), 170.5 ( $\text{C}_{\text{qC=O}}$ , C-12), 149.2 (Cq, C-7), 133.4 (Cq, C-5), 129.5 (CH, C-4), 129.2 (Cq, C-2), 124.8 (CH, C-3), 122.0 (CH, C-6), 77.4 (Cq, C-8), 62.2 ( $\text{CH}_2$ , C-13), 58.2 (CH, C-11), 40.4 ( $\text{CH}_2$ , C-10), 28.3 ( $\text{CH}_3$ , C-9), 14.3 ( $\text{CH}_3$ , C-14).

**HRMS (ESI<sup>+</sup>)**: Calcd for  $\text{C}_{14}\text{H}_{16}\text{NO}_3\text{S}$  [ $\text{M}+\text{H}$ ]<sup>+</sup> 278.0845, found 278.0875.

The synthesis of this product was reported in the following reference: F. Danton, M. Othman, A. M. Lawson, J. Moncol, A. Ghinet, B. Rigo, A. Daïch, *Chem. Eur. J.* **2019**, *25*, 6113–6118. For specific rotation, see the following reference, Allin, S. M.; Vaidya, D. G.; Page, M. I.; Slawin, A. M. Z.; Smith, T. *Tetrahedron Lett.* **2000**, *41*, 2219–2222.

## Synthesis of 1-(2-Methyl-2-phenylthiazolidin-3-yl)ethanone (**4c**)

### Step 1. Synthesis of 2-Methyl-2-phenylthiazolidine (**4c'**)

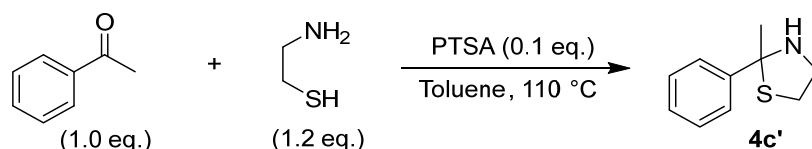

To a stirred solution of acetophenone (2.00 g, 16.6 mmol, 1.0 eq.) and PTSA (0.316 g, 1.66 mmol, 0.1 eq.) in toluene, was added the cysteamine (1.54 g, 19.9 mmol, 1.2 eq.) before heating the mixture at 110 °C for 16 h. After cooling the reaction at room temperature, the solvent was evaporated under reduced pressure and a purification on flash chromatography was performed to get the corresponding *N,S*-acetals **4c'** in 43% yield.

### 2-Methyl-2-phenylthiazolidine (**4c'**)

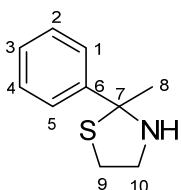

Colorless oil,  $R_f = 0.44$ , eluent (ethyl acetate / cyclohexane = 1/4), 2.00 g scale reaction (in 60 mL of toluene), 1.28 g was isolated, 43% yield.

**IR** ( $\nu_{\text{max}}$  /  $\text{cm}^{-1}$ ): 3296, 1444, 1062, 762, 699.

**$^1\text{H}$  NMR (300 MHz,  $\text{CDCl}_3$ )**:  $\delta_{\text{H}}$  7.66 (d,  $J = 7.7$  Hz, 2H, Har), 7.33 (t,  $J = 7.5$  Hz, 2H, Har), 7.22 (d,  $J = 7.3$  Hz, 1H, Har), 3.59 – 3.42 (m, 1H, H-10), 3.16 – 3.03 (m, 3H, H-10, H-9), 2.27 – 2.18 (bs, 1H, NH), 1.90 (s, 3H, H-8).

**$^{13}\text{C}$  NMR (75 MHz,  $\text{CDCl}_3$ )**:  $\delta_{\text{C}}$  147.4 (Cq, C-6), 128.0 (x2 CH, C-1, C-5), 126.8 (CH, C-3), 125.9 (x2 CH, C-2, C-4), 82.5 (Cq, C-7), 51.5 ( $\text{CH}_2$ , C-10), 37.4 ( $\text{CH}_2$ , C-9), 33.4 ( $\text{CH}_3$ , C-8).

**HRMS (ESI<sup>+</sup>)**: Calcd for  $\text{C}_{10}\text{H}_{14}\text{NS}$  [ $\text{M}+\text{H}$ ]<sup>+</sup> 180.0841, found 180.0850.

The synthesis of this product was reported in the following reference: F. Danton, M. Othman, A. M. Lawson, J. Moncol, A. Ghinet, B. Rigo, A. Daïch, *Chem. Eur. J.* **2019**, *25*, 6113–6118.

## Step 2. Synthesis of 1-(2-Methyl-2-phenylthiazolidin-3-yl)ethanone (**4c**)

To a solution of *N,S*-acetal **4c'** (0.20 g, 1.85 mmol, 1.0 eq.) in 3 mL of toluene at 60 °C were added pyridine (0.16 g, 2.03 mmol, 1.1 eq.) and acetyl chloride (0.16 g, 2.03 mmol, 1.1 eq.) and the reaction was allowed to stir for 3 h. After filtration and concentration under reduced pressure, the resulting mixtures led to pure *N*-acetyl-*N,S*-acetal compound **4c** in 89% after purification on silica gel column chromatography.

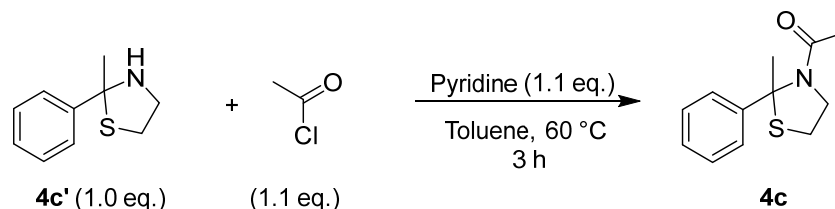

NMR spectra of product **4c** was recorded at 50 °C in deuterated acetonitrile in order to simplify the analysis. Indeed, at room temperature, spectra were difficult to interpret due to the presence of rotamers probably.

## 1-(2-Methyl-2-phenylthiazolidin-3-yl)ethanone (**4c**)

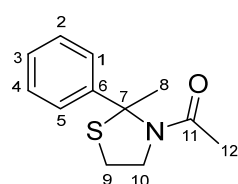

White solid,  $R_f = 0.43$ , eluent (ethyl acetate / cyclohexane = 4/6), mp = 94–96 °C (*Bull. Soc. Chim. Fr.* **1964**, 2493-2499, 91 °C), 200 mg scale reaction (in 2 mL of toluene), 220 mg were isolated, 89% yield.

IR ( $\nu_{\max}$  /  $\text{cm}^{-1}$ ): 1635, 1394, 1348, 728, 699.

$^1\text{H}$  NMR (300 MHz,  $\text{CD}_3\text{CN}$ , 50 °C):  $\delta_{\text{H}}$  7.43 (d,  $J = 7.7$  Hz, 2H, H-1, H-5), 7.36 (t,  $J = 7.5$  Hz, 2H, H-2, H-4), 7.27 (dd,  $J = 13.6, 6.8$  Hz, 1H, H-3), 4.15 (dt,  $J = 12.2, 6.0$  Hz, 2H, H-10), 3.14 (dt,  $J = 12.0, 6.0$  Hz, 1H, H-9), 3.02 (dt,  $J = 12.0, 6.3$  Hz, 1H, H-9), 2.25 (s, 3H, H-8), 2.24 – 1.94 (bs, 3H, H-12).

$^{13}\text{C}$  NMR (75 MHz,  $\text{CD}_3\text{CN}$ , 50 °C):  $\delta_{\text{C}}$  168.5 ( $\text{C}_{\text{qC=O}}$ , C-11), 147.0 ( $\text{C}_{\text{q}}$ , C-6), 129.1 (x2 CH, C-2, C-4), 127.8 (CH, C-3), 126.1 (x2 CH, C-1, C-5), 75.8 (CH, C-7), 55.5 ( $\text{CH}_2$ , C-10), 29.7 ( $\text{CH}_2$ , C-9), 27.8 ( $\text{CH}_3$ , C-8), 25.5 ( $\text{CH}_3$ , C-12).

HRMS (ESI<sup>+</sup>): Calcd for  $\text{C}_{12}\text{H}_{16}\text{NO}_2$  [ $\text{M}+\text{H}$ ]<sup>+</sup> 222.0947, found 222.0944.

The synthesis of this product was reported in the following reference: F. Danton, M. Othman, A. M. Lawson, J. Moncol, A. Ghinet, B. Rigo, A. Daïch, *Chem. Eur. J.* **2019**, *25*, 6113–6118.

## III. General procedure for the synthesis in domino process of iodothiazine compounds **7aA**, **7bA** and **7cA**.

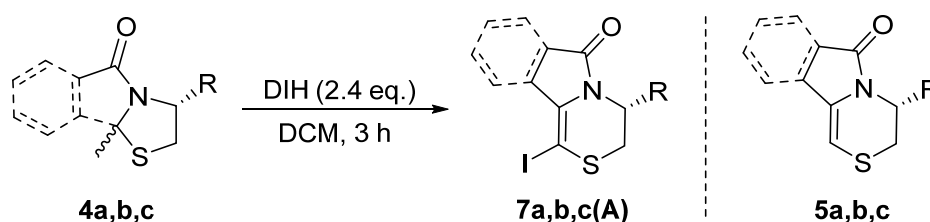

To 100 mg (1 eq.) of *N,S*-acetal substrate **4a**, **4b** or **4c**, described by our group in previous work, was dissolved in dry DCM (15 mL) and 2.4 equivalents of 1,3-diiodo-5,5-dimethylhydantoin (DIH) was then added dropwise at room temperature and the reaction mixture was stirred for 3 hours. After completion of the reaction (TLC), an aqueous solution of sodium thiosulfate ( $\text{Na}_2\text{S}_2\text{O}_3$  0.2 M, 10 mL) was then added to

quench the reaction. After extraction with DCM three times (3x10 mL), the organic layers were collected and dried on MgSO<sub>4</sub>. The solvent was evaporated under reduced pressure and a purification on flash chromatography (ethyl acetate/cyclohexane = 3/7 up to 4/6) was performed to provide the expected iodinated compounds **7aA** (87 mg), **7bA** (87 mg) and **7cA** (95 mg) in an isolated yield of 54%, 57% and 50%, respectively.

**Important remark:** Following the same protocol, but when 1 up to 1.4 equivalents of *N*-iodosuccinimide (NIS) or 1 equivalent of DIH was used (see the following details in **Table 1**), only the Morin-rearrangement compound **5a** was isolated in yields of 38% up to 57% yield.

**Table 1.** Optimization of domino Morin-transposition/ halogenation of **4a** into 1,4-thiazines **7a** (X=I), **7aB** (X=Br) and **7aC** (X=Cl).<sup>a</sup>

| Entry | Halogenating reagent (eq.) | X  | Product % <b>5a</b> | Product % <b>7a(A,B,C)</b> | Product <b>7a</b> | Time (h) | Yield (%) <sup>[a]</sup> |
|-------|----------------------------|----|---------------------|----------------------------|-------------------|----------|--------------------------|
| 1     | NIS (1.0 eq.)              | I  | 100%                | -                          |                   | 4        | 38                       |
| 2     | NIS (1.4 eq.)              | I  | 100%                | -                          |                   | 4        | 51                       |
| 3     | DIH (1.0 eq.)              | I  | 100%                | -                          |                   | 4        | 57                       |
| 4     | DIH (2.4 eq.)              | I  | -                   | 100%                       | <b>7aA</b>        | 3        | 54                       |
| 5     | NBS (1.0 eq.)              | Br | 56%                 | 44%                        | <b>7aB</b>        | 4        | .. <sup>[b]</sup>        |
| 6     | NBS (2.0 eq.)              | Br | -                   | 100%                       | <b>7aB</b>        | 4        | 69                       |
| 7     | DBH (1.1 eq.)              | Br | -                   | 100%                       | <b>7aB</b>        | 0.5      | 88                       |
| 8     | +BHT (2.2 eq.)             | Br | -                   | 100%                       | <b>7aB</b>        | 0.5      | 79                       |
| 9     | NCS (1.4 eq.)              | Cl | -                   | -                          | <b>7aC</b>        | 4        | .. <sup>[c]</sup>        |
| 10    | ICl (4.2 eq.)              | Cl | -                   | 100%                       | <b>7aC</b>        | 3        | 88                       |
| 11    | ICl (1.4 eq.)              | Cl | 100%                | -                          | <b>7aC</b>        | 4        | 96                       |

<sup>[a]</sup> **7a** (X=I), **7aB** (X=Br) and **7aC** (X=Cl).

<sup>[b]</sup> Isolated yield.

<sup>[c]</sup> Ratio determined by <sup>1</sup>H NMR.

<sup>[d]</sup> Complex mixture containing traces of **5a** and **7aC**.

### 1-Iodo-3,4-dihydro-6*H*-[1,4]thiazino[3,4-*a*]isoindol-6-one (**7aA**)

This product was isolated pure as yellow solid, *R*<sub>f</sub> = 0.60, eluent (ethyl acetate / cyclohexane = 4/6), mp = 165–167 °C, 100 mg scale reaction (in 3 mL of dichloromethane), 87 mg was isolated, 54% yield.

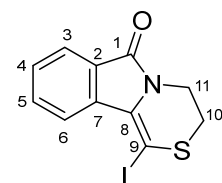

**IR** ( $\nu_{\text{max}}$  /  $\text{cm}^{-1}$ ): 1666, 1349, 1032, 755, 686.

**<sup>1</sup>H NMR** (300 MHz, CDCl<sub>3</sub>):  $\delta_{\text{H}}$  8.69 (d, *J* = 7.9 Hz, 1H, H-6), 7.85 (d, *J* = 7.3 Hz, 1H, H-3), 7.62 (t, *J* = 7.6 Hz, 1H, H-5), 7.50 (t, *J* = 7.5 Hz, 1H, H-4), 4.38 – 4.29 (m, 2H, H-11), 3.19 – 3.10 (m, 2H, H-10).

**<sup>13</sup>C NMR** (75 MHz, CDCl<sub>3</sub>):  $\delta_{\text{C}}$  165.0 (C<sub>q</sub>C=O, C-1), 135.3 (C<sub>q</sub>, C-7), 131.8 (CH, C-3), 130.8 (C<sub>q</sub>, C-8), 129.2 (CH, C-4), 128.8 (C<sub>q</sub>, C-2), 123.5 (CH, C-6), 122.4 (CH, C-3), 61.7 (C<sub>q</sub>, C-9), 39.4 (CH<sub>2</sub>, C-11), 31.7 (CH<sub>2</sub>, C-10).

**HRMS (ESI<sup>+</sup>):** Calcd for C<sub>11</sub>H<sub>9</sub>INOS [M+H]<sup>+</sup> 329.9444, found 329.9458.

**Ethyl (R)-1-Iodo-6-oxo-3,4-dihydro-6H-[1,4]thiazino[3,4-a]isoindole-4-carboxylate (7bA)**

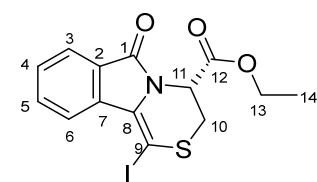

This product was isolated pure as yellow oil, R<sub>f</sub> = 0.42, eluent (ethyl acetate / cyclohexane = 3/7), 100 mg scale reaction (in 3 mL of dichloromethane), 83 mg was isolated, 57% yield.

**IR (ν<sub>max</sub> / cm<sup>-1</sup>):** 1743, 1683, 1198, 760, 692.

**<sup>1</sup>H NMR (300 MHz, CDCl<sub>3</sub>):** δ<sub>H</sub> 8.70 (d, *J* = 8.0 Hz, 1H, H-6), 7.87 (d, *J* = 7.5 Hz, 1H, H-3), 7.70 – 7.57 (m, 1H, H-5), 7.57 – 7.45 (m, 1H, H-4), 5.74 (t, *J* = 3.3 Hz, 1H, H-11), 4.24 (qd, *J* = 7.3, 1.4 Hz, 2H, H-13), 3.48 (dd, *J* = 13.1, 3.5 Hz, 1H, H-10), 3.36 (dd, *J* = 13.1, 3.0 Hz, 1H, H-10), 1.25 (t, *J* = 7.2 Hz, 3H, H-14).

**<sup>13</sup>C NMR (75 MHz, CDCl<sub>3</sub>):** δ<sub>C</sub> 167.6 (C<sub>q</sub>C=O, C-11), 165.1 (C<sub>q</sub>C=O, C-1), 135.6 (C<sub>q</sub>, C-7), 132.2 (C<sub>q</sub>, C-5), 130.2 (C<sub>q</sub>, C-2), 129.3 (C<sub>q</sub>, C-4), 128.4 (C<sub>q</sub>, C-9), 123.9 (CH, C-3), 122.6 (CH, C-6), 62.5 (CH<sub>2</sub>, C-13), 60.2 (C<sub>q</sub>, C-9), 50.8 (CH, C-11), 33.2 (CH<sub>2</sub>, C-10), 14.3 (CH<sub>3</sub>, C-14).

**HRMS (ESI<sup>+</sup>):** Calcd for C<sub>14</sub>H<sub>13</sub>INO<sub>3</sub>S [M+H]<sup>+</sup> 401.9655, found 401.9652.

[α]<sub>D</sub><sup>25</sup> = -295.7 (c 0.210 g/100 mL, CH<sub>2</sub>Cl<sub>2</sub>).

**1-(6-Iodo-5-phenyl-2,3-dihydro-4H-1,4-thiazin-4-yl)ethan-1-one (7cA)**

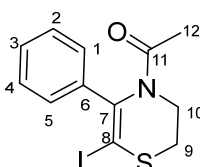

This product was isolated pure as yellow solid, R<sub>f</sub> = 0.68, eluent (ethyl acetate / cyclohexane = 4/6), mp = 152–154 °C, 70 mg scale reaction (in 2 mL of dichloromethane), 67 mg was isolated, 50% yield.

**IR (ν<sub>max</sub> / cm<sup>-1</sup>):** 1663, 1372, 1219, 750, 697.

**<sup>1</sup>H NMR (300 MHz, CDCl<sub>3</sub>):** δ<sub>H</sub> 7.43 – 7.28 (m, 5H, Har), 4.17 (t, *J* = 5.5 Hz, 2H, H-10), 3.26 (t, *J* = 5.5 Hz, 2H, H-9), 1.59 (s, 3H, H-12).

**<sup>13</sup>C NMR (75 MHz, CDCl<sub>3</sub>):** δ<sub>C</sub> 170.6 (C<sub>q</sub> C=O, C-11), 139.5 (C<sub>q</sub>, C-6), 138.6 (C<sub>q</sub>, C-7), 129.5 (x2 CH, C-2, C-4), 128.6 (CH, C-3), 128.2 (x2 CH, C-1, C-5), 79.7 (C<sub>q</sub>, C-8), 41.8 (CH<sub>2</sub>, C-9), 36.2 (CH<sub>2</sub>, C-10), 24.4 (CH<sub>3</sub>, C-9).

**HRMS (ESI<sup>+</sup>):** Calcd for C<sub>12</sub>H<sub>13</sub>INOS [M+H]<sup>+</sup> 345.9757, found 345.9773.

**Important remark:** Following the same protocol, but when 1 up to 1.4 equivalents of *N*-iodosuccinimide (NIS) or 1 equivalent of DIH were used (see the following details in **Table 1**), only the Morin-rearrangement compound **5a** (in 38% up to 57% yield), **5b** (in 56% yield) or **5c** (in 96% yield) was isolated.

**3H-[1,4]Thiazino[3,4-a]isoindol-6(4H)-one (5a)**

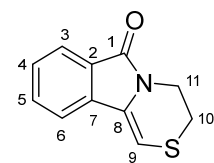

This product was isolated pure as white solid, R<sub>f</sub> = 0.31, eluent (ethyl acetate / cyclohexane = 3/7), mp = 107–109 °C, was isolated in 38% up to 57% yield.

**IR (ν<sub>max</sub> / cm<sup>-1</sup>):** 1698, 1351, 1242, 745.

**<sup>1</sup>H NMR (300 MHz, CDCl<sub>3</sub>):** δ<sub>H</sub> 7.77 (d, *J* = 7.5 Hz, 1H, Har), 7.54 – 7.45 (m, 2H, Har), 7.38 (ddd, *J* = 8.0, 6.4, 2.1 Hz, 1H, Har), 6.24 (s, 1H, H-9), 4.18 – 4.06 (m, 2H, H-11), 3.15 – 3.03 (m, 2H, H-10).

**<sup>13</sup>C NMR (75 MHz, CDCl<sub>3</sub>):** δ<sub>C</sub> 165.6 (C<sub>q</sub>C=O, C-1), 134.7 (C<sub>q</sub>, C-8), 131.7 (CH, Car), 130.7 (C<sub>q</sub>, Car), 128.3 (CH, Car), 127.8 (C<sub>q</sub>, Car), 123.1 (CH, Car), 118.7 (CH, Car), 99.7 (CH, C-9), 39.3 (CH<sub>2</sub>, C-11), 26.0 (CH<sub>2</sub>, C-10).

**HRMS (ESI<sup>+</sup>):** Calcd for C<sub>11</sub>H<sub>10</sub>NOS [M+H]<sup>+</sup> 204.0478, found 204.0478.

The synthesis of this product was reported in the following reference: F. Danton, M. Othman, A. M. Lawson, J. Moncol, A. Ghinet, B. Rigo, A. Daïch, *Chem. Eur. J.* **2019**, *25*, 6113–6118.

#### Ethyl 6-oxo-4,6-dihydro-3H-[1,4]thiazino[3,4-a]isoindole-4-carboxylate (**5b**)

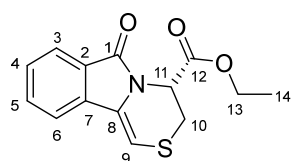

This product was isolated pure as yellow solid,  $R_f = 0.38$ , eluent (ethyl acetate / cyclohexane = 3/7), mp = 124–127 °C, was isolated after separation in 56% yield.

**IR** ( $\nu_{\max}$  /  $\text{cm}^{-1}$ ): 1732, 1687, 1202, 763.

**$^1\text{H}$  NMR (300 MHz,  $\text{CDCl}_3$ )**:  $\delta_{\text{H}}$  7.83 (d,  $J = 7.6$  Hz, 1H, Har), 7.63 – 7.50 (m, 2H, Har), 7.43 (ddd,  $J = 8.0, 6.5, 1.9$  Hz, 1H, Har), 6.25 (d,  $J = 1.9$  Hz, 1H, H-9), 5.47 (t,  $J = 3.3$  Hz, 1H, H-11), 4.22 (q,  $J = 7.1$  Hz, 2H, H-13), 3.50 (dt,  $J = 13.1, 2.6$  Hz, 1H, H-10), 3.27 (dd,  $J = 13.1, 3.6$  Hz, 1H, H-10), 1.24 (t,  $J = 7.1$  Hz, 3H, H-14).

**$^{13}\text{C}$  NMR (75 MHz,  $\text{CDCl}_3$ )**:  $\delta_{\text{C}}$  167.8 ( $\text{C}_{\text{qC=O}}$ , C-12), 165.9 ( $\text{C}_{\text{qC=O}}$ , C-1), 135.0 ( $\text{C}_{\text{q}}$ , C-8), 132.2 ( $\text{C}_{\text{q}}$ , Car), 130.4 ( $\text{C}_{\text{q}}$ , Car), 128.6 (CH, Car), 127.4 ( $\text{C}_{\text{q}}$ , Car), 123.6 (CH, Car), 119.1 (CH, Car), 99.0 (CH, C-9), 62.3 ( $\text{CH}_2$ , C-13), 50.8 (CH, C-11) 28.1 ( $\text{CH}_2$ , C-10), 14.2 ( $\text{CH}_3$ , C-14).

**HRMS (ESI<sup>+</sup>)**: Calcd for  $\text{C}_{14}\text{H}_{14}\text{NO}_3\text{S}$  [ $\text{M}+\text{H}$ ]<sup>+</sup> 276.0689, found 276.0693.

$[\alpha]_{\text{D}}^{25} = -64.82$  (c 0.218 g/100 mL,  $\text{CH}_2\text{Cl}_2$ ).

#### 1-(5-Phenyl-2H-1,4-thiazin-4(3H)-yl)ethanone (**5c**)

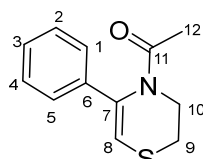

This product was isolated pure as white solid,  $R_f = 0.42$ , eluent (ethyl acetate / cyclohexane = 3/7), mp = 193–195 °C, was isolated in 96% yield.

**IR** ( $\nu_{\max}$  /  $\text{cm}^{-1}$ ): 1664, 1363, 1223, 946, 812, 756, 693.

**$^1\text{H}$  NMR (300 MHz,  $\text{CDCl}_3$ )**:  $\delta_{\text{H}}$  7.40 – 7.26 (m, 5H, Har), 6.15 (s, 1H, H-8), 4.03 – 3.93 (m, 2H, H-10), 3.16 – 3.08 (m, 2H, H-9), 1.70 (s, 3H, H-12).

**$^{13}\text{C}$  NMR (75 MHz,  $\text{CDCl}_3$ )**:  $\delta_{\text{C}}$  171.4 ( $\text{C}_{\text{qC=O}}$ , C-11), 138.9 ( $\text{C}_{\text{q}}$ , C-7), 135.9 ( $\text{C}_{\text{q}}$ , C-6), 129.1 (x2 CH, C-2, C-4), 127.8 (CH, C-3), 124.6 (x2 CH, C-1, C-5), 113.2 (CH, C-8), 40.5 ( $\text{CH}_2$ , C-10), 28.4 ( $\text{CH}_2$ , C-9), 24.4 ( $\text{CH}_3$ , C-12).

**HRMS (ESI<sup>+</sup>)**: Calcd for  $\text{C}_{12}\text{H}_{14}\text{NOS}$  [ $\text{M}+\text{H}$ ]<sup>+</sup> 220.0791, found 220.0797.

#### IV. General procedure for the synthesis in domino process of bromothiazine compounds **7aB**, **7bB** and **7cB**.

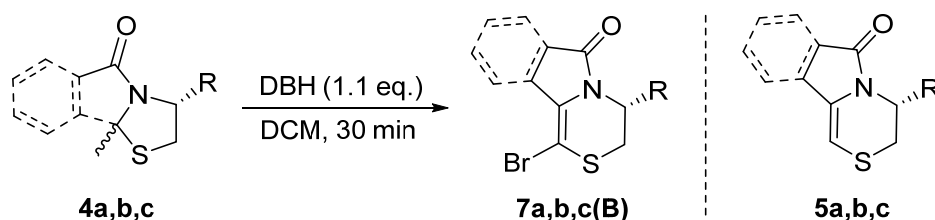

To 100 mg (1 eq.) of *N,S*-acetal substrate **4a**, **4b** or **4c**, described by our group in previous work, was dissolved in dry DCM (15 mL) and 1.1 equivalents of DBH was then added dropwise at room temperature and the reaction mixture was stirred for 30 minutes. After completion of the reaction (TLC), an aqueous solution of saturated sodium bicarbonate ( $\text{NaHCO}_3$  10 mL) was then added to quench the reaction. After three times extractions with DCM (3x10 mL), the organic layers were collected and dried on  $\text{MgSO}_4$ . The solvent was evaporated under reduced pressure and a purification on flash chromatography (ethyl

acetate/cyclohexane = 4/6) was performed to provide the expected brominated compounds **7aB** (121 mg), **7bB** (108 mg) and **7cB** (91 mg) in an isolated yield of 88%, 85% and 55%, respectively.

**Important remarks:** Following the same protocol, but when 1.0 equivalent of *N*-bromosuccinimide (NBS) was used with *N,S*-acetal substrate **4a** (see the following details in **Table 1**), the brominated product **7aB** accompanied with the Morin-rearrangement compound **5a** were isolated in yields of 44% up to 56% yield, respectively. However, when 2.0 equivalents of *N*-bromosuccinimide (NBS) were used, only the Morin-rearrangement compound **5a** was isolated in 69% yield after 6 hours of the reaction (see details in **Table 1** and **entry 6**). Of interest, by using other conditions depending on the number of equivalents of NBS, we also isolate the Morin-rearrangement compounds **5b** and **5c** when starting with *N,S*-acetal substrates **4b** and **4c**, respectively.

### 1-Bromo-3,4-dihydro-6*H*-[1,4]thiazino[3,4-*a*]isoindol-6-one (**7aB**)

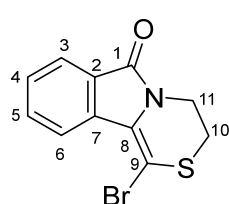

Yellow solid,  $R_f = 0.61$ , eluent (ethyl acetate / cyclohexane = 4/6), mp = 155–157 °C, 100 mg scale reaction (in 3 mL of dichloromethane), 121 mg was isolated, 88% yield.

**IR** ( $\nu_{\max}$  /  $\text{cm}^{-1}$ ): 1677, 1352, 1032, 754, 682.

**$^1\text{H}$  NMR (300 MHz,  $\text{CDCl}_3$ ):**  $\delta_{\text{H}}$  8.44 (d,  $J = 7.9$  Hz, 1H, H-6), 7.85 (d,  $J = 7.5$  Hz, 1H, H-3), 7.60 (t,  $J = 7.2$  Hz, 1H, H-5), 7.49 (t,  $J = 7.4$  Hz, 1H, H-4), 4.26 – 4.19 (m, 2H, H-11), 3.26 – 3.18 (m, 2H, H-10).

**$^{13}\text{C}$  NMR (75 MHz,  $\text{CDCl}_3$ ):**  $\delta_{\text{C}}$  165.1 ( $\text{C}_{\text{qC=O}}$ , C-1), 134.6 ( $\text{C}_{\text{q}}$ , C-7), 132.2 (CH, C-5), 129.1 ( $\text{C}_{\text{q}}$ , C-8), 129.0 (CH, C-4), 128.7 ( $\text{C}_{\text{q}}$ , C-2), 123.5 (CH, C-3), 123.4 (CH, C-6), 96.8 ( $\text{C}_{\text{q}}$ , C-9), 39.3 ( $\text{CH}_2$ , C-9), 30.0 ( $\text{CH}_2$ , C-10).

**HRMS (ESI $^+$ ):** Calcd for  $\text{C}_{11}\text{H}_9\text{BrNOS}$  [ $\text{M}+\text{H}$ ] $^+$  281.9583, found 281.9596.

### Ethyl (*R*)-1-bromo-6-oxo-3,4-dihydro-6*H*-[1,4]thiazino[3,4-*a*]isoindole-4-carboxylate (**7bB**)

Brown oil,  $R_f = 0.66$ , eluent (ethyl acetate / cyclohexane = 4/6), 100 mg scale (in 3 mL of dichloromethane), 108 mg was isolated, 85% yield.

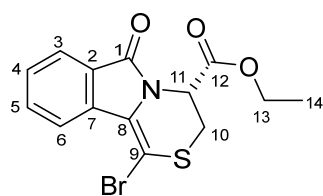

**IR** ( $\nu_{\max}$  /  $\text{cm}^{-1}$ ): 1747, 1687, 1193, 761, 691.

**$^1\text{H}$  NMR (300 MHz,  $\text{CDCl}_3$ ):**  $\delta_{\text{H}}$  8.46 (d,  $J = 8.0$  Hz, 1H, H-6), 7.88 (d,  $J = 7.3$  Hz, 1H, H-3), 7.63 (td,  $J = 7.7, 1.3$  Hz, 1H, H-5), 7.51 (td,  $J = 7.5, 1.0$  Hz, 1H, H-4), 5.60 (t,  $J = 3.3$  Hz, 1H, H-11), 4.24 (q,  $J = 7.1$  Hz, 2H, H-13), 3.55 – 3.43 (m, 2H, H-10), 1.26 (t,  $J = 7.1$  Hz, 1H, H-14).

**$^{13}\text{C}$  NMR (75 MHz,  $\text{CDCl}_3$ ):**  $\delta_{\text{C}}$  167.5 ( $\text{C}_{\text{qC=O}}$ , C-12), 165.2 ( $\text{C}_{\text{qC=O}}$ , C-1), 134.9 ( $\text{C}_{\text{q}}$ , C-7), 132.6 (CH, C-5), 129.2 (CH, C-4), 128.6 ( $\text{C}_{\text{q}}$ , C-2), 128.2 ( $\text{C}_{\text{q}}$ , C-8), 123.8 (CH, C-3), 123.6 (CH, C-6), 95.6 ( $\text{C}_{\text{q}}$ , C-9), 62.6 ( $\text{CH}_2$ , C-13), 50.7 (CH, C-11), 31.6 ( $\text{CH}_2$ , C-10), 14.3 ( $\text{CH}_3$ , C-14).

**HRMS (ESI $^+$ ):** Calcd for  $\text{C}_{14}\text{H}_{13}\text{BrNO}_3\text{S}$  [ $\text{M}+\text{H}$ ] $^+$  353.9794, found 353.9809.

$[\alpha]_{\text{D}}^{25} = -177.8$  (c 0.190 g/100 mL,  $\text{CH}_2\text{Cl}_2$ ).

### 1-(6-Bromo-5-phenyl-2,3-dihydro-4*H*-1,4-thiazin-4-yl)ethan-1-one (7cB)

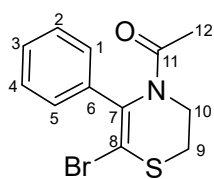

Yellow solid,  $R_f = 0.73$ , eluent (ethyl acetate / cyclohexane = 4/6), mp = 148–150 °C, 70 mg scale reaction (in 2 mL of dichloromethane), 64 mg was isolated, 55% yield.

**IR** ( $\nu_{\max}$  /  $\text{cm}^{-1}$ ): 1662, 1374, 1219, 779, 705.

**$^1\text{H}$  NMR (300 MHz,  $\text{CDCl}_3$ )**:  $\delta_{\text{H}}$  7.49 – 7.28 (m, 5H, Har), 4.10 (t,  $J = 5.8$  Hz, 2H, H-10), 3.31 (t,  $J = 5.6$  Hz, 2H, H-9), 1.61 (s, 3H, H-12).

**$^{13}\text{C}$  NMR (75 MHz,  $\text{CDCl}_3$ )**:  $\delta_{\text{C}}$  170.9 ( $\text{C}_{\text{qC=O}}$ , C-11), 137.4 ( $\text{C}_{\text{q}}$ , C-6), 135.6 ( $\text{C}_{\text{q}}$ , C-7), 129.1 (x2 CH, C-2, C-4), 128.6 (CH, C-3), 128.3 (x2 CH, C-1, C-5), 109.6 ( $\text{C}_{\text{q}}$ , C-8), 41.6 ( $\text{CH}_2$ , C-10), 34.7 ( $\text{CH}_2$ , C-9), 24.2 ( $\text{CH}_3$ , C-12).

**HRMS (ESI $^+$ )**: Calcd for  $\text{C}_{12}\text{H}_{13}\text{BrNOS}$  [ $\text{M}+\text{H}$ ] $^+$  297.9896, found 297.9915.

### V. General procedure for the synthesis in domino process of chlorothiazine compounds 7aC, 7bC and 7cC.

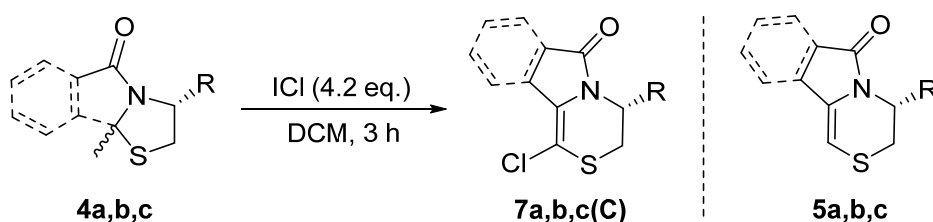

To 100 mg (1 eq.) of *N,S*-acetal substrate **4a**, **4b** or **4c**, described by our group in previous work, was dissolved in dry DCM (15 mL) and 4.2 equivalents of ICl (2.0 M solution of acetic acid) was then added dropwise at room temperature and the reaction mixture was stirred for 3 hours. After completion of the reaction (TLC), an aqueous solution of sodium thiosulfate ( $\text{Na}_2\text{S}_2\text{O}_3$  0.2 M, 10 mL) was then added to quench the reaction. After three times extractions with DCM (3x10 mL), the organic layers were collected and dried on  $\text{MgSO}_4$ . The solvent was evaporated under reduced pressure and a purification on flash chromatography (ethyl acetate/cyclohexane = 4/6) was performed to provide the expected brominated compounds **7aC** (102 mg), **7bC** (102 mg) and **7cC** (87 mg) in an isolated yield of 88%, 91% and 54%, respectively.

**Important remark:** Following the same protocol, but when 1 equivalent of *N*-iodosuccinimide (ICl) was used (see the following details in **Table 1**), only the Morin-rearrangement compound **5a** was isolated in 96% yield. No reaction was conducted with *N,S*-acetal substrate **4b** or **4c** using these reaction conditions.

### 1-Chloro-3,4-dihydro-6*H*-[1,4]thiazino[3,4-*a*]isoindol-6-one (7aC)

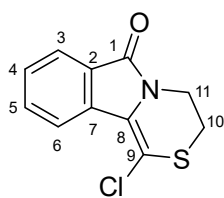

Yellow solid,  $R_f = 0.45$ , eluent (ethyl acetate / cyclohexane = 4/6), mp = 158–160 °C, 100 mg scale reaction (in 3 mL of dichloromethane), 102 mg was isolated, 88% yield.

**IR** ( $\nu_{\max}$  /  $\text{cm}^{-1}$ ): 1678, 1352, 1034, 751, 685.

**$^1\text{H}$  NMR (300 MHz,  $\text{CDCl}_3$ )**:  $\delta_{\text{H}}$  8.24 (d,  $J = 7.9$  Hz, 1H, H-6), 7.85 (d,  $J = 7.6$  Hz, 1H, H-3), 7.59 (td,  $J = 7.6, 1.3$  Hz, 1H, H-5), 7.47 (td,  $J = 7.5, 0.9$  Hz, 1H, H-4), 4.18 – 4.13 (m, 2H, H-11), 3.26 – 3.20 (m, 2H, H-10).

**$^{13}\text{C}$  NMR (75 MHz,  $\text{CDCl}_3$ )**:  $\delta_{\text{C}}$  165.1 ( $\text{C}_{\text{qC=O}}$ , C-1), 133.9 ( $\text{C}_{\text{q}}$ , C-7), 132.4 (CH, C-5), 128.9 (CH, C-4), 128.4 ( $\text{C}_{\text{q}}$ , C-2), 128.3 ( $\text{C}_{\text{q}}$ , C-8), 123.6 (CH, C-6), 123.5 (CH, C-3), 110.8 ( $\text{C}_{\text{q}}$ , C-9), 39.2 ( $\text{CH}_2$ , C-9), 29.0 ( $\text{CH}_2$ , C-10).

**HRMS (ESI $^+$ )**: Calcd for  $\text{C}_{11}\text{H}_9\text{ClNOS}$  [ $\text{M}+\text{H}$ ] $^+$  238.0088, found 238.0098.

### Ethyl (*R*)-1-chloro-6-oxo-3,4-dihydro-6*H*-[1,4]thiazino[3,4-*a*]isoindole-4-carboxylate (**7bC**)

Yellow oil,  $R_f = 0.64$ , eluent (ethyl acetate / cyclohexane = 4/6), 100 mg scale reaction (in 3 mL of dichloromethane), 102 mg was isolated, 91% yield.

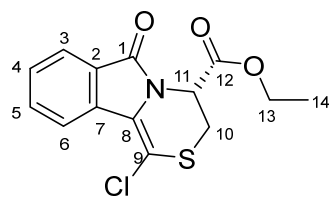

**IR** ( $\nu_{\max}$  /  $\text{cm}^{-1}$ ): 1747, 1693, 1199, 762, 692.

**$^1\text{H}$  NMR (300 MHz,  $\text{CDCl}_3$ )**:  $\delta_{\text{H}}$  8.24 (d,  $J = 8.0$  Hz, 1H, H-6), 7.86 (d,  $J = 7.7$  Hz, 1H, H-3), 7.60 (td,  $J = 7.9, 1.3$  Hz, 1H, H-5), 7.48 (td,  $J = 7.5, 1.0$  Hz, 1H, H-4), 5.50 (t,  $J = 3.3$  Hz, 1H, H-11), 4.22 (q,  $J = 7.1$  Hz, 2H, H-13), 3.54 (dd,  $J = 13.1, 3.0$  Hz, 1H, H-10), 3.45 (dd,  $J = 13.2, 3.5$  Hz, 1H, H-10), 1.24 (t,  $J = 7.1$  Hz, 3H, H-14).

**$^{13}\text{C}$  NMR (75 MHz,  $\text{CDCl}_3$ )**:  $\delta_{\text{C}}$  167.4 ( $\text{C}_{\text{qC=O}}$ , C-12), 165.1 ( $\text{C}_{\text{qC=O}}$ , C-1), 134.1 ( $\text{C}_{\text{q}}$ , C-7), 132.8 ( $\text{CH}$ , C-5), 129.0 ( $\text{CH}$ , C-4), 127.9 ( $\text{C}_{\text{q}}$ , C-2), 127.8 ( $\text{C}_{\text{q}}$ , C-8), 123.7 (x2  $\text{CH}$ , C-3, C-6), 109.7 ( $\text{C}_{\text{q}}$ , C-9), 62.5 ( $\text{CH}_2$ , C-13), 50.5 ( $\text{CH}$ , C-11), 30.7 ( $\text{CH}_2$ , C-10), 14.2 ( $\text{CH}_3$ , C-14).

**HRMS (ESI<sup>+</sup>)**: Calcd for  $\text{C}_{14}\text{H}_{13}\text{ClNO}_3\text{S}$  [ $\text{M}+\text{H}$ ]<sup>+</sup> 310.0299, found 310.0316.

$[\alpha]_{\text{D}}^{25} = -160.8$  (c 0.260 g/100 mL,  $\text{CH}_2\text{Cl}_2$ ).

### 1-(6-Chloro-5-phenyl-2,3-dihydro-4*H*-1,4-thiazin-4-yl)ethan-1-one (**7cC**)

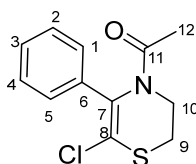

Yellow solid,  $R_f = 0.63$ , eluent (ethyl acetate / cyclohexane = 4/6), mp = 151–153 °C, 70 mg scale reaction (in 2 mL of dichloromethane), 61 mg was isolated, 54% yield.

**IR** ( $\nu_{\max}$  /  $\text{cm}^{-1}$ ): 1659, 1371, 1218, 775, 705.

**$^1\text{H}$  NMR (300 MHz,  $\text{CDCl}_3$ )**:  $\delta$  7.50 – 7.28 (m, 5H, Har), 4.07 (t,  $J = 5.6$  Hz, 2H, H-10), 3.51 – 3.18 (m, 2H, H-9), 1.63 (s, 3H, H-12).

**$^{13}\text{C}$  NMR (75 MHz,  $\text{CDCl}_3$ )**:  $\delta_{\text{C}}$  171.2 ( $\text{C}_{\text{qC=O}}$ , C-11), 136.2 ( $\text{C}_{\text{q}}$ , C-6), 134.1 ( $\text{C}_{\text{q}}$ , C-7), 128.8 (x2  $\text{CH}$ , C-2, C-4), 128.6 ( $\text{CH}$ , C-3), 128.5 (x2  $\text{CH}$ , C-1, C-5), 121.8 ( $\text{C}_{\text{q}}$ , C-8), 41.6 ( $\text{CH}_2$ , C-10), 33.5 ( $\text{CH}_2$ , C-9), 24.2 ( $\text{CH}_3$ , C-12).

**HRMS (ESI<sup>+</sup>)**: Calcd for  $\text{C}_{12}\text{H}_{13}\text{ClNOS}$  [ $\text{M}+\text{H}$ ]<sup>+</sup> 254.0401, found 254.0398.

## VI. General procedure for the synthesis of 3,4-dihydro-6*H*-pyrrolo[2,1-*c*][1,4]thiazin-6-one (**9**) and 8-bromo-3,4-dihydro-6*H*-pyrrolo[2,1-*c*][1,4]thiazin-6-one (**7dB**).

### Step 1: 7*a*-Methyltetrahydropyrrolo[2,1-*b*]thiazol-5(6*H*)-one (**4d**)

To a stirred solution of Levulinic acid, or 4-oxopentanoic acid (2.32 g, 20 mmol) and PTSA (0.35 g, 2 mmol, 0.1 eq.) in toluene (50 mL), was added the aminothiols (1.18 g, 24 mmol, 1.2 eq.) and the mixture was heated at 110 °C for 16 h. After cooling at room temperature, the solvent was evaporated and purification on flash chromatography was performed to get the corresponding *N,S*-acetal **4d** in only 37% yield.

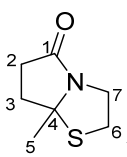

White solid,  $R_f = 0.32$ , eluent (ethyl acetate / cyclohexane = 3/7), mp = 42–44 °C, 2.32 g scale reaction (in 50 mL of toluene), 1.151 g was isolated, 37% yield.

**IR** ( $\nu_{\max}$  /  $\text{cm}^{-1}$ ): 1695, 1349, 1174, 826.

**$^1\text{H}$  NMR (300 MHz,  $\text{CDCl}_3$ )**:  $\delta_{\text{H}}$  4.43 – 4.24 (m, 1H), 3.19 – 2.89 (m, 3H), 2.71 – 2.28 (m, 3H), 2.28 – 2.03 (m, 1H), 1.60 (s, 3H).

$^{13}\text{C}$  NMR (75 MHz,  $\text{CDCl}_3$ ):  $\delta_{\text{C}}$  177.1, 77.2, 43.2, 33.4, 32.7, 31.5, 31.3.

HRMS (ESI<sup>+</sup>): Calcd for  $\text{C}_7\text{H}_{12}\text{NOS}$   $[\text{M}+\text{H}]^+$  158.0634, found 158.0636.

**Step 2:** *N,S*-Acetal substrate **4d** (50 mg, 0.318 mmol) was dissolved in DCM, then DBH (see number of equivalents in the table below) was added and the reaction mixture was stirred during 30 min. After that, a saturated solution of  $\text{NaHCO}_3$  (2 x 10 mL) was added and a three times extraction with DCM was done. After drying the combined organic layers on dry  $\text{Mg}_2\text{SO}_4$  and evaporation of solvent under reduced pressure, the compounds **4d**, **9**, **19** or **7dB** were recovered after a flash chromatography depending on the number of equivalents of DBH used (for details, see the following Table).

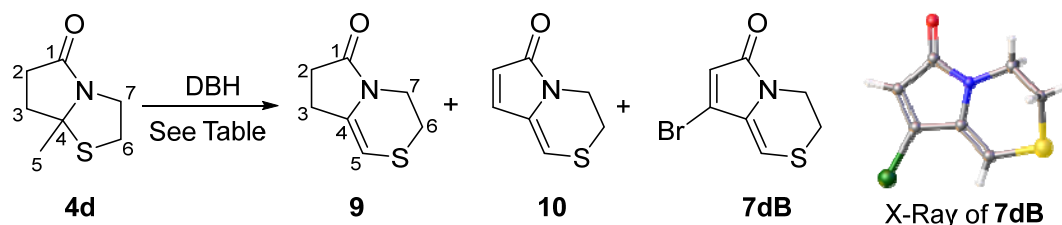

| Entry | DBH<br>(number of equivalents) | Time   | Products <b>4d/9/10/7dB</b> (in %) <sup>a</sup> |
|-------|--------------------------------|--------|-------------------------------------------------|
| 1     | 0.55                           | 30 min | 10/26/00/00                                     |
| 2     | 0.70                           | 30 min | 00/39/18/00                                     |
| 3     | 1.10                           | 30 min | 00/04/72/12                                     |
| 4     | 1.40                           | 30 min | 00/00/21/41                                     |
| 5     | 1.60                           | 30 min | 00/00/24/56                                     |
| 6     | 2.00                           | 30 min | Complex mixture                                 |

<sup>a</sup> Estimated yield after flash chromatography.

### 7,8-Dihydro-3*H*-pyrrolo[2,1-*c*][1,4]thiazin-6(4*H*)-one (**9**): Morin product

White solid,  $R_f = 0.18$ , eluent (ethyl acetate / cyclohexane = 3/7), mp = 49–51 °C 100 mg scale reaction (in 3 mL of dioxane) for 3 h, 11 mg was isolated, 11% yield.

**IR** ( $\nu_{\text{max}}$  /  $\text{cm}^{-1}$ ): 1645, 1402, 1353, 867.

**$^1\text{H}$  NMR (300 MHz,  $\text{CDCl}_3$ ):**  $\delta_{\text{H}}$  5.02 (s, 1H, H-5), 3.96 – 3.84 (m, 2H, H-7), 2.91 – 2.83 (m, 2H, H-6), 2.77 – 2.69 (m, 2H, H-2), 2.52 – 2.44 (m, 2H, H-3).

**$^{13}\text{C}$  NMR (75 MHz,  $\text{CDCl}_3$ ):**  $\delta_{\text{C}}$  175.0 ( $\text{C}_{\text{qC=O}}$ , C-1), 134.7 ( $\text{C}_{\text{q}}$ , C-4), 89.2 (CH, C-5), 41.1 ( $\text{CH}_2$ , C-7), 28.9 ( $\text{CH}_2$ , C-3), 24.3 ( $\text{CH}_2$ , C-2), 24.1 ( $\text{CH}_2$ , C-6).

HRMS (ESI<sup>+</sup>): Calcd for  $\text{C}_7\text{H}_{10}\text{NOS}$   $[\text{M}+\text{H}]^+$  156.0478, found 156.0483.

### 3,4-Dihydro-6*H*-pyrrolo[2,1-*c*][1,4]thiazin-6-one (**10**): Oxidized Morin product

Colored patous product,  $R_f = 0.32$  eluent (ethyl acetate / cyclohexane = 3/7). Only few amounts of this product were isolated pure after many separations by flash chromatography on silica gel column.

**IR** ( $\nu_{\text{max}}$  /  $\text{cm}^{-1}$ ): 1654, 1406, 1351, 868.

**$^1\text{H}$  NMR (300 MHz,  $\text{CDCl}_3$ ):**  $\delta_{\text{H}}$  6.83 (d,  $J = 5.6$  Hz, 1H, H-2), 6.03 (s, 1H, H-5), 5.99 (d,  $J = 5.7$  Hz, 1H, H-3), 3.95 – 3.84 (m, 2H, H-7), 3.08 – 2.97 (m, 2H, H-6).

**$^{13}\text{C}$  NMR (75 MHz,  $\text{CDCl}_3$ ):**  $\delta_{\text{C}}$  168.9 ( $\text{C}_{\text{qC=O}}$ , C-1), 134.7 ( $\text{C}_{\text{q}}$ , C-4), 133.1 (CH, C-3), 121.0 (CH, C-2), 108.8 (CH, C-5), 38.1 ( $\text{CH}_2$ , C-7), 26.4 ( $\text{CH}_2$ , C-6).

**HRMS (ESI<sup>+</sup>):** Calcd for C<sub>7</sub>H<sub>8</sub>NOS [M+H]<sup>+</sup> 154.0321, found 154.0319.

### 8-Bromo-3,4-dihydro-6H-pyrrolo[2,1-c][1,4]thiazin-6-one (7dB)

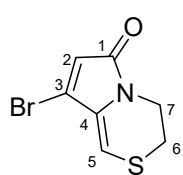

Yellow solid, R<sub>f</sub> = 0.56 eluent (ethyl acetate / cyclohexane = 3/7), mp = 127–129 °C (decomposition).

**IR (ν<sub>max</sub> / cm<sup>-1</sup>):** 1699, 1314, 1062, 786.

**<sup>1</sup>H NMR (300 MHz, CDCl<sub>3</sub>):** δ<sub>H</sub> 6.33 (s, 1H, H-5), 6.26 (s, 1H, H-2), 4.00 – 3.93 (m, 2H, H-7), 3.12 – 3.04 (m, 2H, H-8).

**<sup>13</sup>C NMR (75 MHz, CDCl<sub>3</sub>):** δ<sub>C</sub> 166.9 (C<sub>q</sub>C=O, C-1), 133.6 (C<sub>q</sub>, C-4), 126.0 (C<sub>q</sub>, C-3), 122.0 (CH, C-2), 109.8 (CH, C-5), 38.4 (CH<sub>2</sub>, C-7), 26.4 (CH<sub>2</sub>, C-6).

**HRMS (ESI<sup>+</sup>):** Calcd for C<sub>7</sub>H<sub>7</sub>BrNOS [M+H]<sup>+</sup> 231.9426, found 231.9425.

**VII. General procedure for the synthesis of 3,4-dihydro-6H-pyrrolo[2,1-c][1,4]thiazin-6-ones (8a-n, q) by the Suzuki-Miyaura coupling of halogenated substrate 7aB and boronic acids or esters (16).**

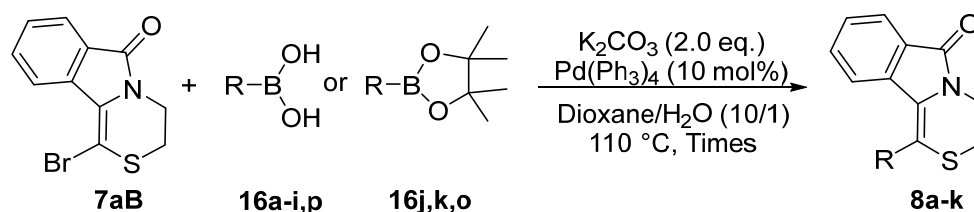

The reactions were carried out in sealed tubes. Thus, bromothiazine compound **7aB** (100 mg, 0.36 mmol) was dissolved in 4 mL of toluene or dioxane and 0.4 mL of water. To this solution, boronic acid or boronic acid ester (1.1 eq.), K<sub>2</sub>CO<sub>3</sub> (98.4 mg, 2.0 eq.) and tetrakis-(triphenylphosphine)-palladium(0) (Pd(Ph<sub>3</sub>)<sub>4</sub>, 41.1 mg, 10 mol%) were added under stirring and argon atmosphere. The reaction mixture was stirred at 110 °C and the reaction was monitored by NMR <sup>1</sup>H. After completion of the reaction (7 up to 21 hours), direct purification of the crude by flash chromatography by using the mixture of ethyl acetate/ cyclohexane = 3/7 up to 4/6 was performed to furnish the expected arylated thiazines **8a-n** in yields ranging from 55% up to 99%. With 2-furanylboronic acid (**16i**), the product **8i** obtained partially decomposed during attempts of purification. When allylboronic acid pinacol ester (**16o**) or *n*-butylboronic acid (**16p**) were used, the reaction conditions have not allowed to furnish the coupling products **8o** and **8p** and only traces were detected even if the reaction time is extended up to 21 hours.

### 1-Phenyl-3H-[1,4]thiazino[3,4-a]isoindol-6(4H)-one (8a)

Yellow solid, R<sub>f</sub> = 0.34, eluent (ethyl acetate / cyclohexane = 3/7), mp= 89–91 °C, 100 mg scale reaction (in 3 mL of dioxane) for 3 h, 77 mg was isolated, 78% yield.

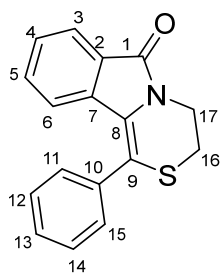

**IR (ν<sub>max</sub> / cm<sup>-1</sup>):** 1690, 1196, 749.

**<sup>1</sup>H NMR (300 MHz, CDCl<sub>3</sub>):** δ<sub>H</sub> 7.81 (d, *J* = 7.6 Hz, 1H, H-3), 7.59 – 7.41 (m, 5H, Har), 7.30 (t, *J* = 7.4 Hz, 1H, H-4), 7.18 (td, *J* = 7.9, 1.3 Hz, 1H, H-5), 6.59 (d, *J* = 7.9 Hz, 1H, H-6), 4.36 – 4.13 (m, 2H, H-17), 3.31 – 3.14 (m, 2H, H-18).

**<sup>13</sup>C NMR (75 MHz, CDCl<sub>3</sub>):** δ<sub>C</sub> 165.7 (C<sub>q</sub>C=O, C-1), 136.3 (C<sub>q</sub>, C-8), 134.6 (C<sub>q</sub>, C-8), 131.4 (CH, C-5), 130.4 (x2 C-12, C-14), 129.5 (CH, Car), 129.0 (x2 C-11, C-15), 128.4 (C<sub>q</sub>, Car), 127.8 (CH, C-4), 126.7 (CH, Car), 123.0 (CH, C-3), 121.9 (CH, C-6), 119.5 (C<sub>q</sub>, C-9), 39.2 (CH<sub>2</sub>, C-17), 27.7 (CH<sub>2</sub>, C-16).

**HRMS (ESI<sup>+</sup>):** Calcd for C<sub>17</sub>H<sub>14</sub>NOS [M+H]<sup>+</sup> 280.0791, found 280.0712.

The physicochemical characteristics of this product were identical to the one synthesized before by our group and reported in the following reference by direct *N,S*-acetal transposition: F. Danton, M. Othman, A. M. Lawson, J. Moncol, A. Ghinet, B. Rigo, A. Daïch, *Chem. Eur. J.* **2019**, *25*, 6113–6118.

### 1-(4-(*Tert*-butyl)phenyl)-3,4-dihydro-6*H*-[1,4]thiazino[3,4-*a*]isoindol-6-one (**8b**)

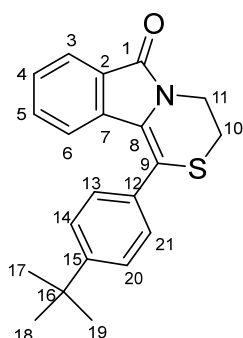

Yellow solid,  $R_f = 0.63$ , eluent (ethyl acetate / cyclohexane = 4/6), mp = 190–192 °C, 50 mg scale reaction, 43 mg was isolated, 72% yield.

**IR** ( $\nu_{\max}$  /  $\text{cm}^{-1}$ ): 1679, 1355, 1296, 976, 760, 694.

**$^1\text{H}$  NMR (300 MHz,  $\text{CDCl}_3$ )**:  $\delta_{\text{H}}$  7.81 (d,  $J = 7.5$  Hz, 1H, H-3), 7.53 – 7.39 (m, 4H, Har), 7.35 – 7.27 (td,  $J = 7.6, 1.3$  Hz, 1H, H-4), 7.21 (td,  $J = 7.6, 1.3$  Hz, 1H, H-5), 6.67 (d,  $J = 7.8$  Hz, 1H, H-6), 4.38 – 4.16 (m, 2H, H-11), 3.33 – 3.14 (m, 2H, H-10), 1.39 (s, 9H, H-17, H-18, H-19).

**$^{13}\text{C}$  NMR (75 MHz,  $\text{CDCl}_3$ )**:  $\delta_{\text{C}}$  165.7 (Cq  $\text{C}=\text{O}$ , C-1), 152.8 (Cq, C-12), 134.7 (Cq, C-7), 133.2 (Cq, C-15), 131.4 (CH, C-5), 130.0 (x2 CH, C-13, C-21), 128.4 (Cq, C-2), 127.7 (CH, C-4), 126.6 (Cq, C-8), 126.0 (x2 CH, C-14, C-20), 123.0 (CH, C-3), 122.0 (CH, C-6), 119.9 (Cq, C-9), 39.2 (CH<sub>2</sub>, C-11), 35.0 (Cq, C-16), 31.5 (3x CH<sub>3</sub>, C-17, C-18, C-19), 27.7 (CH<sub>2</sub>, C-10).

**HRMS (ESI<sup>+</sup>)**: Calcd for C<sub>21</sub>H<sub>22</sub>NOS [M+H]<sup>+</sup> 336.1417, found 336.1432.

X-ray of compound **8b**: CCDC 2433572

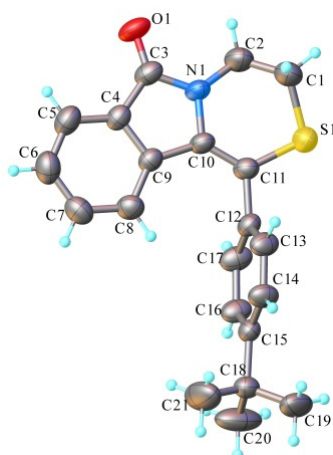

### 1-(4-Methoxyphenyl)-3,4-dihydro-6*H*-[1,4]thiazino[3,4-*a*]isoindol-6-one (**8c**)

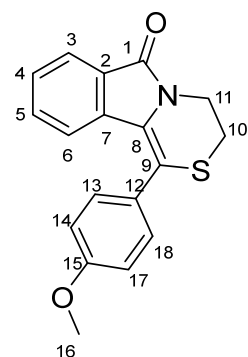

Yellow solid,  $R_f = 0.43$ , eluent (ethyl acetate / cyclohexane = 4/6), mp = 182–184 °C, 50 mg scale reaction, 39 mg was isolated, 70% yield.

**IR** ( $\nu_{\max}$  /  $\text{cm}^{-1}$ ): 1698, 1349, 1244, 974, 761, 692.

**$^1\text{H}$  NMR (300 MHz,  $\text{CDCl}_3$ )**:  $\delta_{\text{H}}$  7.81 (d,  $J = 7.5$  Hz, 1H, H-3), 7.43 (d,  $J = 8.7$  Hz, 2H, H-13, H-18), 7.31 (td,  $J = 7.5, 1.0$  Hz, 1H, H-4), 7.21 (td,  $J = 7.6, 1.3$  Hz, 1H, H-5), 6.98 (d,  $J = 8.7$  Hz, 2H, H-14, H-17), 6.71 (d,  $J = 7.7$  Hz, 1H, H-6), 4.29 – 4.19 (m, 2H, H-11), 3.88 (s, 3H, H-16), 3.25 – 3.17 (m, 1H, H-10).

**$^{13}\text{C}$  NMR (75 MHz,  $\text{CDCl}_3$ )**:  $\delta_{\text{C}}$  165.7 (Cq $\text{C}=\text{O}$ , C-1), 160.6 (Cq $\text{C}=\text{O}$ , C-15), 134.6 (Cq, C-7), 131.7 (CH, C-5), 131.4 (x2 CH, C-13, C-18), 128.3 (Cq, C-12), 128.3 (Cq, C-2), 127.7 (CH, C-4), 126.5 (Cq, C-8), 123.0 (CH, C-3), 121.9 (CH, C-6), 119.7 (Cq, C-9), 114.4 (x2 CH, C-14, C-17), 55.5 (CH<sub>3</sub>, C-16), 39.2 (CH<sub>2</sub>, C-11), 27.7 (CH<sub>2</sub>, C-10).

**HRMS (ESI<sup>+</sup>)**: Calcd for C<sub>18</sub>H<sub>16</sub>NO<sub>2</sub>S [M+H]<sup>+</sup> 310.0896, found 310.0905.

### 1-(3,4,5-Trimethoxyphenyl)-3,4-dihydro-6*H*-[1,4]thiazino[3,4-*a*]isoindol-6-one (8d)

Yellow solid,  $R_f = 0.30$ , eluent (ethyl acetate / cyclohexane = 4/6), mp = 153–155 °C, 50 mg scale reaction, 59 mg was isolated, 78% yield.

**IR** ( $\nu_{\max}$  /  $\text{cm}^{-1}$ ): 1676, 1328, 1234, 947, 755, 692.

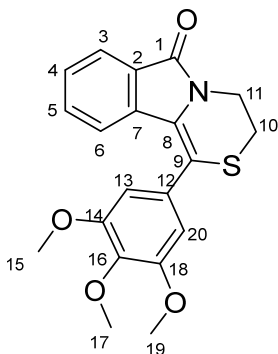

**$^1\text{H}$  NMR (300 MHz,  $\text{CDCl}_3$ ):**  $\delta_{\text{H}}$  7.82 (d,  $J = 7.4$  Hz, 1H, H-3), 7.33 (td,  $J = 7.4$ , 1.1 Hz, 1H, H-4), 7.32 – 7.19 (m, 1H, H-5), 6.78 (d,  $J = 7.8$  Hz, 1H, H-6), 6.74 (s, 2H, H-13, H-20), 4.27 – 4.22 (m, 2H, H-11), 3.94 (s, 3H, H-17), 3.84 (s, 6H, H-15, H-19), 3.25 – 3.20 (m, 2H, H-10).

**$^{13}\text{C}$  NMR (75 MHz,  $\text{CDCl}_3$ ):**  $\delta_{\text{C}}$  165.7 ( $\text{C}_{\text{qC=O}}$ , C-1), 153.7 ( $\text{C}_{\text{q}}$ , C-15), 139.0 ( $\text{C}_{\text{q}}$ , C-14, C-18), 134.5 ( $\text{C}_{\text{q}}$ , C-7), 131.6 ( $\text{C}_{\text{q}}$ , C-12), 131.5 (CH, C-5), 128.4 ( $\text{C}_{\text{q}}$ , C-2), 128.0 (CH, C-4), 126.7 ( $\text{C}_{\text{q}}$ , C-8), 123.1 (CH, C-3), 122.2 (CH, C-6), 119.4 ( $\text{C}_{\text{q}}$ , C-9), 107.3 (2x CH, C-13, C-20), 61.2 ( $\text{CH}_3$ , C-17), 56.4 (2x  $\text{CH}_3$ , C-15, C-19), 39.2 ( $\text{CH}_2$ , C-9), 27.7 ( $\text{CH}_2$ , C-10).

**HRMS (ESI<sup>+</sup>):** Calcd for  $\text{C}_{20}\text{H}_{20}\text{NO}_4\text{S}$  [ $\text{M}+\text{H}$ ]<sup>+</sup> 370.1108, found 370.1116.

X-ray of compound **8d**: CCDC 2433573

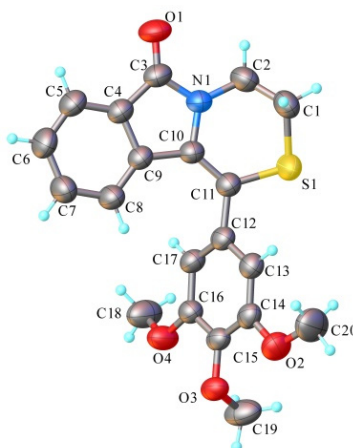

### 1-(4-Nitrophenyl)-3,4-dihydro-6*H*-[1,4]thiazino[3,4-*a*]isoindol-6-one (8e)

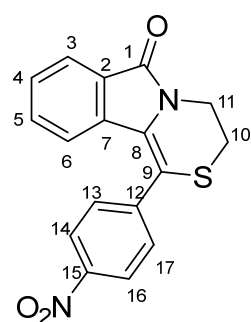

Red solid,  $R_f = 0.45$ , eluent (ethyl acetate / cyclohexane = 4/6), mp = 262–264 °C, 50 mg scale reaction (in 60 mL of toluene), 45 mg was isolated, 78% yield.

**IR** ( $\nu_{\max}$  /  $\text{cm}^{-1}$ ): 1688, 1338, 1259, 971, 763, 691.

**$^1\text{H}$  NMR (300 MHz,  $\text{CDCl}_3$ ):**  $\delta_{\text{H}}$  8.34 (d,  $J = 8.8$  Hz, 2H, H-14, H-16), 7.84 (d,  $J = 7.6$  Hz, 1H, H-3), 7.74 (d,  $J = 8.7$  Hz, 2H, H-13, H-17), 7.38 (t,  $J = 7.4$  Hz, 1H, H-4), 7.27 – 7.21 (m, 1H, H-5), 6.63 (d,  $J = 7.9$  Hz, 1H, H-6), 4.35 – 4.22 (m, 2H, H-11), 3.34 – 3.22 (m, 2H, H-10).

**$^{13}\text{C}$  NMR (75 MHz,  $\text{CDCl}_3$ ):**  $\delta_{\text{C}}$  165.7 ( $\text{C}_{\text{qC=O}}$ , C-1), 148.4 ( $\text{C}_{\text{q}}$ , C-15), 143.3 ( $\text{C}_{\text{q}}$ , C-12), 134.1 ( $\text{C}_{\text{q}}$ , C-7), 131.8 (2x CH, C-13, C-17), 131.7 (CH, C-5), 128.7 ( $\text{C}_{\text{q}}$ , C-8), 128.5 (CH, C-4), 127.9 ( $\text{C}_{\text{q}}$ , C-2), 124.3 (2x CH, C-14, C-16), 123.5 (CH, C-3), 121.7 (CH, C-6), 116.3, 100.1 ( $\text{C}_{\text{q}}$ , C-9), 39.3 ( $\text{CH}_2$ , C-11), 27.6 ( $\text{CH}_2$ , C-10).

**HRMS (ESI<sup>+</sup>):** Calcd for  $\text{C}_{17}\text{H}_{13}\text{N}_2\text{O}_3\text{S}$  [ $\text{M}+\text{H}$ ]<sup>+</sup> 325.0641, found 325.0651.

### 1-([1,1'-Biphenyl]-4-yl)-3,4-dihydro-6H-[1,4]thiazino[3,4-a]isoindol-6-one (8f)

Yellow solid,  $R_f = 0.64$ , eluent (ethyl acetate / cyclohexane = 4/6), mp = 228–230 °C, 50 mg scale reaction, 59 mg was isolated, 93% yield.

**IR** ( $\nu_{\max}$  /  $\text{cm}^{-1}$ ): 1691, 1357, 1240, 974, 760, 693.

**$^1\text{H}$  NMR (300 MHz,  $\text{CDCl}_3$ )**:  $\delta_{\text{H}}$  7.84 (d,  $J = 7.5$  Hz, 1H, H-3), 7.71 (t,  $J = 7.8$  Hz, 4H, H-13, H-14, H-22, H-23), 7.61 (d,  $J = 8.0$  Hz, 2H, H-17, H-21), 7.50 (t,  $J = 7.5$  Hz, 2H, H-18, H-20), 7.40 (t,  $J = 7.3$  Hz, 1H, H-19), 7.33 (t,  $J = 7.4$  Hz, 1H, H-4), 7.22 (t,  $J = 7.5$  Hz, 1H, H-5), 6.79 (d,  $J = 7.9$  Hz, 1H, H-6), 4.36 – 4.20 (m, 2H, H-11), 3.34 – 3.19 (m, 2H, H-10).

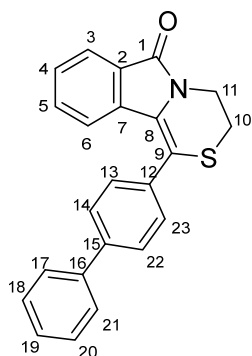

**$^{13}\text{C}$  NMR (75 MHz,  $\text{CDCl}_3$ )**:  $\delta_{\text{C}}$  165.7 (Cq  $\text{C}=\text{O}$ , C-1), 142.2 (Cq, C-15), 140.2 (Cq, C-16), 135.2 (Cq, C-12), 134.6 (Cq, C-8), 131.5 (CH, C-5), 130.9 (x2 CH, C-18, C-20), 129.1 (x2 CH, C-13, C-23), 128.4 (Cq, C-7), 127.9 (Cq, C-2), 127.9 (CH, C-4), 127.6 (x2 CH, C-17, C-21), 127.2 (x2 CH, C-14, C-22), 126.8 (Cq, C-8), 123.1 (CH, C-3), 122.0 (CH, C-6), 119.3 (Cq, C-10), 39.2 ( $\text{CH}_2$ , C-11), 27.7 ( $\text{CH}_2$ , C-10).

**HRMS (ESI<sup>+</sup>)**: Calcd for  $\text{C}_{23}\text{H}_{18}\text{NOS}$   $[\text{M}+\text{H}]^+$  356.1104, found 356.1118.

X-ray of compound **8f**: CCDC 2433574

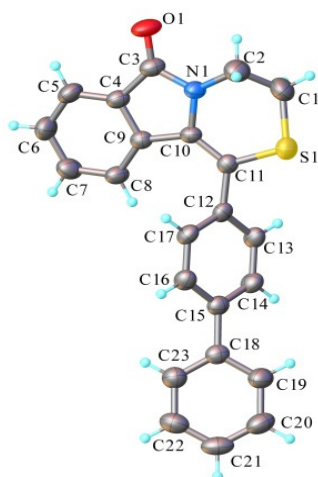

### Methyl 4-(6-oxo-3,4-dihydro-6H-[1,4]thiazino[3,4-a]isoindol-1-yl)benzoate (8g)

Yellow solid,  $R_f = 0.43$ , eluent (ethyl acetate / cyclohexane = 4/6), mp = 200–202 °C, 50 mg scale reaction, 44 mg was isolated, 74% yield.

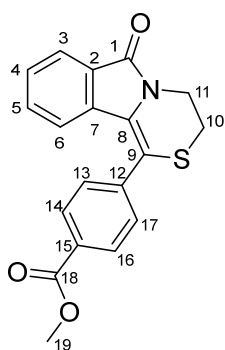

**IR** ( $\nu_{\max}$  /  $\text{cm}^{-1}$ ): 1686, 1357, 1219, 760, 691.

**$^1\text{H}$  NMR (300 MHz,  $\text{CDCl}_3$ )**:  $\delta_{\text{H}}$  8.14 (d,  $J = 8.4$  Hz, 2H, H-14, H-15), 7.82 (d,  $J = 7.5$  Hz, 1H, H-3), 7.62 (d,  $J = 8.4$  Hz, 2H, H-13, H-19), 7.33 (td,  $J = 7.4, 0.9$  Hz, 1H, H-4), 7.20 (td,  $J = 7.7, 1.2$  Hz, 1H, H-5), 6.61 (d,  $J = 7.9$  Hz, 1H, H-6), 4.35 – 4.17 (m, 2H, H-11), 3.97 (s, 3H, H-17), 3.31 – 3.16 (m, 2H).

**$^{13}\text{C}$  NMR (75 MHz,  $\text{CDCl}_3$ )**:  $\delta_{\text{C}}$  166.7 (Cq  $\text{C}=\text{O}$ , C-18), 165.8 (Cq  $\text{C}=\text{O}$ , C-1), 141.1 (Cq, C-15), 134.3 (Cq, C-12), 131.6 (Cq, C-7), 131.0 (CH, C-5), 130.6 (2xCH, C-13, C-17), 130.3 (2xCH, C-14, C-16), 128.4 (Cq, C-8), 128.3 (CH, C-4), 127.2 (Cq,

C-2), 123.2 (CH, C-3), 121.9 (CH, C-6), 118.0 (Cq, C-9), 52.5 (CH<sub>3</sub>, C-19), 39.3 (CH<sub>2</sub>, C-11), 27.6 (CH<sub>2</sub>, C-10).

**HRMS (ESI<sup>+</sup>):** Calcd for C<sub>19</sub>H<sub>15</sub>NO<sub>3</sub>S [M+H]<sup>+</sup> 338.0845, found 338.0852.

### 1-(Naphthalen-1-yl)-3,4-dihydro-6H-[1,4]thiazino[3,4-a]isoindol-6-one (8h)

Yellow solid, R<sub>f</sub> = 0.39, eluent (ethyl acetate / cyclohexane = 3/7), mp = 175–177 °C, 50 mg scale reaction, 55 mg was isolated, 94% yield.

**IR (ν<sub>max</sub> / cm<sup>-1</sup>):** 1694, 1355, 1238, 966, 763, 691.

**<sup>1</sup>H NMR (300 MHz, CDCl<sub>3</sub>):** δ<sub>H</sub> 8.04 – 7.90 (m, 3H, H-14, H-17, H-19), 7.80 (d, *J* = 7.6 Hz, 1H, H-3), 7.62 – 7.55 (m, 2H, Har), 7.55 – 7.49 (m, 1H, Har), 7.49 – 7.42 (m, 1H, Har), 7.26 – 7.19 (m, 1H, H-4), 7.03 – 6.93 (m, 1H, H-5), 5.93 (d, *J* = 7.9 Hz, 1H, H-6), 4.45 (ddd, *J* = 13.4, 6.3, 3.7 Hz, 1H, H-11), 4.29 (ddd, *J* = 13.4, 7.3, 3.8 Hz, 1H, H-11), 3.47 – 3.26 (m, 2H, H-10).

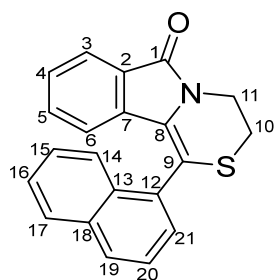

**<sup>13</sup>C NMR (75 MHz, CDCl<sub>3</sub>):** δ<sub>C</sub> 166.0 (C<sub>q</sub>C=O, C-1), 134.4 (C<sub>q</sub>, C-7), 134.0 (C<sub>q</sub>, Car), 133.5 (C<sub>q</sub>, Car), 131.9 (C<sub>q</sub>, Car), 131.7 (CH, C-5), 129.9 (CH, Car), 128.7 (CH, Car), 128.6 (CH, Car), 128.4 (C<sub>q</sub>, C-8), 128.3 (C<sub>q</sub>, C-2), 127.9 (CH, C-4), 127.1 (CH, Car), 126.7 (CH, Car), 125.9 (CH, Car), 125.2 (CH, Car), 123.0 (CH, C-3), 122.1 (CH, C-6), 116.3 (C<sub>q</sub>, C-9), 39.4 (CH<sub>2</sub>, C-9), 27.8 (CH<sub>2</sub>,

C-10).

**HRMS (ESI<sup>+</sup>):** Calcd for C<sub>21</sub>H<sub>16</sub>NOS [M+H]<sup>+</sup> 330.0947, found 330.096.

X-ray of compound **8h**: CCDC 2433575

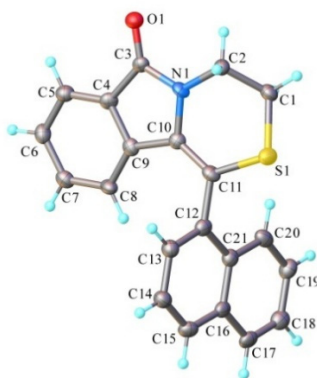

### 1-(Pyren-4-yl)-3,4-dihydro-6H-[1,4]thiazino[3,4-a]isoindol-6-one (8i)

Yellow solid, R<sub>f</sub> = 0.62, eluent (ethyl acetate / cyclohexane = 4/6), mp = 279–281 °C, 50 mg scale reaction, 56 mg was isolated, 79% yield.

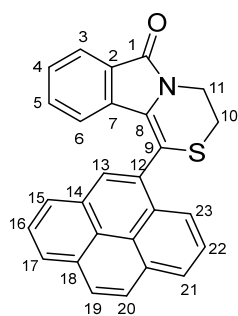

**IR (ν<sub>max</sub> / cm<sup>-1</sup>):** 1678, 1355, 1244, 980, 727, 695.

**<sup>1</sup>H NMR (300 MHz, CDCl<sub>3</sub>):** δ<sub>H</sub> 8.33 – 8.17 (m, 3H, Har), 8.22 – 8.09 (m, 3H, Har), 8.13 – 7.98 (m, 3H, Har), 7.81 (d, *J* = 7.6 Hz, 1H, H-3), 7.19 (t, *J* = 7.5 Hz, 1H, H-4), 6.81 (t, *J* = 7.7 Hz, 1H, H-5), 5.71 (d, *J* = 8.0 Hz, 1H, H-6), 4.44 (t, *J* = 5.2 Hz, 2H, H-11), 3.43 (q, *J* = 4.6 Hz, 2H, H-10).

**<sup>13</sup>C NMR (75 MHz, CDCl<sub>3</sub>):** δ<sub>C</sub> 166.0 (C<sub>q</sub>C=O, C-1), 134.4 (C<sub>q</sub>, C-7), 132.2 (C<sub>q</sub>, Car), 131.7 (CH, C-5), 131.3 (C<sub>q</sub>, Car), 131.1 (C<sub>q</sub>, Car), 130.4 (C<sub>q</sub>, Car), 130.0 (C<sub>q</sub>, Car), 128.8 (C<sub>q</sub>, C-8), 128.6 (x2 C<sub>q</sub>, Car; CH, Car), 128.4 (CH, Car), 128.4

(Cq, C-2), 127.9 (CH, C-4), 127.4 (CH, Car), 126.5 (CH, Car), 125.8 (CH, Car), 125.8 (CH, Car), 125.3 (Cq, Car), 125.1 (Cq, Car), 124.8 (Cq, Car), 124.4 (CH, Car), 123.0 (CH, C-3), 121.9 (CH, C-6), 116.9 (Cq, C-10), 39.4 (CH<sub>2</sub>, C-9), 28.0 (CH<sub>2</sub>, C-10).

**HRMS (ESI<sup>+</sup>):** Calcd for C<sub>27</sub>H<sub>18</sub>NOS [M+H]<sup>+</sup> 404.1104, found 404.1119.

X-ray of compound **8i**: CCDC 2433576

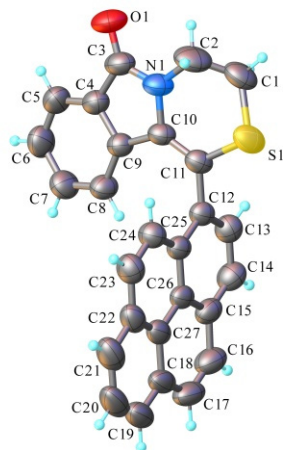

### 1-(1-Methyl-1H-indol-5-yl)-3,4-dihydro-6H-[1,4]thiazino[3,4-a]isoindol-6-one (**8k**)

Yellow solid, R<sub>f</sub> = 0.27, eluent (ethyl acetate / cyclohexane = 3/7), mp = 238–240 °C, 50 mg scale reaction, 45 mg was isolated, 55% yield.

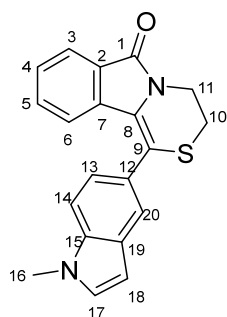

**IR (ν<sub>max</sub> / cm<sup>-1</sup>):** 1671, 1353, 1241, 980, 763, 693.

**<sup>1</sup>H NMR (300 MHz, CDCl<sub>3</sub>):** δ<sub>H</sub> 7.85 – 7.78 (m, 2H, H-3, H-20), 7.41 (d, *J* = 8.5 Hz, 1H, H-14), 7.35 (dd, *J* = 8.5, 1.6 Hz, 1H, H-13), 7.34 – 7.24 (m, 1H, H-4), 7.17 – 7.07 (m, 2H, H-5, H-17), 6.61 (d, *J* = 7.9 Hz, 1H, H-6), 6.54 (d, *J* = 3.0 Hz, 1H, H-18), 4.29 (q, *J* = 4.8 Hz, 2H), 3.87 (s, 3H), 3.26 (t, *J* = 5.2 Hz, 2H).

**<sup>13</sup>C NMR (75 MHz, CDCl<sub>3</sub>):** δ<sub>C</sub> 165.7 (Cq<sub>C=O</sub>, C-1), 137.2 (Cq, C-15), 134.9 (Cq, C-7), 131.3 (CH, C-5), 130.1 (CH, C-17), 128.8 (Cq, C-15), 128.3 (Cq, C-2), 127.5 (CH, C-4), 127.0 (Cq, C-12), 126.4 (Cq, C-8), 123.8 (CH, C-13), 123.1 (CH, C-20), 122.9 (CH, C-3), 122.1 (CH, C-6), 121.7, 109.8 (CH, C-14), 101.8 (CH, C-18), 39.3 (CH<sub>2</sub>, C-11), 33.2 (CH<sub>3</sub>, C-16), 28.0 (CH<sub>2</sub>, C-10).

**HRMS (ESI<sup>+</sup>):** Calcd for C<sub>20</sub>H<sub>17</sub>N<sub>2</sub>OS [M+H]<sup>+</sup> 333.1056, found 333.1072.

X-ray of compound **8k**: CCDC 2433577

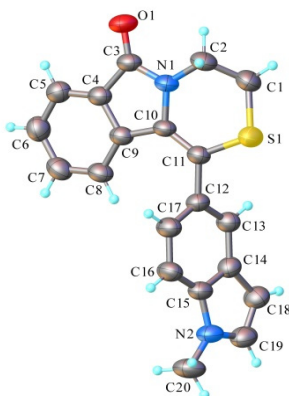

### 1-(6-Chloropyridin-2-yl)-3,4-dihydro-6H-[1,4]thiazino[3,4-a]isoindol-6-one (8l)

Yellow solid,  $R_f = 0.54$ , eluent (ethyl acetate / cyclohexane = 4/6), mp = 185–187 °C, 50 mg scale reaction, 30 mg was isolated, 54% yield.

**IR** ( $\nu_{\max}$  /  $\text{cm}^{-1}$ ): 1685, 1355, 1237, 973, 767, 696.

**$^1\text{H}$  NMR (300 MHz,  $\text{CDCl}_3$ )**:  $\delta_{\text{H}}$  8.56 (dd,  $J = 4.8, 2.0$  Hz, 1H, H-15), 7.87 – 7.77 (m, 2H, H-3, H-16), 7.43 – 7.33 (m, 2H, H-4, H-14), 7.28 – 7.20 (m, 1H, H-5), 6.28 (d,  $J = 7.8$  Hz, 1H, H-6), 4.36 (ddd,  $J = 13.5, 6.1, 3.7$  Hz, 1H, H-11), 4.19 (ddd,  $J = 13.4, 7.1, 4.0$  Hz, 1H, H-11), 3.37 – 3.20 (m, 2H, H-10).

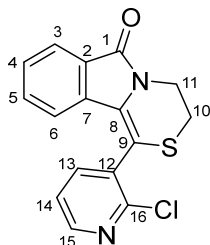

**$^{13}\text{C}$  NMR (75 MHz,  $\text{CDCl}_3$ )**:  $\delta_{\text{C}}$  165.9 ( $\text{C}_{\text{qC=O}}$ , C-1), 151.8 (Cq, C-12), 150.5 (CH, C-15), 141.2 (CH, C-13), 134.1 (Cq, C-7), 132.1 (CH, C-5), 131.8 (Cq, C-16), 129.0 (Cq, C-8), 128.6 (CH, C-4), 128.4 (Cq, C-2), 123.4 (CH, C-3), 123.0 (CH, C-14), 121.3 (CH, C-6), 112.4 (Cq, C-9), 39.4 ( $\text{CH}_2$ , C-11), 27.5 ( $\text{CH}_2$ , C-10).

**HRMS (ESI<sup>+</sup>)**: Calcd for  $\text{C}_{16}\text{H}_{12}\text{ClN}_2\text{OS}$   $[\text{M}+\text{H}]^+$  315.0353, found 315.0365.

**VIII. General procedure for the synthesis of 3,4-dihydro-6H-pyrrolo[2,1-c][1,4]thiazin-6-ones (8l-n) by the Suzuki-Miyaura coupling of halogenated substrate 7bB, 7cB or 7dB and phenylboronic acid (16a).**

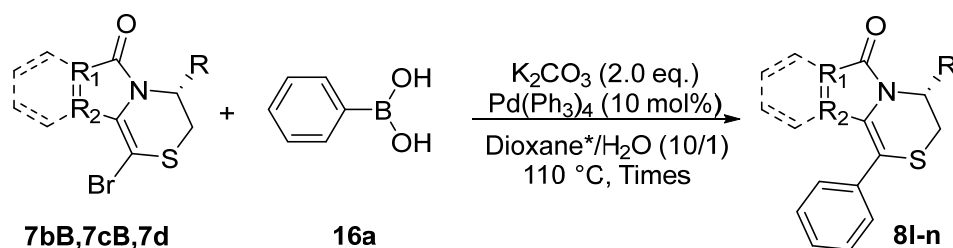

The experimental procedure used herein with 7bB, 7cB and 7dB as starting materials is same as the one described before starting from the bromothiazine compound 7aB.

### Ethyl (R)-6-oxo-1-phenyl-3,4-dihydro-6H-[1,4]thiazino[3,4-a]isoindole-4-carboxylate (8m)

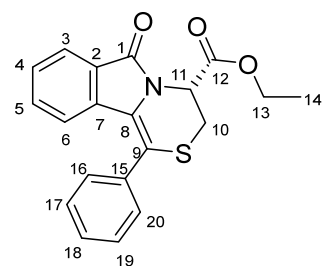

Yellow solid,  $R_f = 0.61$ , eluent (ethyl acetate / cyclohexane = 4/6), mp = 181–183 °C, 50 mg scale reaction in toluene, 30 mg was isolated, 60% yield.

\*This reaction was performed in toluene instead of dioxane.

**IR** ( $\nu_{\max}$  /  $\text{cm}^{-1}$ ): 1740, 1701, 1206, 1018, 748, 698.

**$^1\text{H}$  NMR (300 MHz,  $\text{CDCl}_3$ )**:  $\delta_{\text{H}}$  7.84 (d,  $J = 7.5$  Hz, 1H, H-3), 7.45 (dt,  $J = 15.7, 7.9$  Hz, 5H, Har), 7.33 (t,  $J = 7.4$  Hz, 1H, H-4), 7.25 – 7.18 (m, 1H, H-5), 6.62 (d,  $J = 7.9$  Hz, 1H, H-6), 5.62 (t,  $J = 3.3$  Hz, 1H, H-11), 4.42 – 4.13 (m, 2H, H-13), 3.59 (dd,  $J = 13.0, 3.1$  Hz, 1H, H-10), 3.44 (dd,  $J = 13.0, 3.6$  Hz, 1H, H-10), 1.27 (t,  $J = 7.1$  Hz, 3H, H-14).

**$^{13}\text{C}$  NMR (75 MHz,  $\text{CDCl}_3$ )**:  $\delta_{\text{C}}$  167.9 ( $\text{C}_{\text{qC=O}}$ , C-12), 165.9 ( $\text{C}_{\text{qC=O}}$ , C-1), 135.9 (Cq, C-15), 134.9 (Cq, C-7), 131.8 (CH, C-5), 130.6 (CH, Car), 130.1 (CH, Car), 129.6 (CH, Car), 129.3 (CH, Car), 128.8 (CH, Car), 128.0 (CH, C-4), 128.0 (Cq, Car), 126.2 (Cq, C-8), 123.4 (CH, C-3), 122.1 (CH, C-6), 118.7 (Cq, C-9), 62.3 ( $\text{CH}_2$ , C-13), 50.6 (CH, C-11), 29.6 ( $\text{CH}_2$ , C-10), 14.3 ( $\text{CH}_3$ , C-14).

**HRMS (ESI<sup>+</sup>)**: Calcd for  $\text{C}_{20}\text{H}_{18}\text{NO}_3\text{S}$   $[\text{M}+\text{H}]^+$  352.1002, found 352.1016.

$[\alpha]_{\text{D}}^{25} = -64.2$  (c 0.105 g/100 mL,  $\text{CH}_2\text{Cl}_2$ ).

### 1-(5,6-Diphenyl-2,3-dihydro-4*H*-1,4-thiazin-4-yl)ethan-1-one (**8n**)

Orange solid,  $R_f = 0.72$ , eluent (ethyl acetate / cyclohexane = 4/6), mp = 124–126 °C, 50 mg scale reaction, 46 mg was isolated, 93% yield.

IR ( $\nu_{\max}$  /  $\text{cm}^{-1}$ ): 1663, 1371, 691.

$^1\text{H NMR}$  (300 MHz,  $\text{CDCl}_3$ ):  $\delta_{\text{H}}$  7.24 – 7.18 (m, 3H, Har), 7.14 – 7.07 (m, 5H, Har), 7.02 – 6.97 (m, 2H, Har), 4.12 (t,  $J = 5.5$  Hz, 2H, H-10), 3.33 – 3.23 (m, 2H, H-11), 1.64 (s, 3H, H-12).

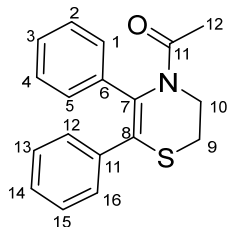

$^{13}\text{C NMR}$  (75 MHz,  $\text{CDCl}_3$ ):  $\delta_{\text{C}}$  171.6 ( $\text{C}_{\text{qC=O}}$ , C-1), 138.4 (Cq, Car), 137.9 (Cq, Car), 132.9 (Cq, C-7), 129.7 (x2 CH, Car), 129.0 (x2 CH, Car), 128.4 (x2 CH, Car), 128.2 (x2 CH, Car), 127.9 (CH, Car), 127.3 (CH, Car), 127.0 (Cq, C-8), 40.8 ( $\text{CH}_2$ , C-10), 31.6 ( $\text{CH}_2$ , C-9), 24.6 ( $\text{CH}_3$ , C-12).

HRMS ( $\text{ESI}^+$ ): Calcd for  $\text{C}_{18}\text{H}_{18}\text{NOS}$  [ $\text{M}+\text{H}$ ] $^+$  296.1104, found 296.1115.

### 8-Phenyl-3,4-dihydro-6*H*-pyrrolo[2,1-*c*][1,4]thiazin-6-one (**8o**)

Light brown solid,  $R_f = 0.44$ , eluent (ethyl acetate / cyclohexane = 4/6), mp = 103–105 °C, 50 mg scale reaction, 49 mg was isolated, 99% yield.

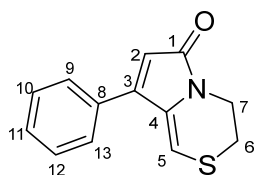

IR ( $\nu_{\max}$  /  $\text{cm}^{-1}$ ): 1665, 1353, 1095, 765, 697.

$^1\text{H NMR}$  (300 MHz,  $\text{CDCl}_3$ ):  $\delta_{\text{H}}$  7.47 – 7.36 (m, 5H, Har), 6.20 (s, 1H, H-5), 6.12 (s, 1H, H-2), 4.10 – 4.00 (m, 2H, H-7), 3.19 – 3.07 (m, 2H, H-6).

$^{13}\text{C NMR}$  (75 MHz,  $\text{CDCl}_3$ ):  $\delta_{\text{C}}$  168.3 ( $\text{C}_{\text{qC=O}}$ , C-1), 147.2 (Cq, C-8), 134.0 (Cq, C-3), 131.9 (Cq, C-4), 129.5 (CH, C-11), 129.0 (x2 CH, C-10, C-12), 128.5 (x2 CH, C-9, C-13), 117.6 (CH, C-2), 109.3 (CH, C-5), 38.5 ( $\text{CH}_2$ , C-7), 26.2 ( $\text{CH}_2$ , C-6).

HRMS ( $\text{ESI}^+$ ): Calcd for  $\text{C}_{13}\text{H}_{12}\text{NOS}$  [ $\text{M}+\text{H}$ ] $^+$  230.0634, found 230.0640.

### IX. Typical procedure for the synthesis of 1-(2-Oxo-pyrrolidin-1-yl)-3,4-dihydro-6*H*-[1,4]thiazino [3,4-*a*]isoindol-6-one (**8r**).

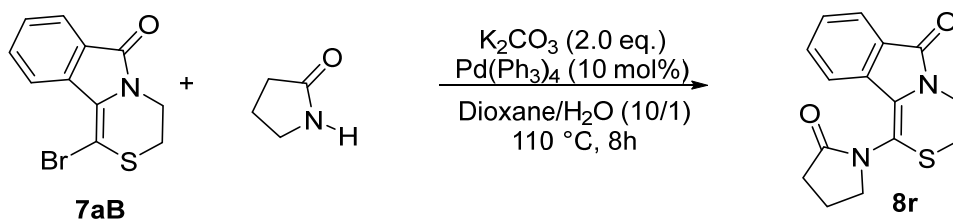

To a solution of 50 mg (0.177 mmol) of 1-bromo-3,4-dihydro-6*H*-[1,4]thiazino[3,4-*a*]isoindol-6-one (**7aB**) dissolved in 4 mL of toluene was added under stirring 0.4 mL of water. To this solution, pyrrolidin-2-one (16.59 mg, 1.1 eq.),  $\text{K}_2\text{CO}_3$  (48.92 mg, 2.0 eq.) and tetrakis(triphenylphosphine)-palladium(0) ( $\text{Pd}(\text{Ph}_3)_4$ , 20.45 mg, 10 mol%) were added under stirring and argon atmosphere. The reaction mixture was stirred at 110 °C and the reaction was monitored by NMR  $^1\text{H}$ . After completion of the reaction (8 hours), direct purification of the crude by flash chromatography to furnish the expected product, 1-(2-oxopyrrolidin-1-yl)-3,4-dihydro-6*H*-[1,4]thiazino[3,4-*a*]isoindol-6-one (**8r**), whose structure has been proven by X-ray analysis.

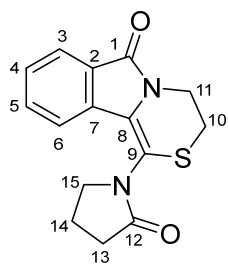

Orange solid,  $R_f = 0.51$ , eluent (ethyl acetate / cyclohexane = 4/6), mp = 258–260 °C (decomposition), 50 mg scale reaction, 34 mg was isolated, 67% yield.

IR ( $\nu_{\max}$  /  $\text{cm}^{-1}$ ): 2952, 2895, 1682, 1631, 1470, 1398, 1287, 1180, 1096, 691.

**<sup>1</sup>H NMR (300 MHz, CDCl<sub>3</sub>):** δ<sub>H</sub> 7.84 (dt, *J* = 7.6 Hz and *J* = 3.2 Hz, 1H, H-3), 7.54 (td, *J* = 8.0 Hz and *J* = 3 Hz, 1H, H-6), 7.44 (dt, *J* = 7.6 Hz and *J* = 3.2 Hz, 1H, H-4), 7.42 (td, *J* = 8.0 Hz and *J* = 3.2 Hz, 1H, H-5), 4.31 – 4.39 (m, 1H, H-11), 4.02 – 3.93 (m, 1H, H-11), 3.91 – 3.92 (m, 1H, H-10), 3.62 – 3.69 (m, 1H, H-10), 3.15 – 3.30 (m, 2H, H-15), 2.53 – 2.59 (m, 2H, H-13), 2.23 – 2.36 (m, 2H, H-14).

**<sup>13</sup>C NMR (75 MHz, CDCl<sub>3</sub>):** δ<sub>C</sub> 175.3 (C<sub>q</sub>C=O, C-12), 165.4 (C<sub>q</sub>C=O, C-1), 133.1 (C<sub>q</sub>, C-7), 132.6 (C<sub>q</sub>, C-5), 129.5 (C<sub>q</sub>, C-2), 128.8 (CH, C-3), 128.4 (CH, C-9), 123.5 (CH, C-4), 121.6 (CH, C-6), 114.8 (CH, C-8), 48.9 (CH<sub>2</sub>, C-15), 39.2 (CH<sub>2</sub>, C-11), 31.2 (CH<sub>2</sub>, C-13), 27.3 (CH<sub>2</sub>, C-10), 18.9 (CH<sub>2</sub>, C-14).

**HRMS (ESI<sup>+</sup>):** Calcd for C<sub>15</sub>H<sub>14</sub>N<sub>2</sub>O<sub>2</sub>S [M+H]<sup>+</sup> 287.0849, found 288.0882.

X-ray of compound **8r**: CCDC 2433578

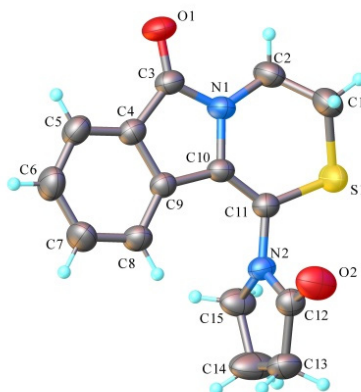

## X. Copies of NMR spectra

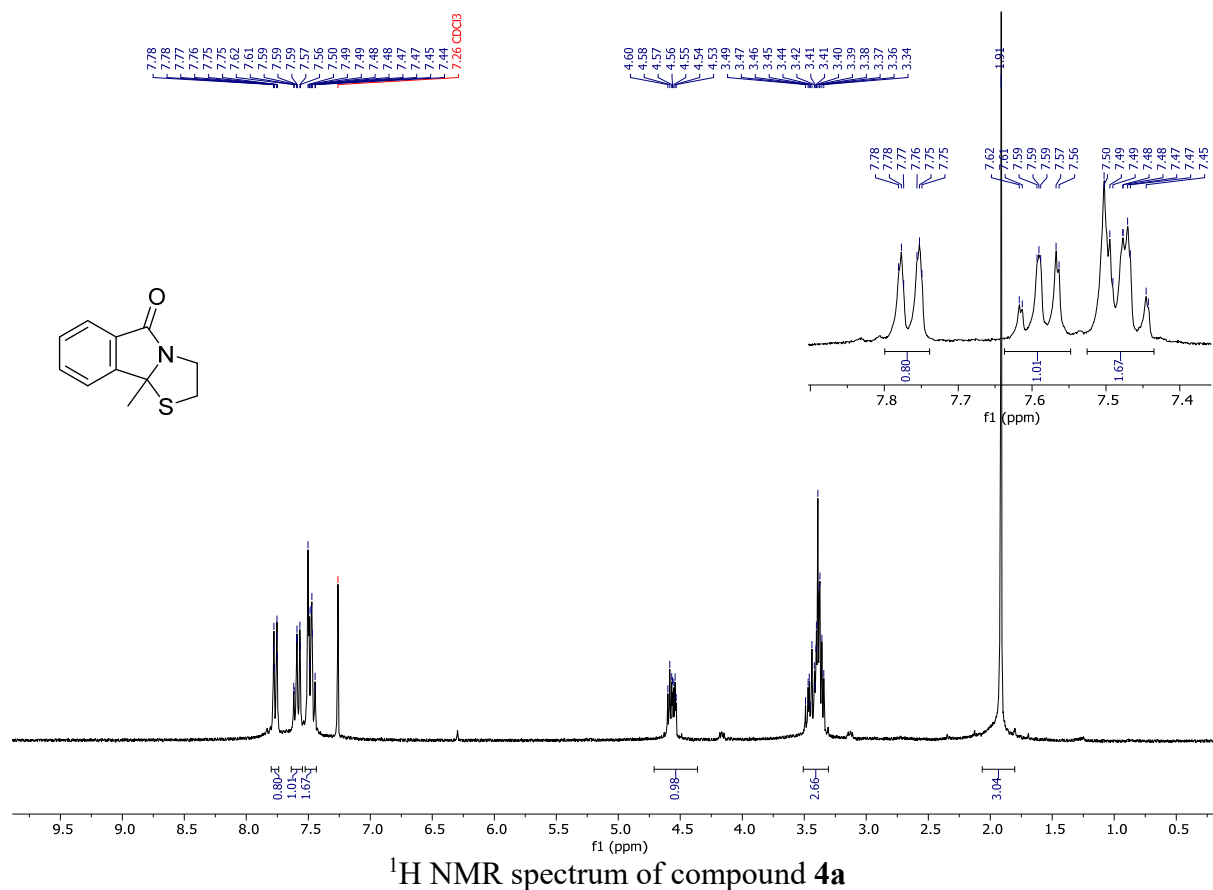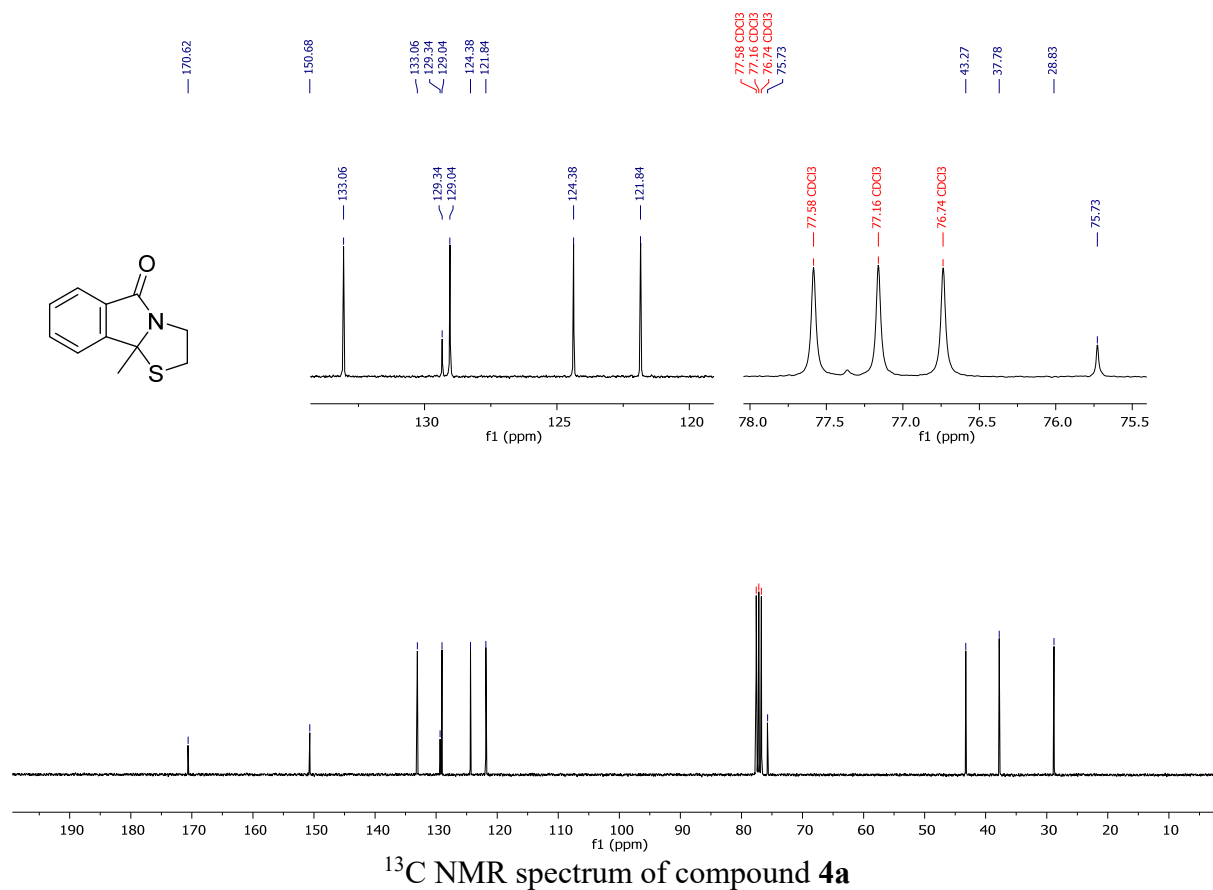

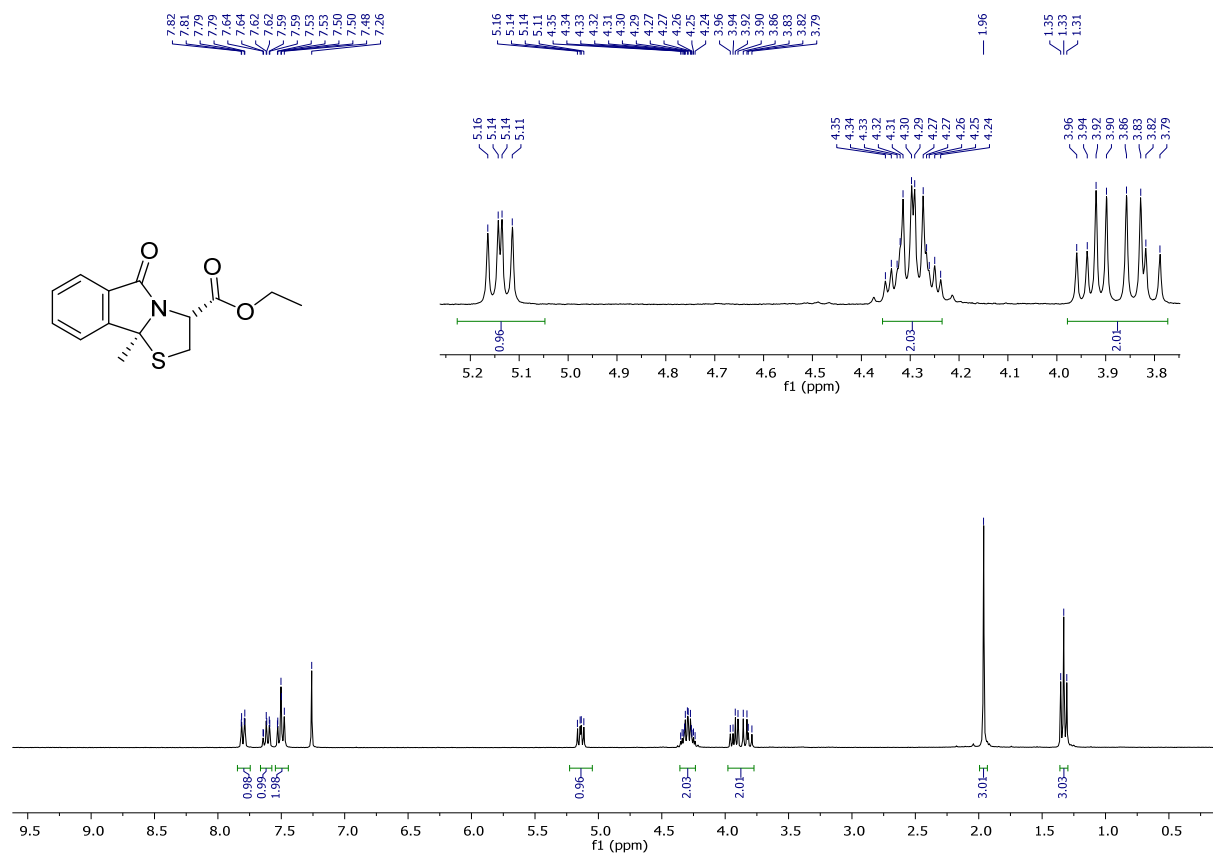

<sup>1</sup>H NMR spectrum of compound 4b

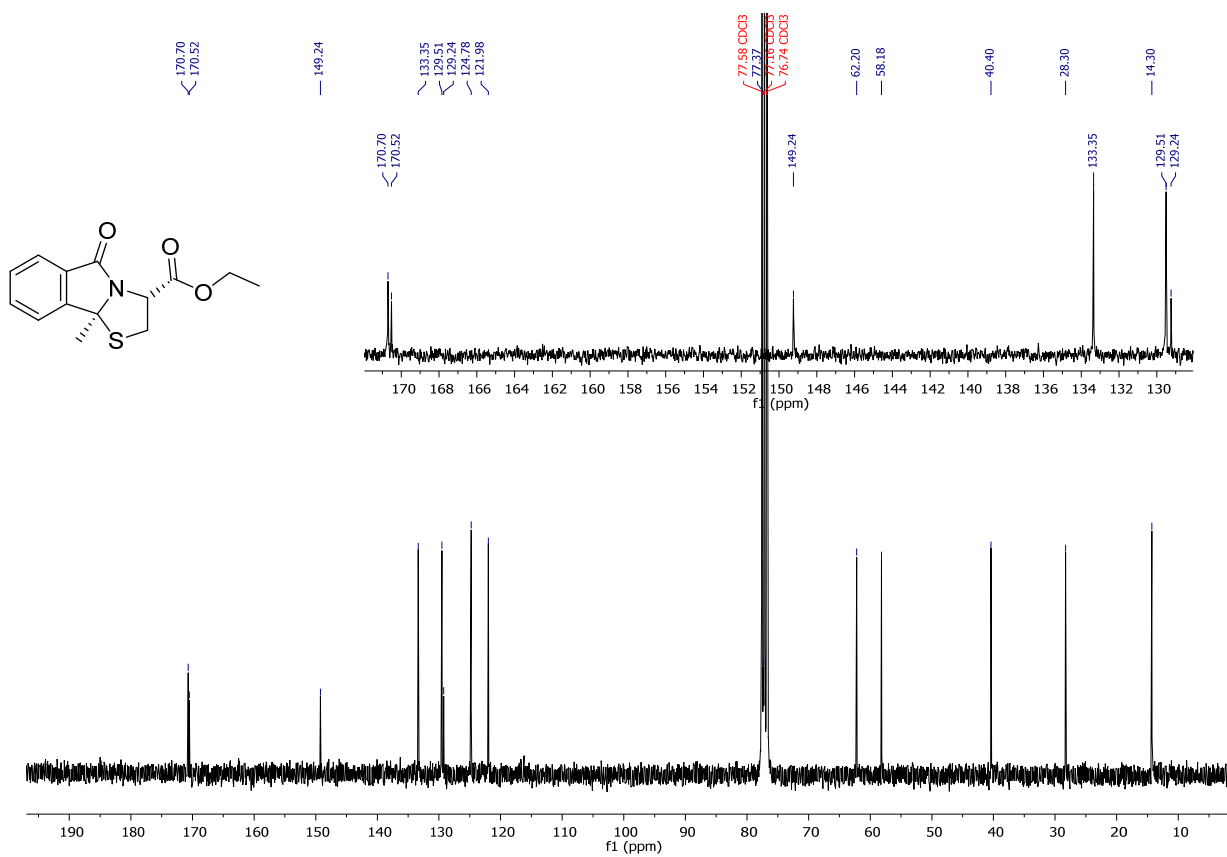

<sup>13</sup>C NMR spectrum of compound 4b

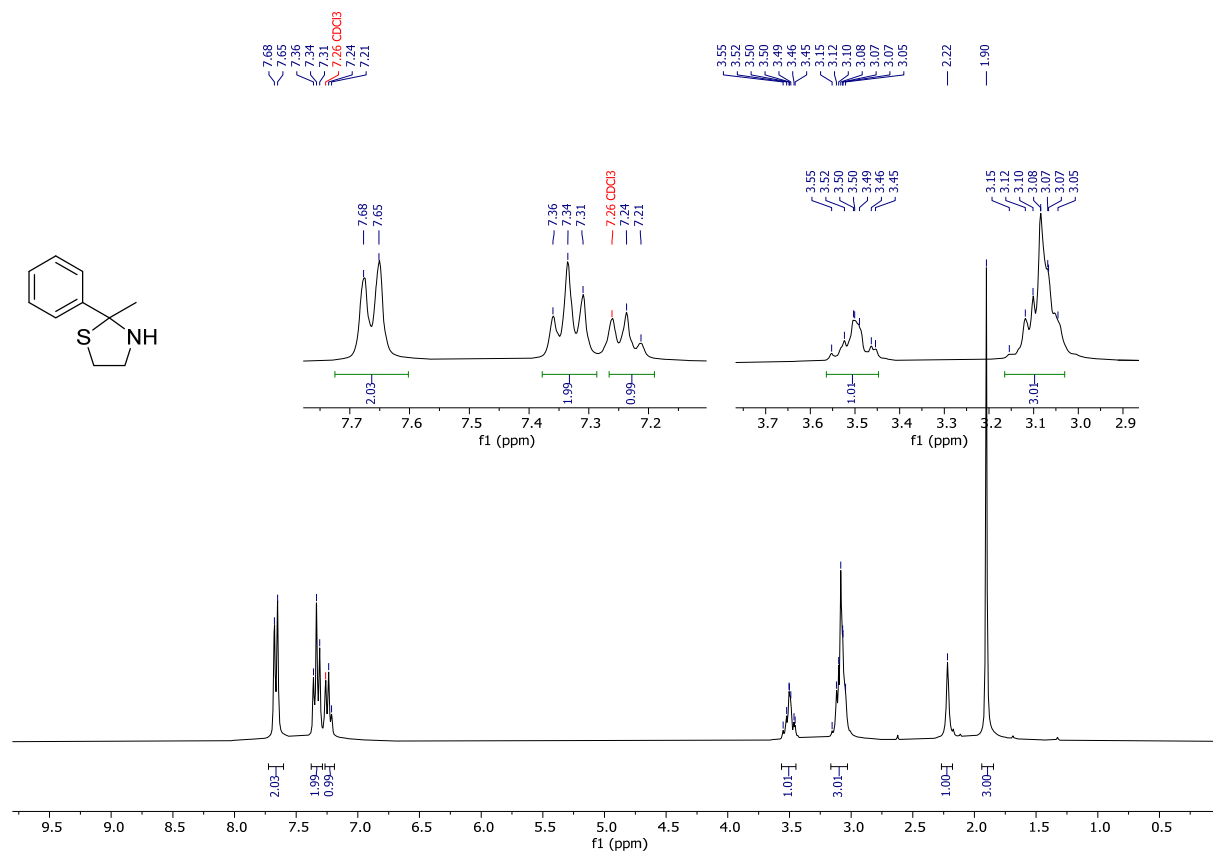

<sup>1</sup>H NMR spectrum of compound 4'c

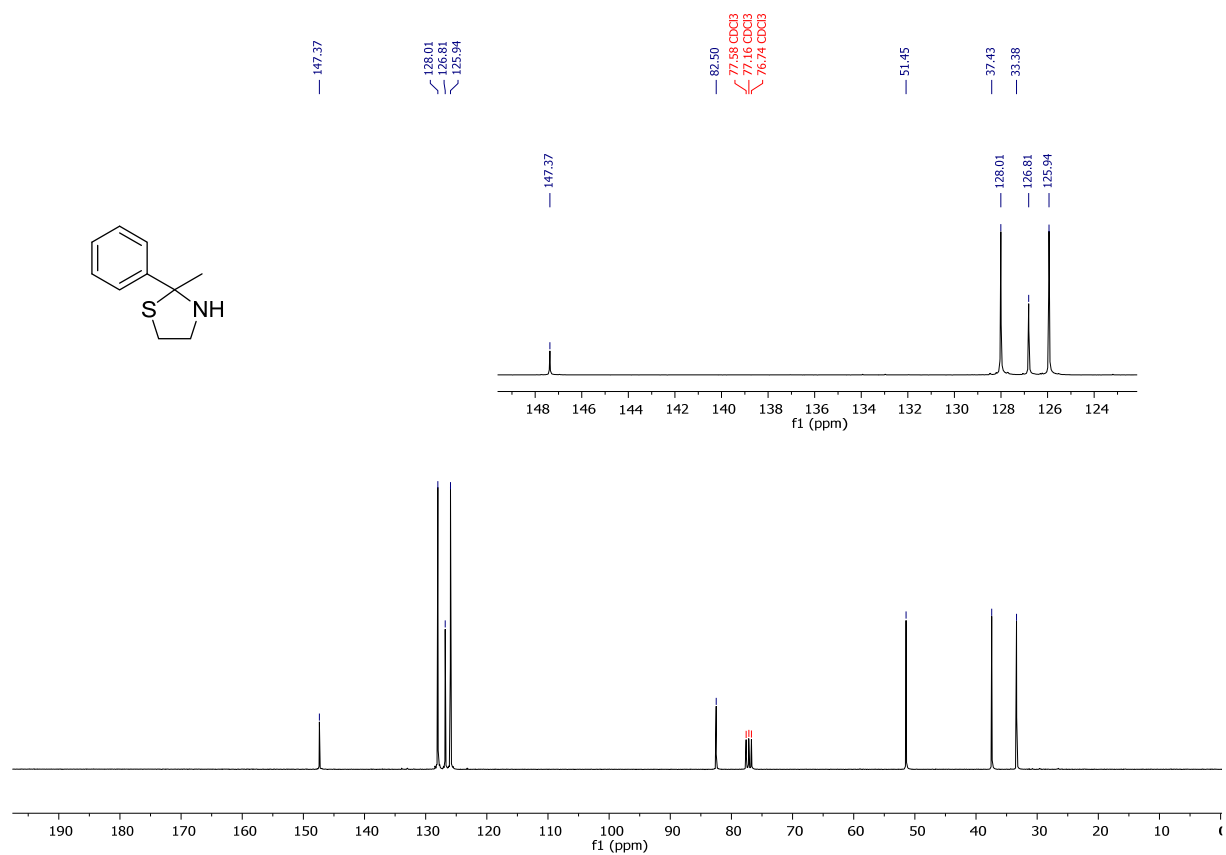

<sup>13</sup>C NMR spectrum of compound 4'c

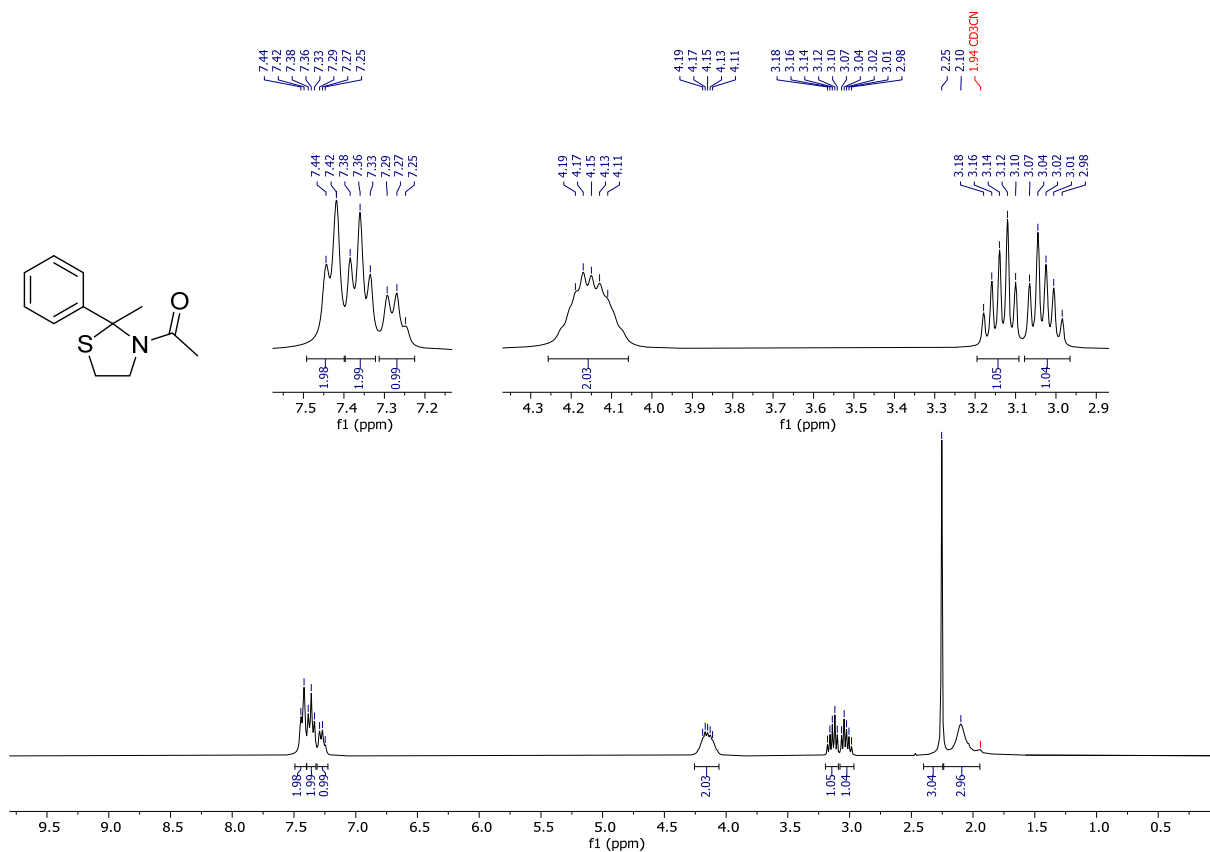

<sup>1</sup>H NMR spectrum of compound 4c

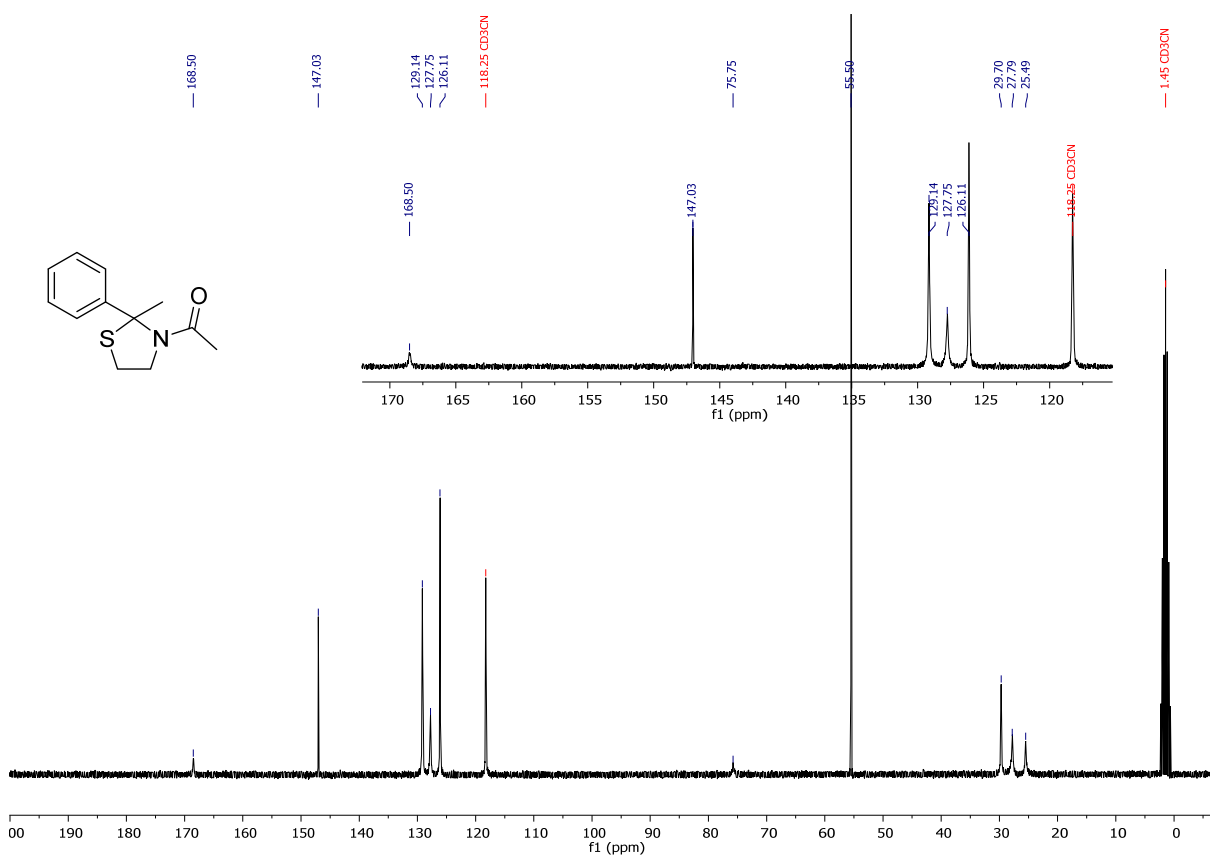

<sup>13</sup>C NMR spectrum of compound 4c

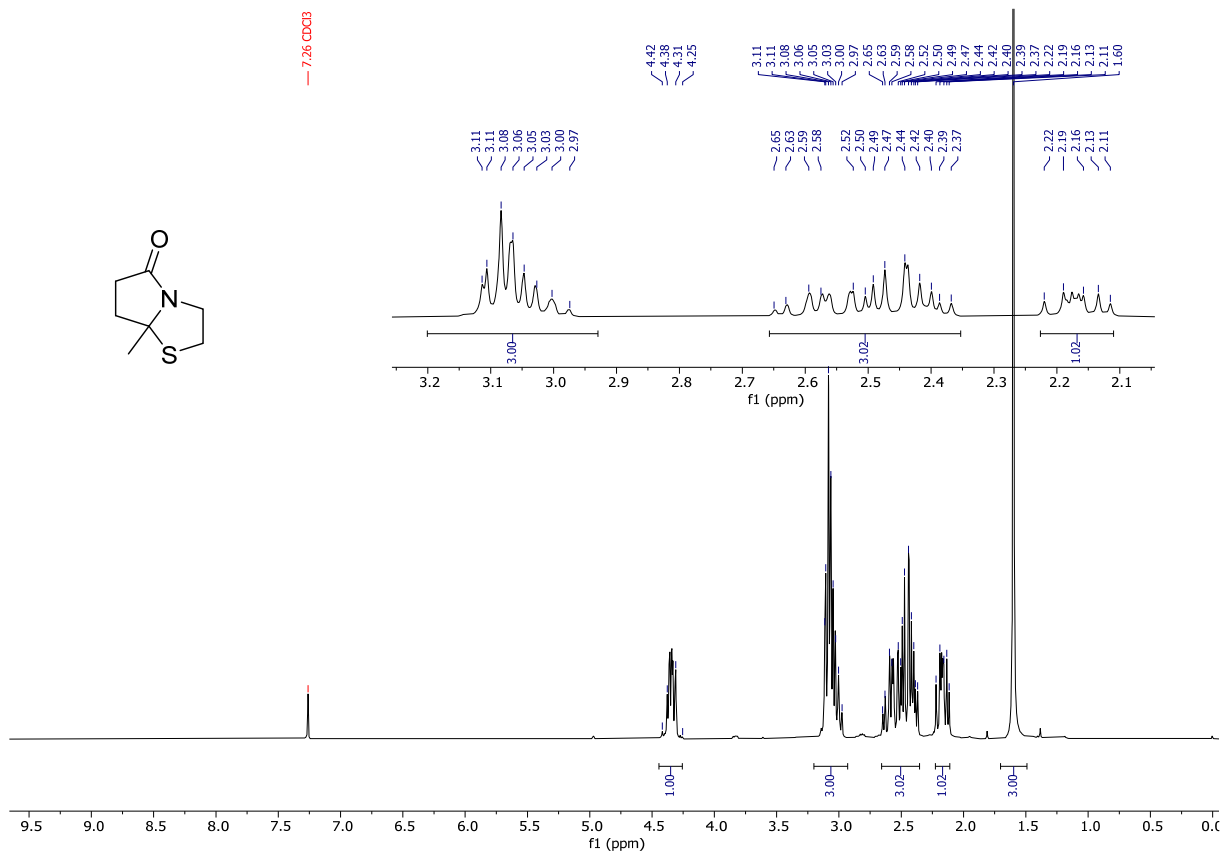

<sup>1</sup>H NMR spectrum of compound 4d

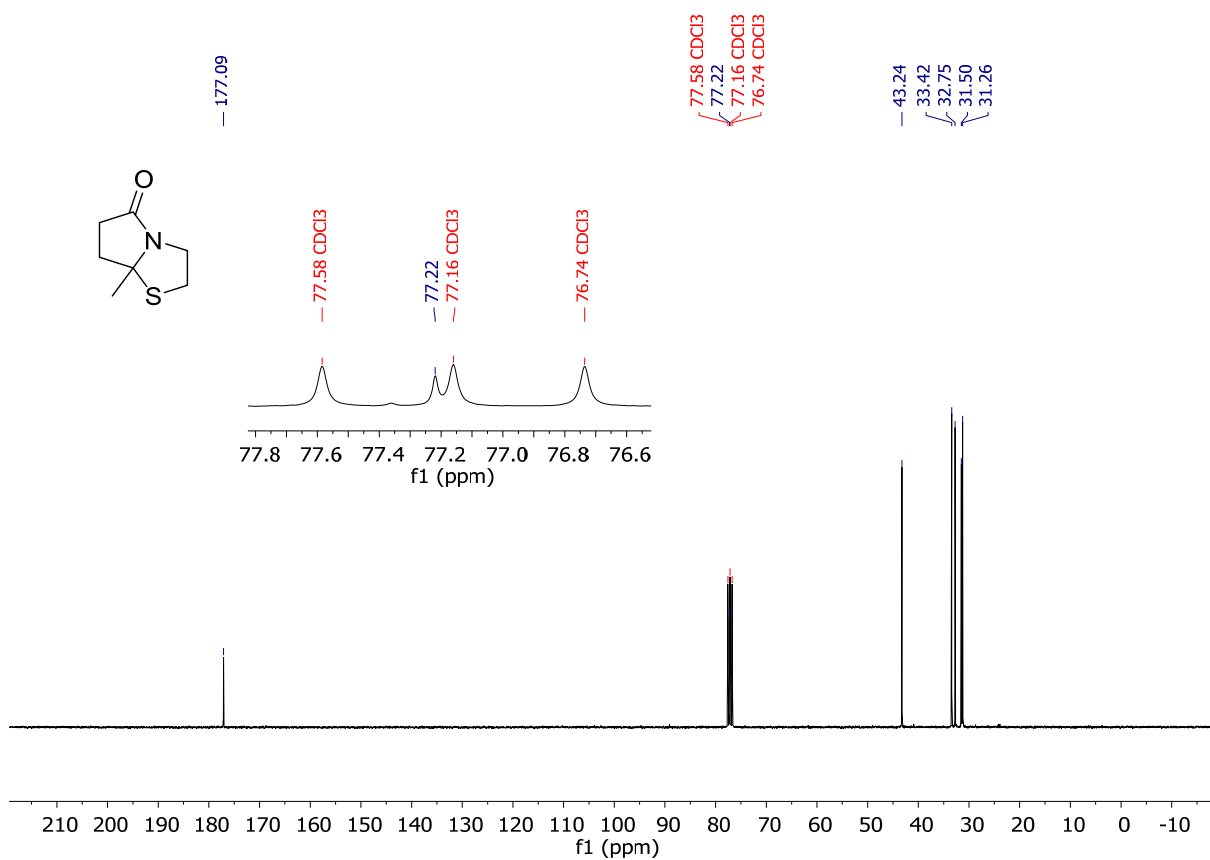

<sup>13</sup>C NMR spectrum of compound 4d

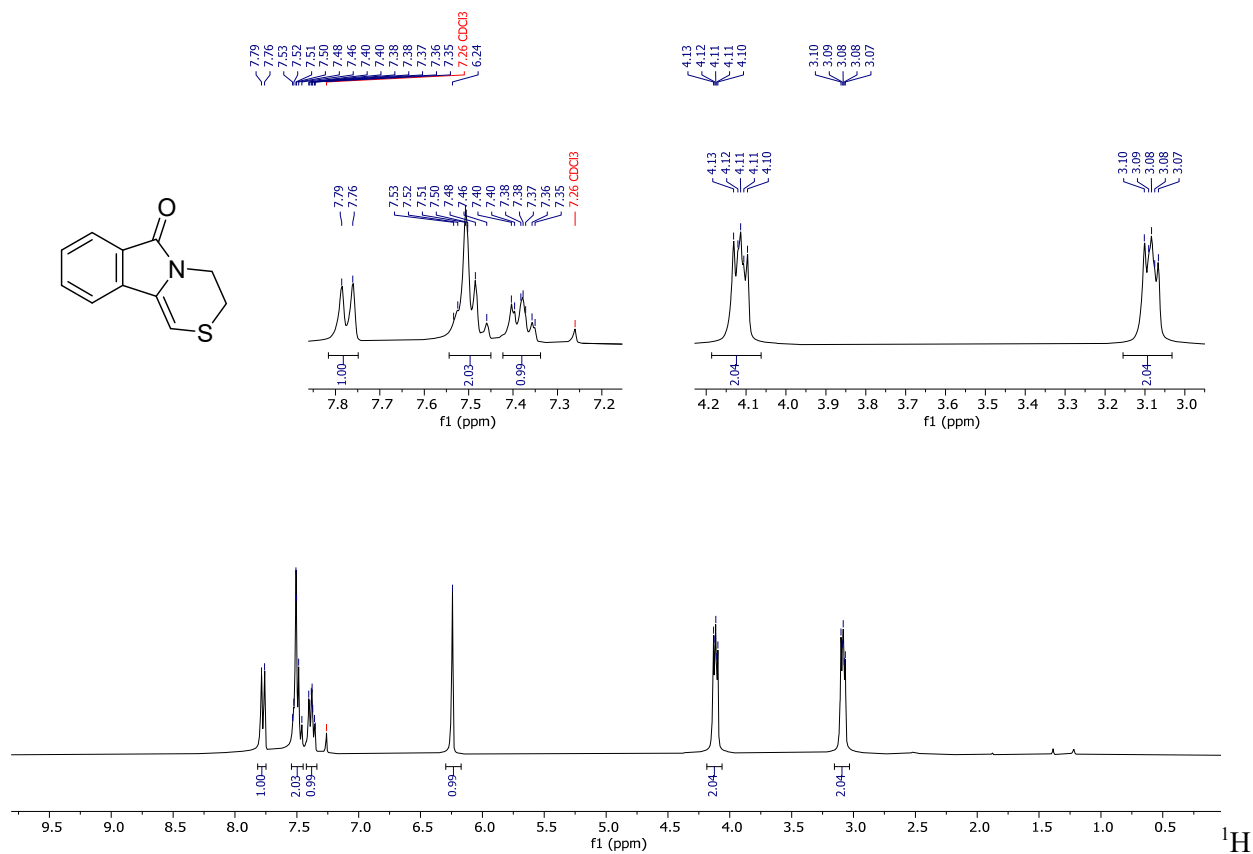

<sup>1</sup>H NMR spectrum of compound 5a

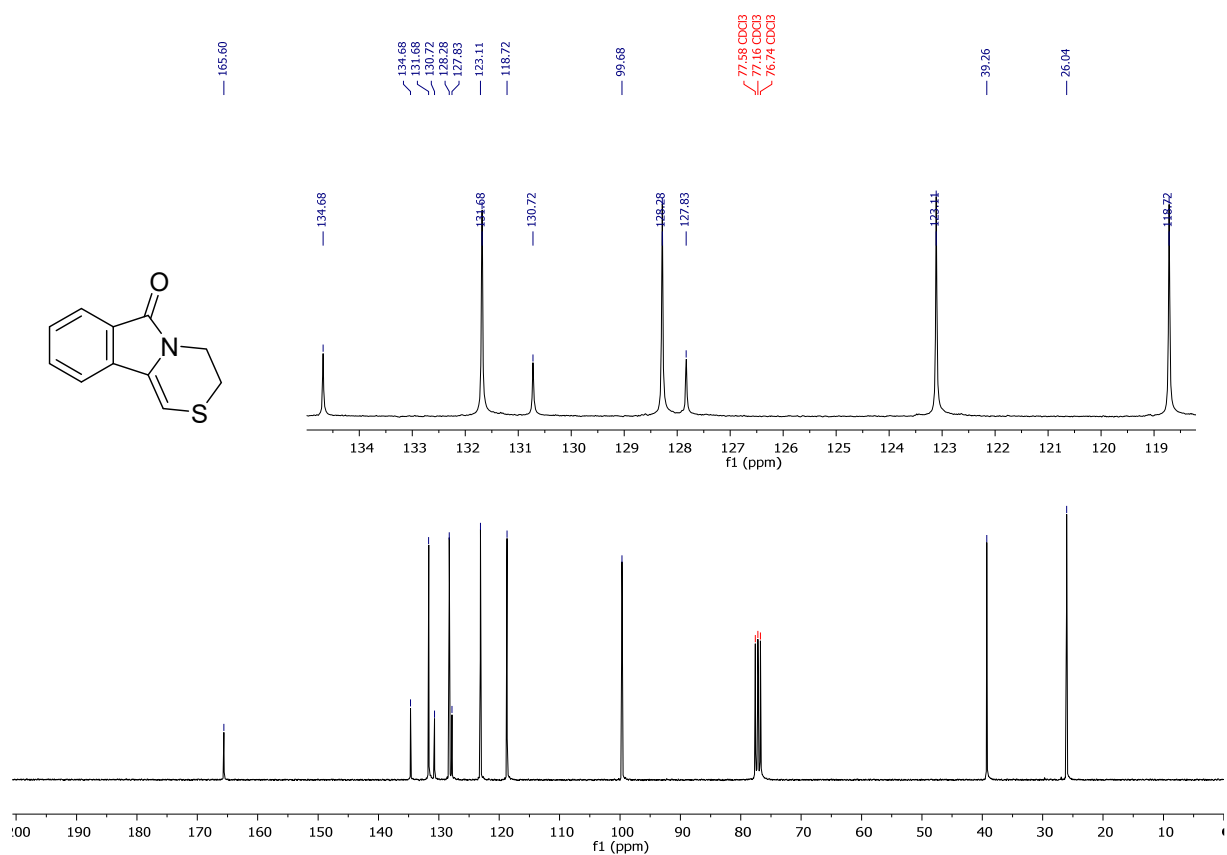

<sup>13</sup>C NMR spectrum of compound 5a

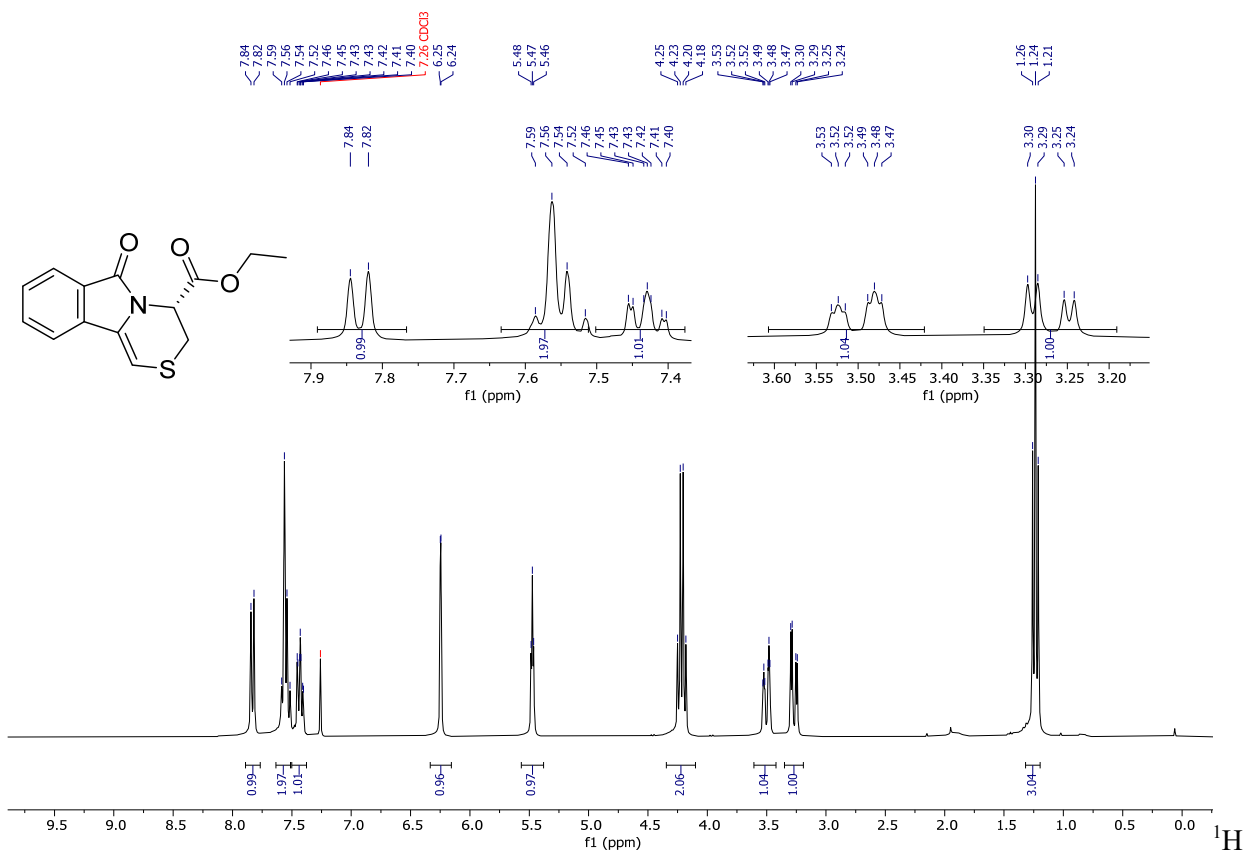

NMR spectrum of compound 5b

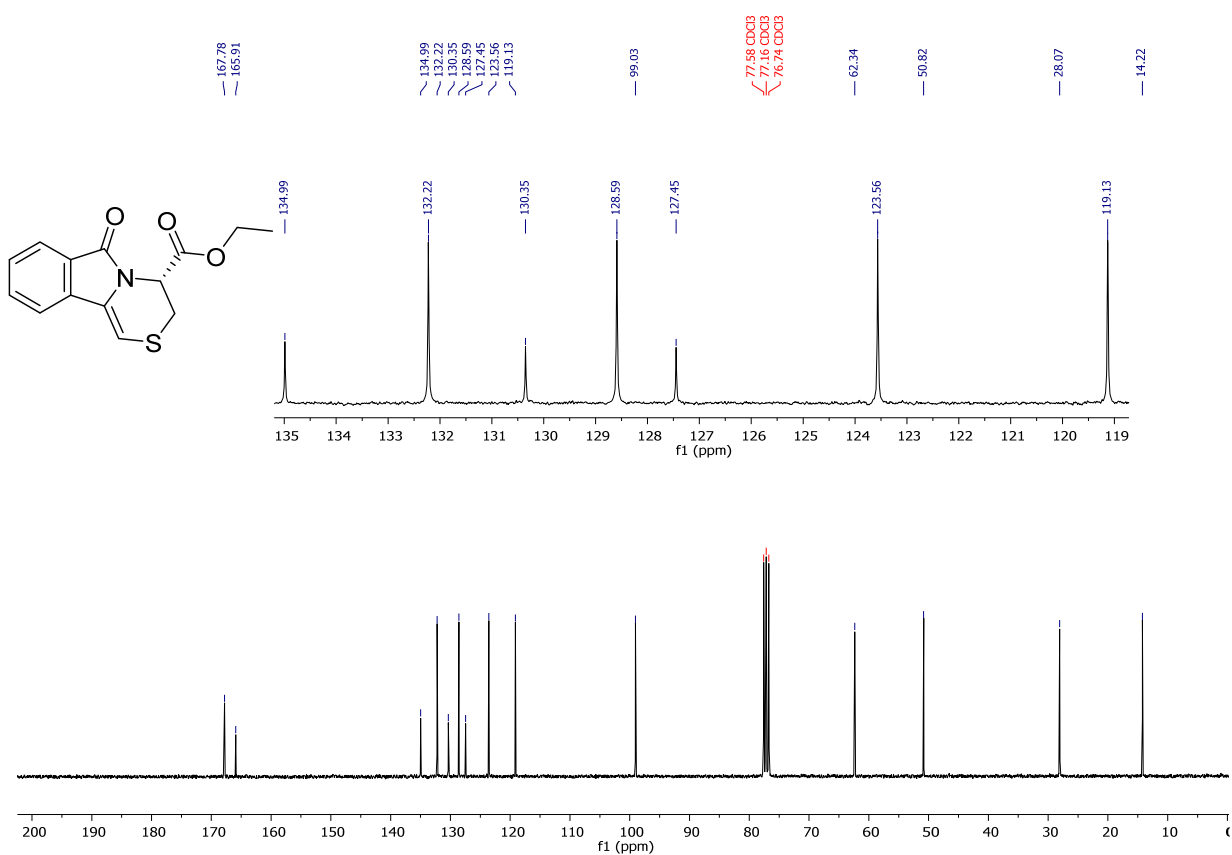

<sup>13</sup>C NMR spectrum of compound 5b

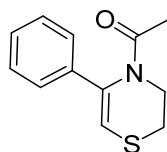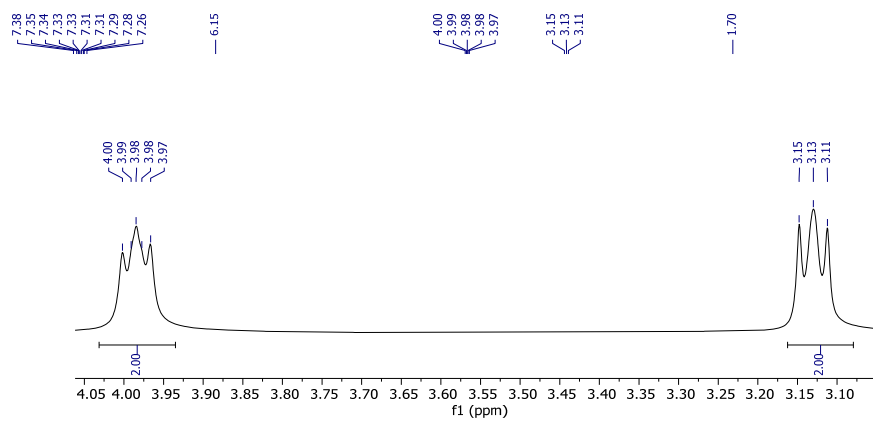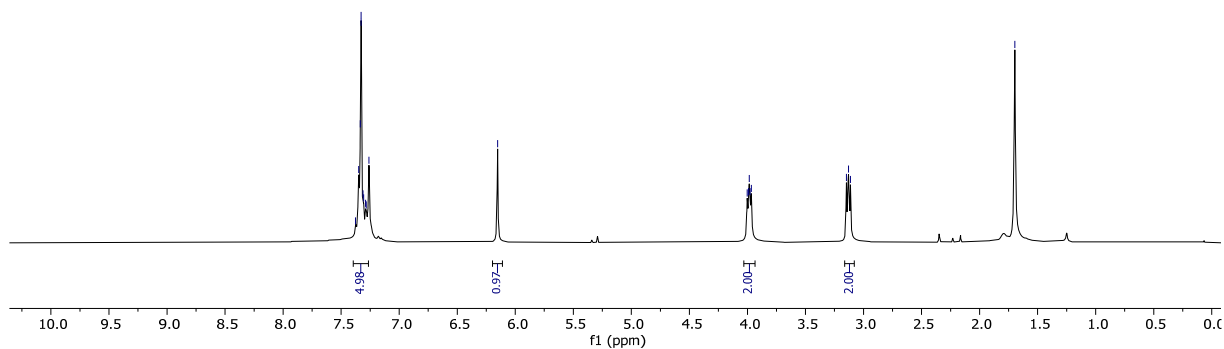

$^1\text{H}$   $^1\text{H}$  NMR spectrum of compound **5c**

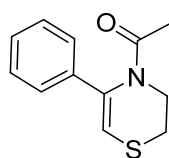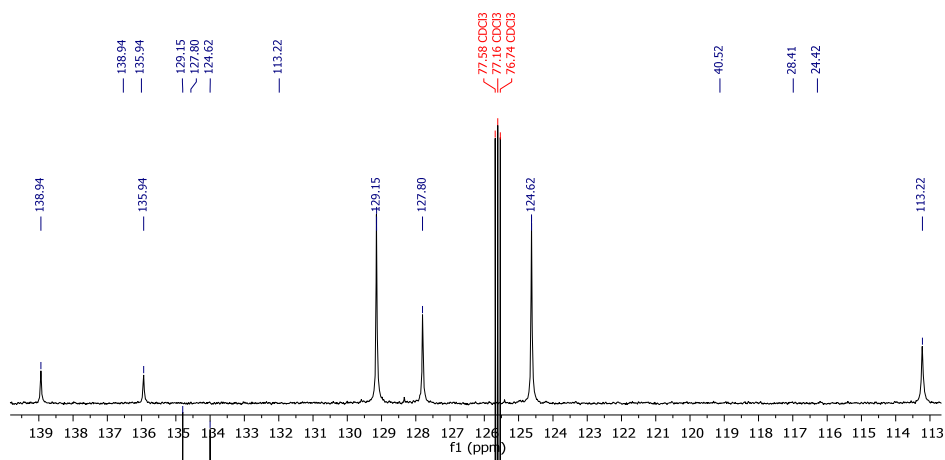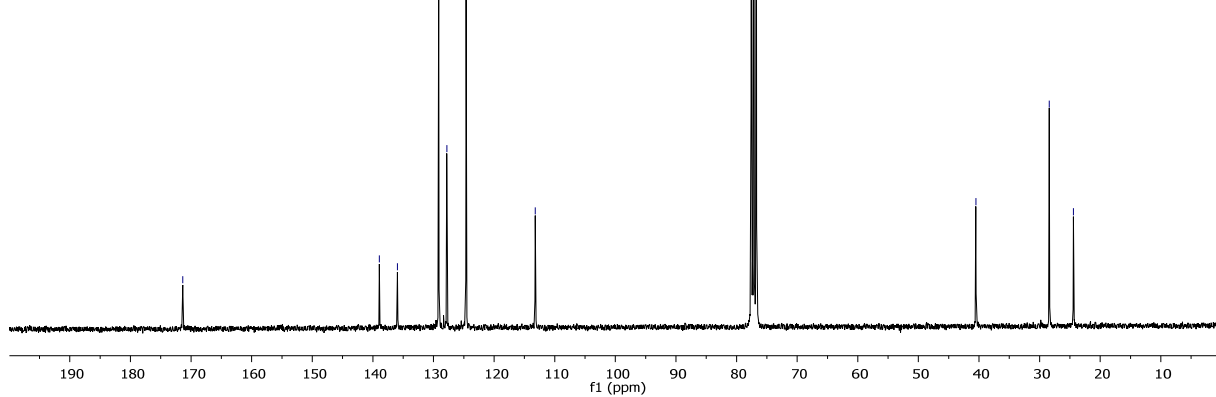

$^{13}\text{C}$  NMR spectrum of compound **5c**

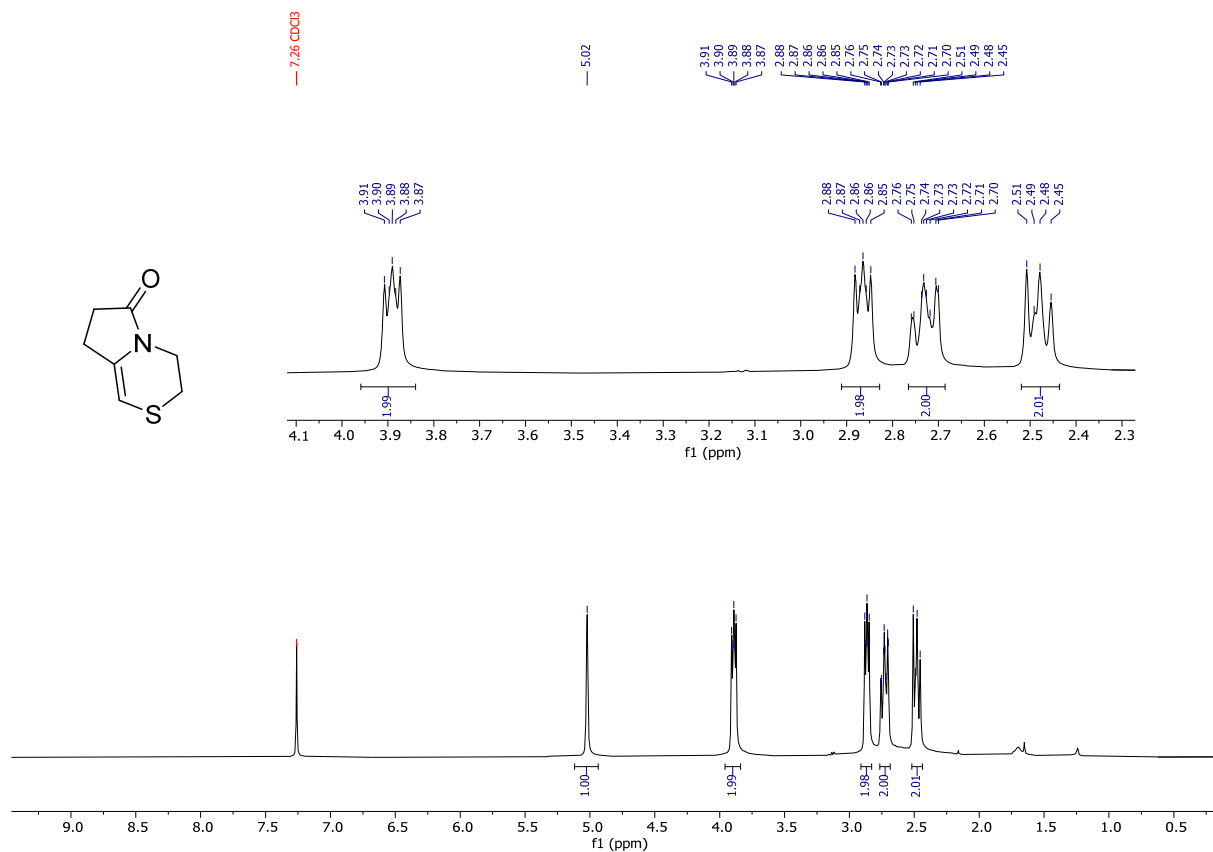

$^1\text{H}$   $^1\text{H}$  NMR spectrum of compound **9**

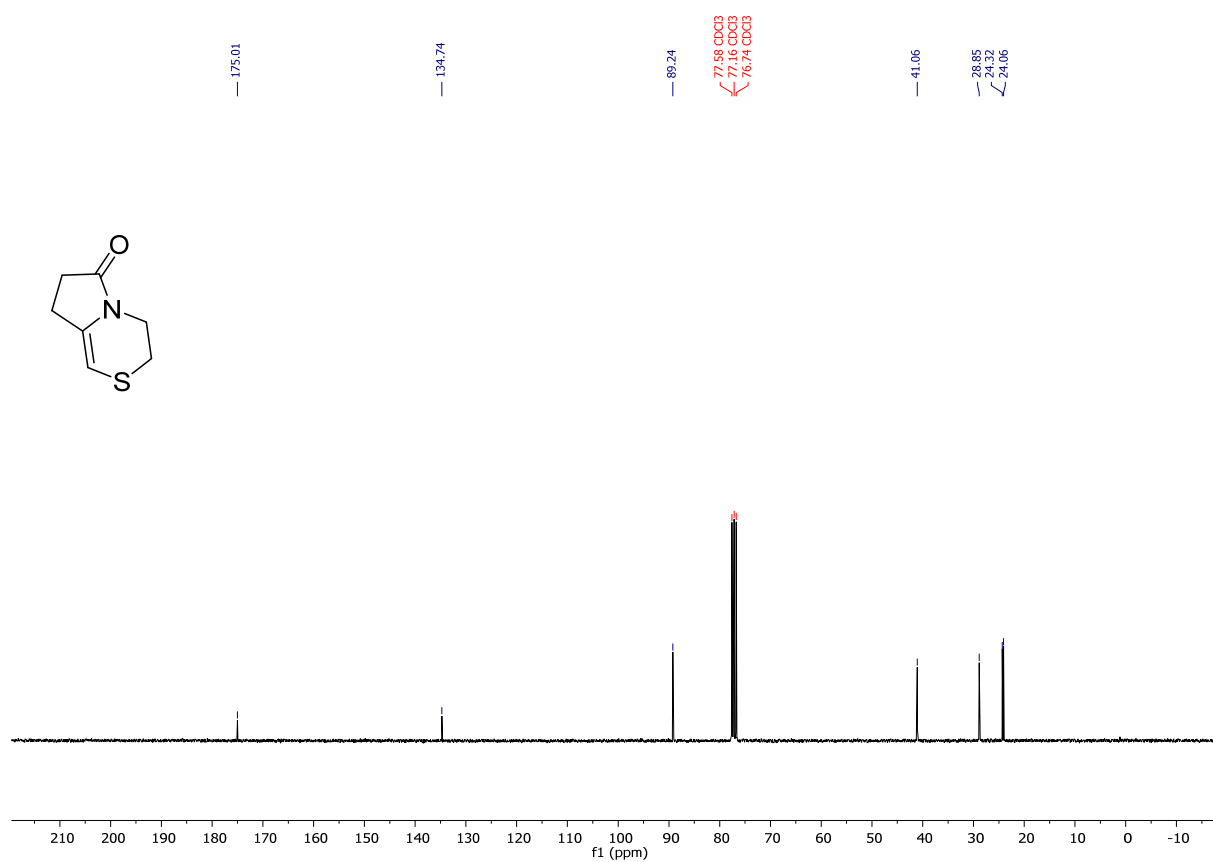

$^{13}\text{C}$  NMR spectrum of compound **9**

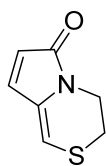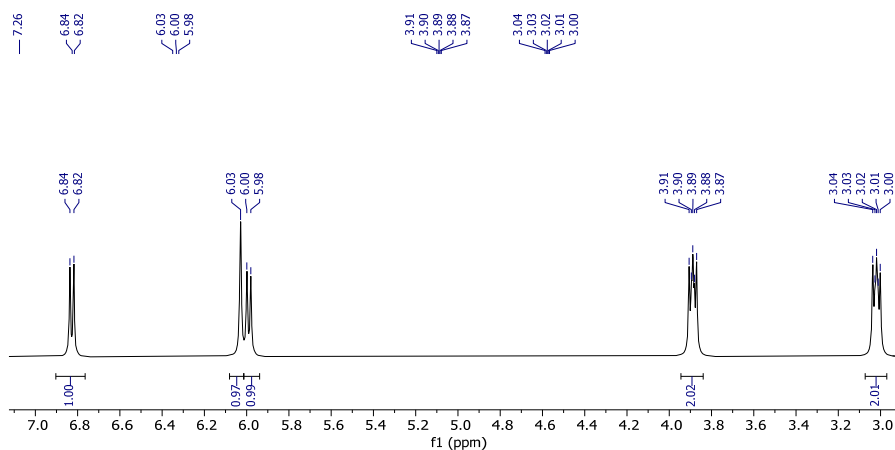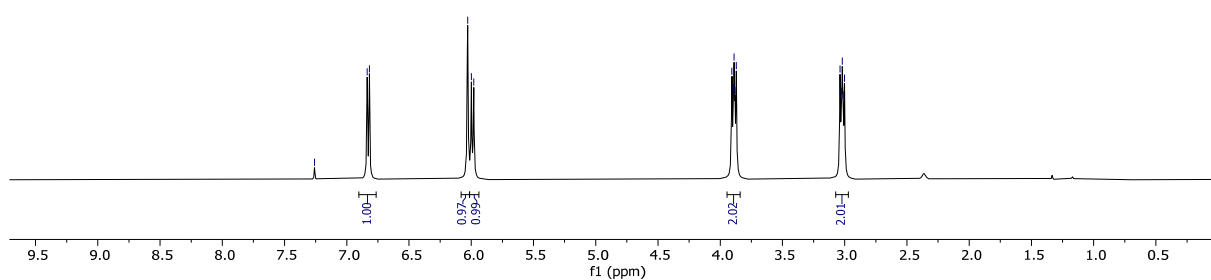

$^1\text{H}$   $^1\text{H}$  NMR spectrum of compound **10**

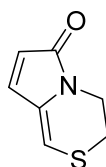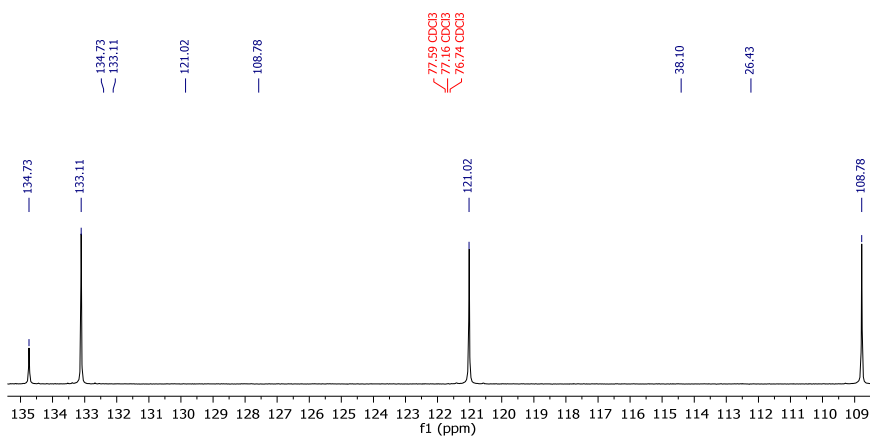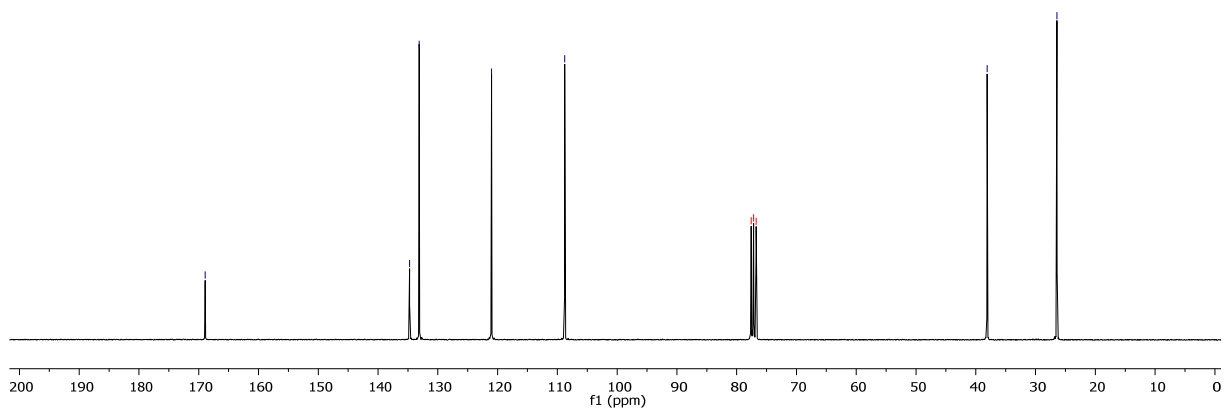

$^{13}\text{C}$  NMR spectrum of compound **10**

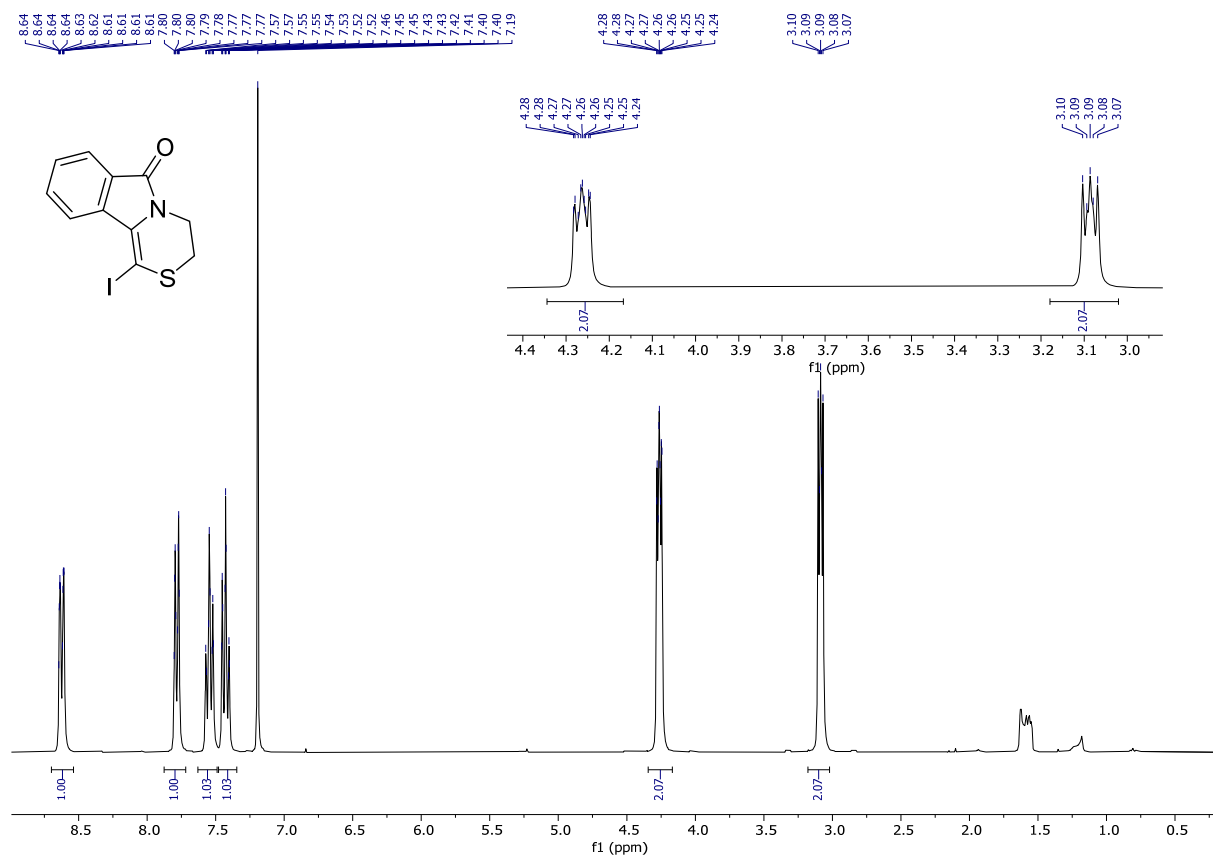

**<sup>1</sup>H NMR spectrum of compound 7aA**

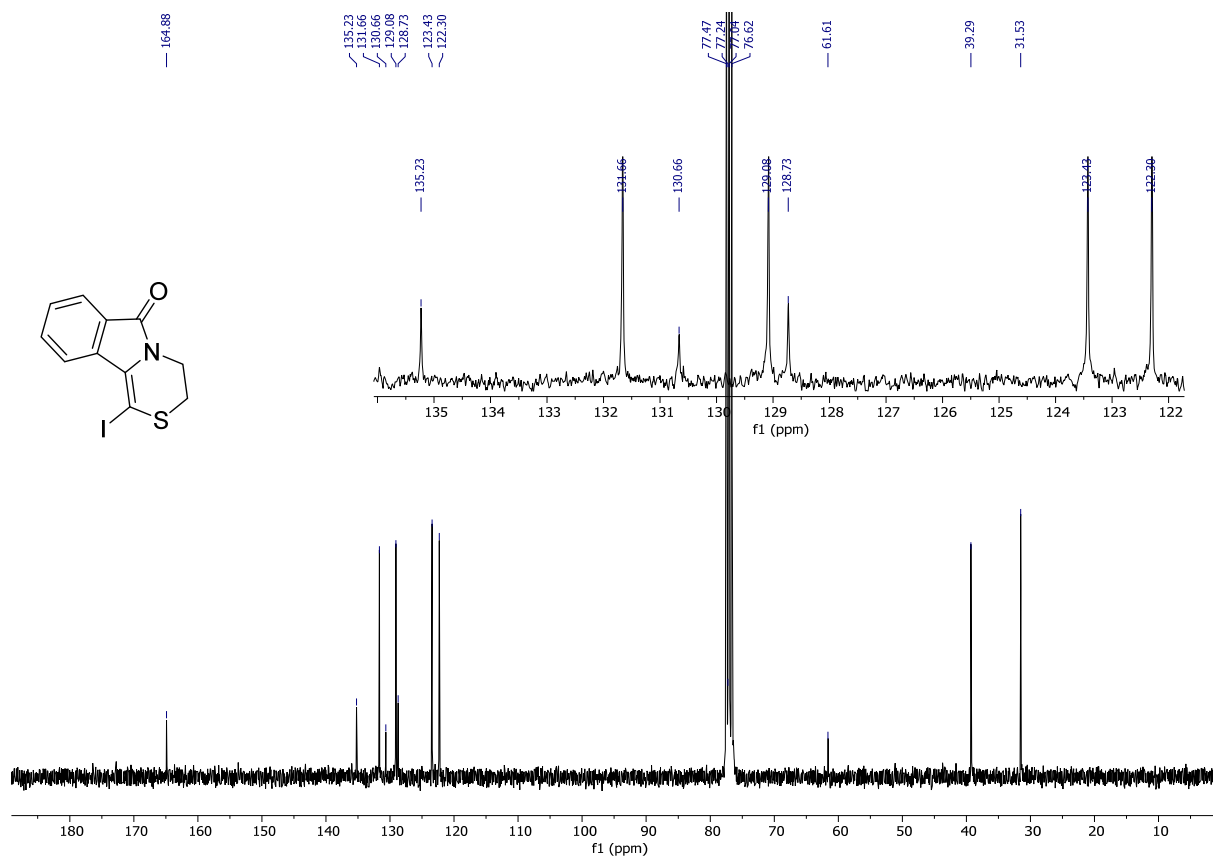

**<sup>13</sup>C NMR spectrum of compound 7aA**

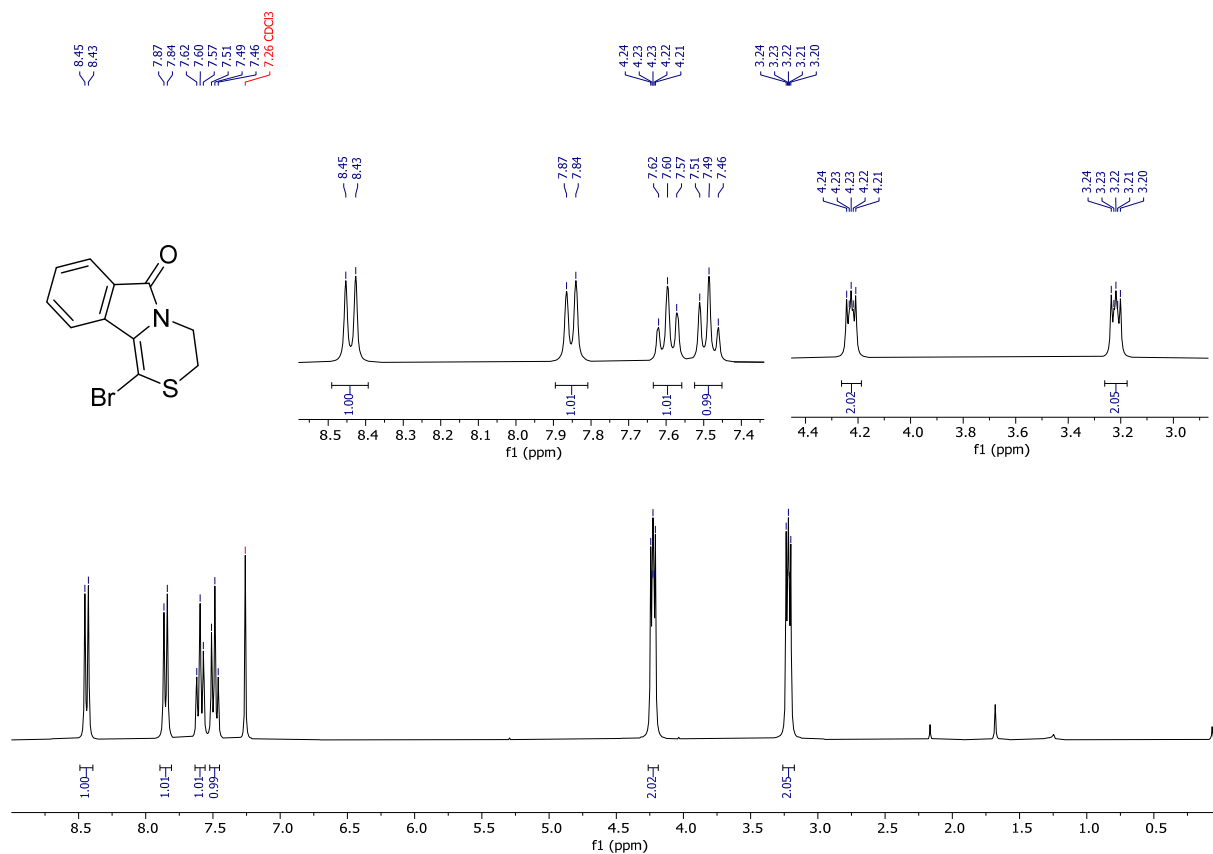

<sup>1</sup>H NMR spectrum of compound **7aB**

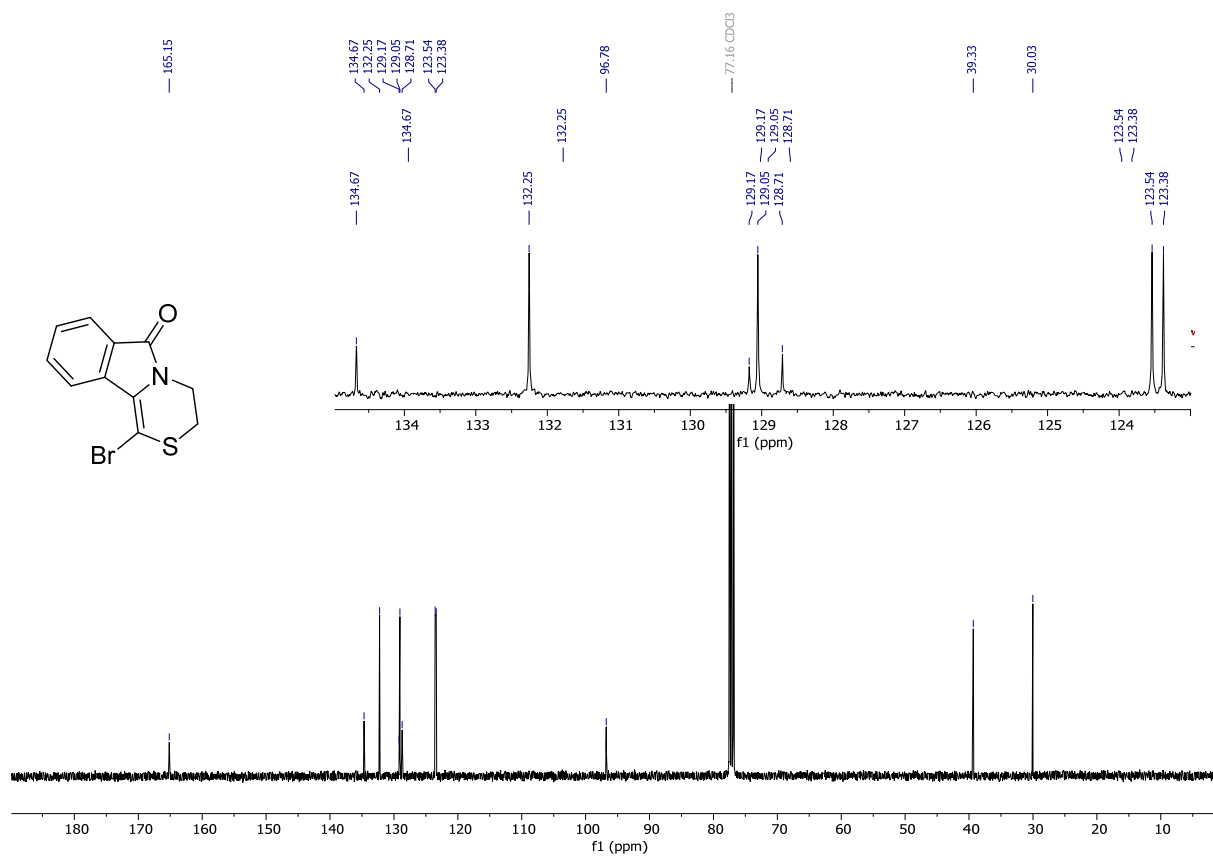

<sup>13</sup>C NMR spectrum of compound **7aB**

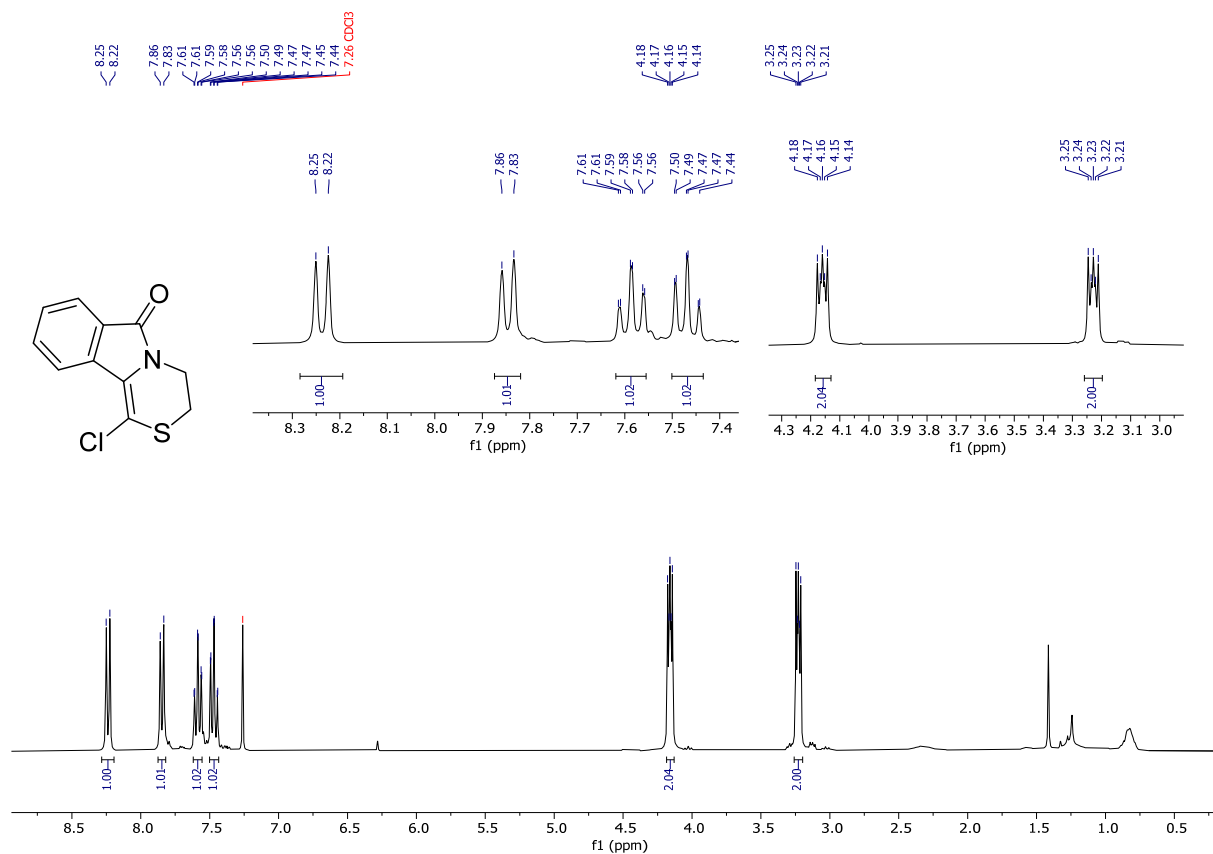

<sup>1</sup>H NMR spectrum of compound 7aC

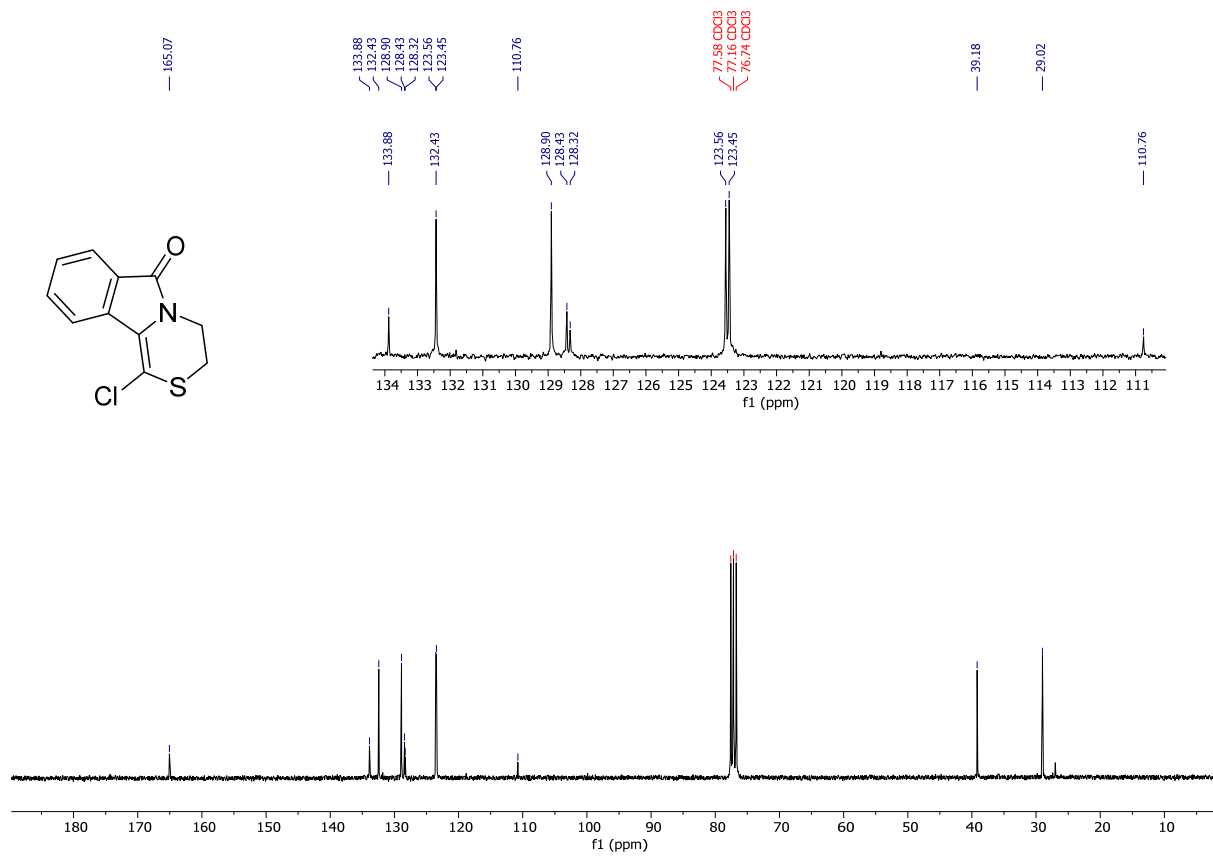

<sup>13</sup>C NMR spectrum of compound 7aC

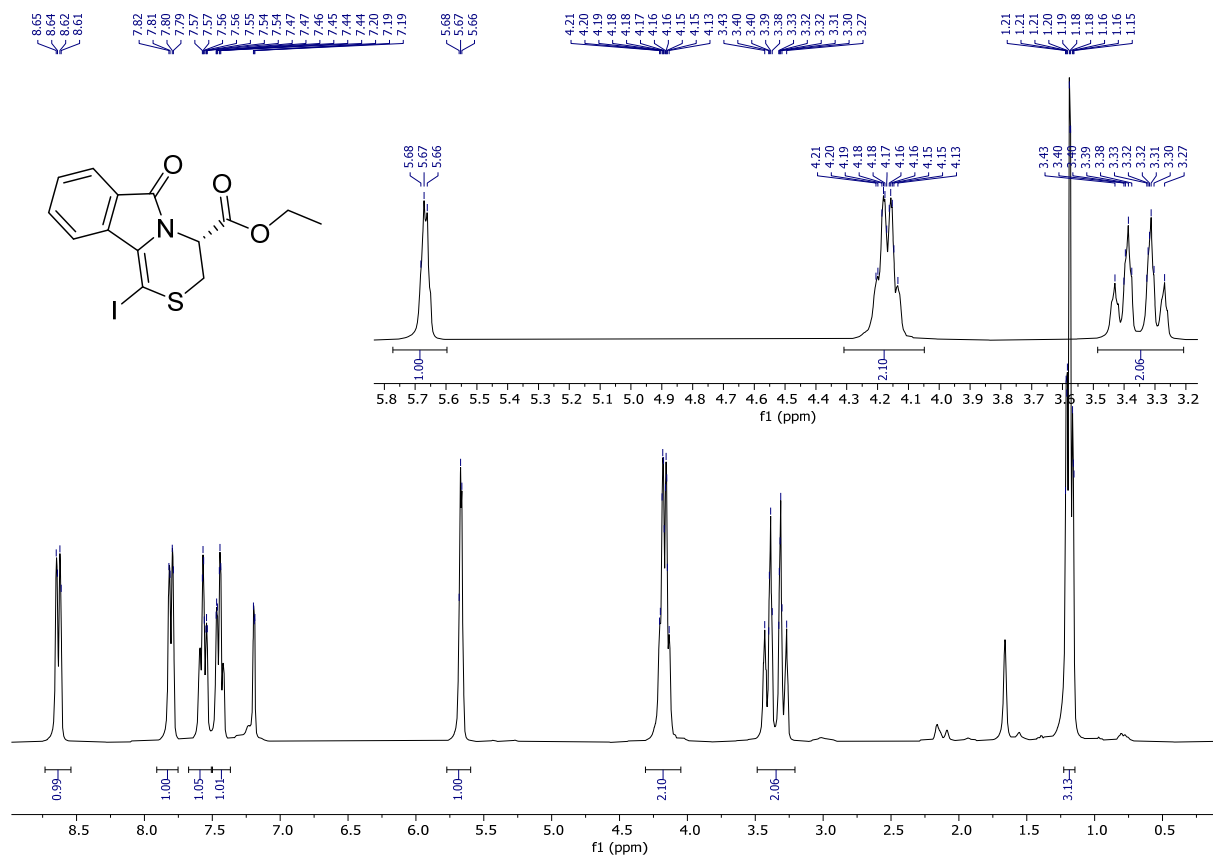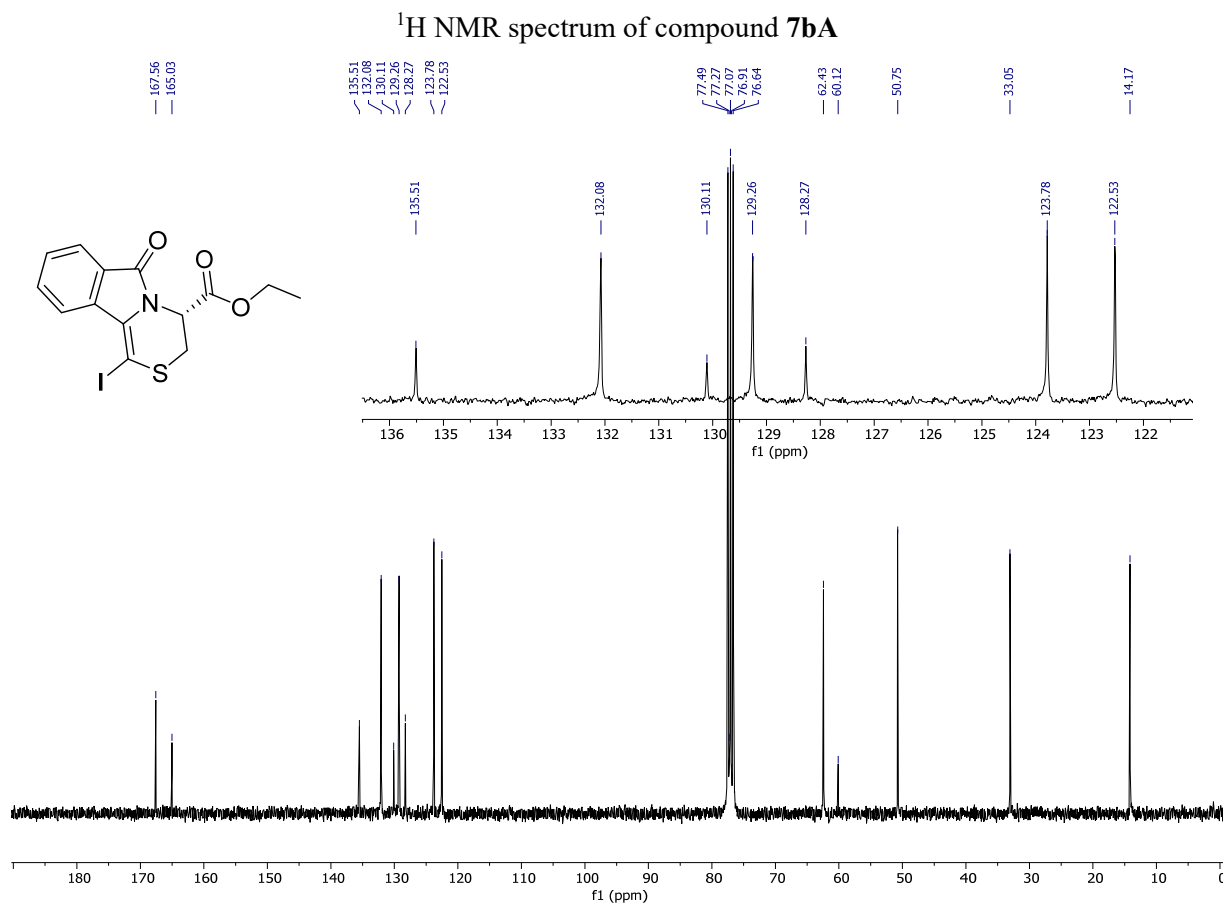

**<sup>13</sup>C NMR spectrum of compound 7bA**

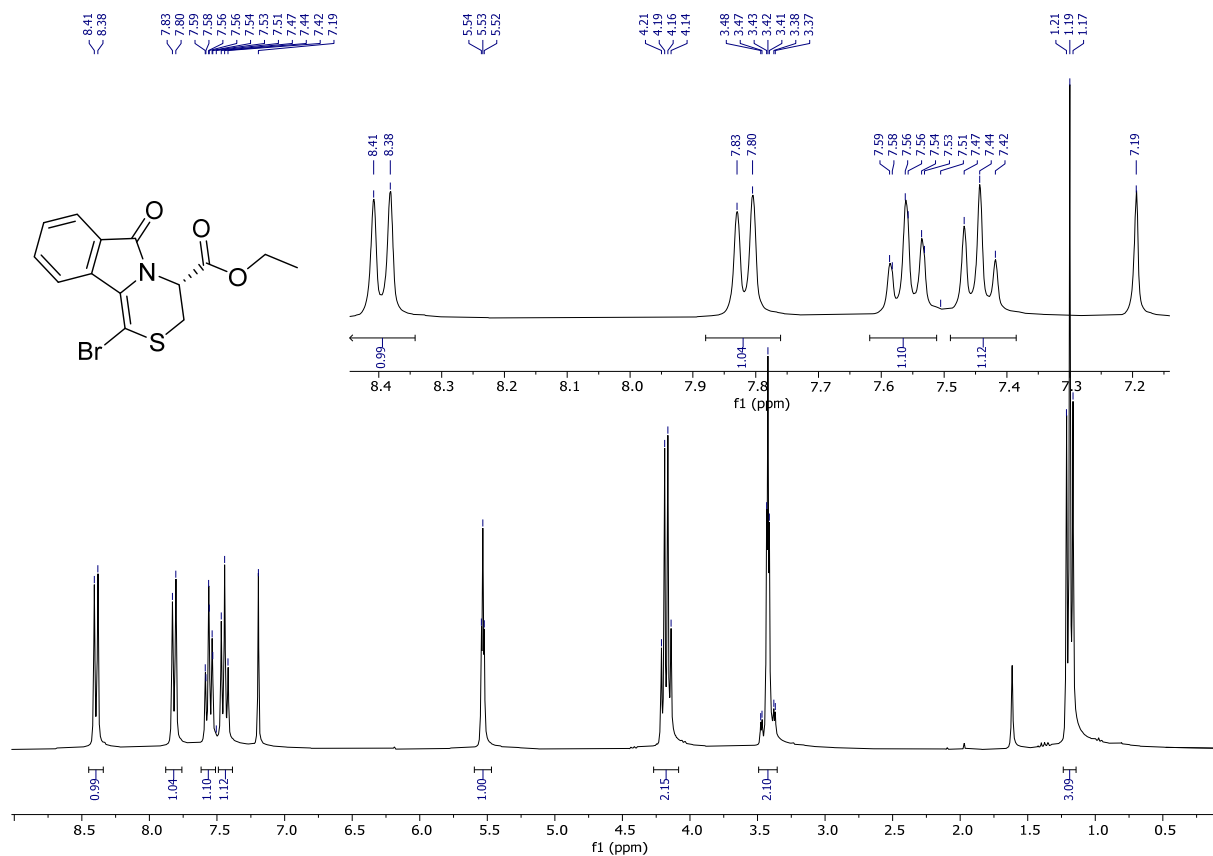

<sup>1</sup>H NMR spectrum of compound **7bB**

KA-FD-1569.11.fid

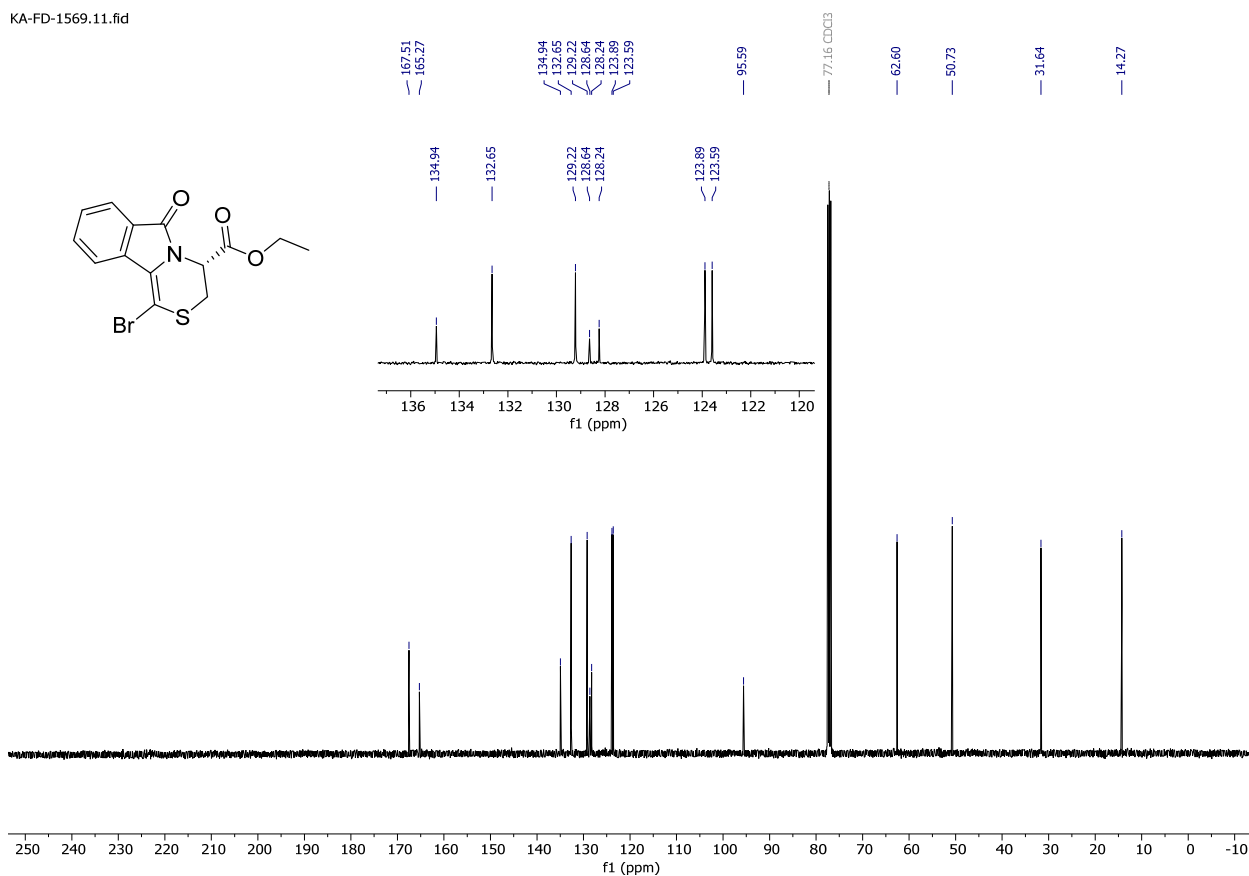

<sup>13</sup>C NMR spectrum of compound **7bB**

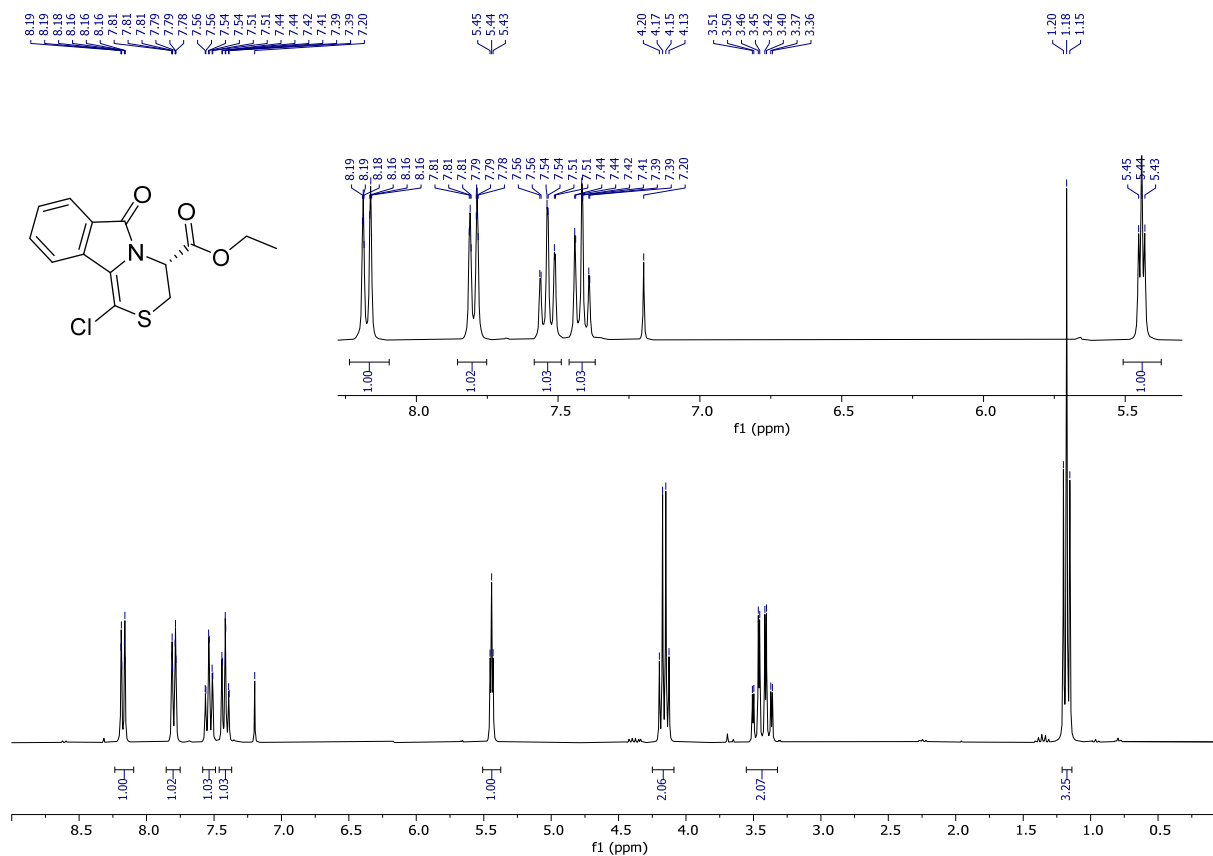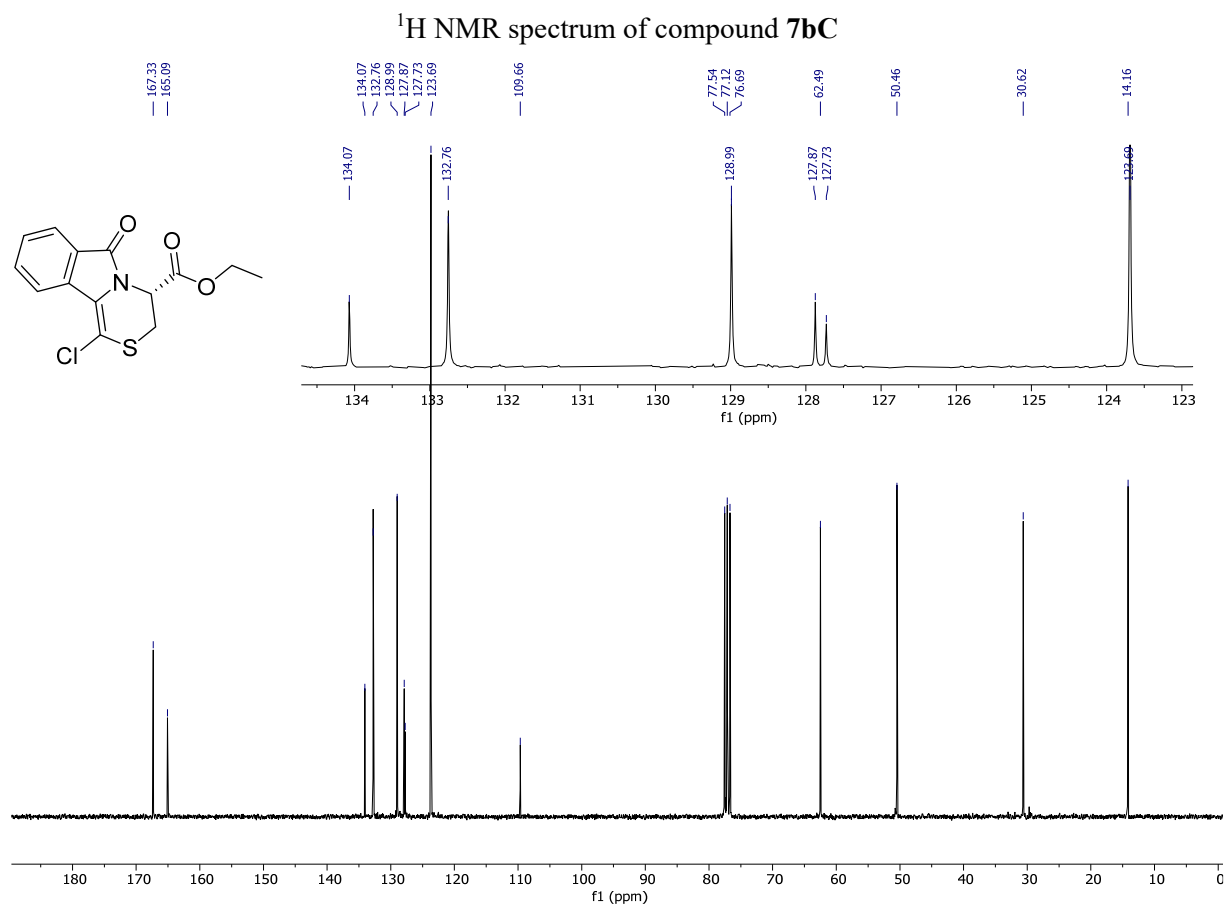

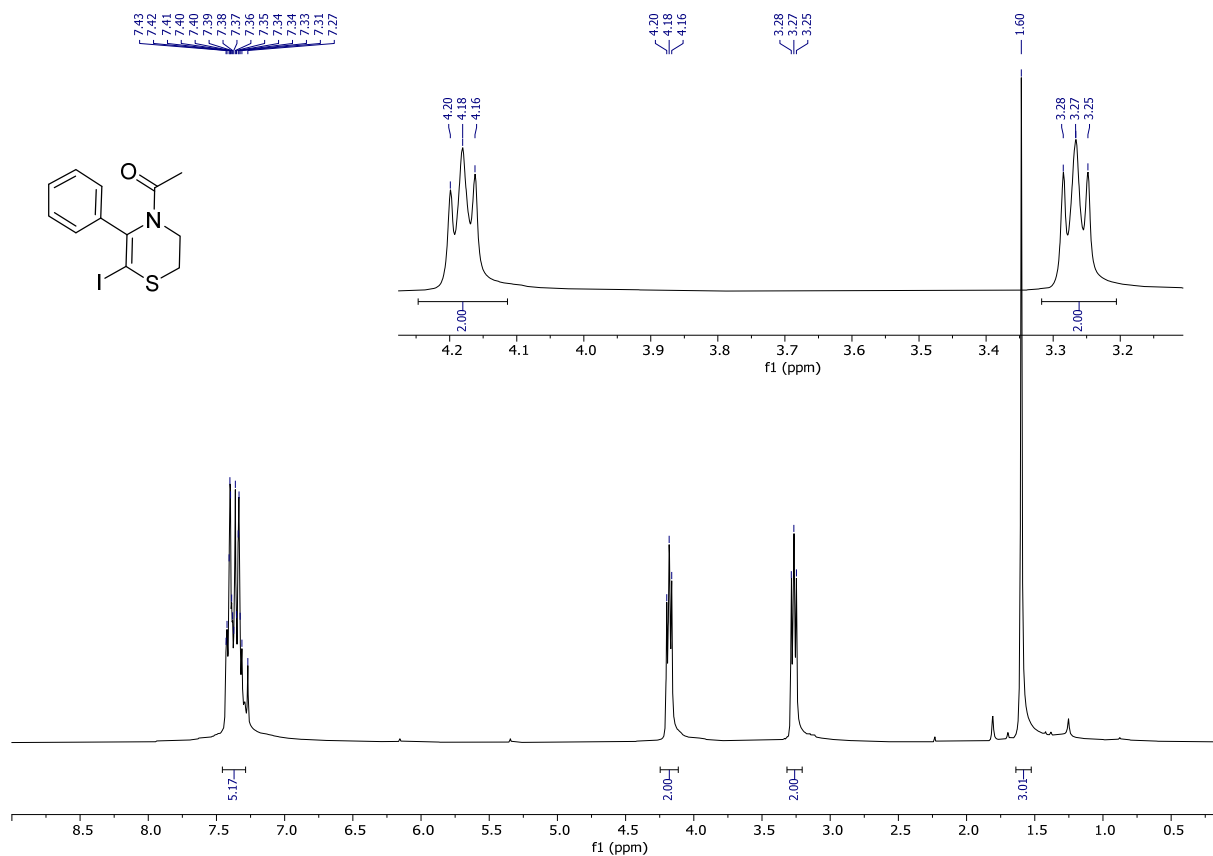

<sup>1</sup>H NMR spectrum of compound 7cA

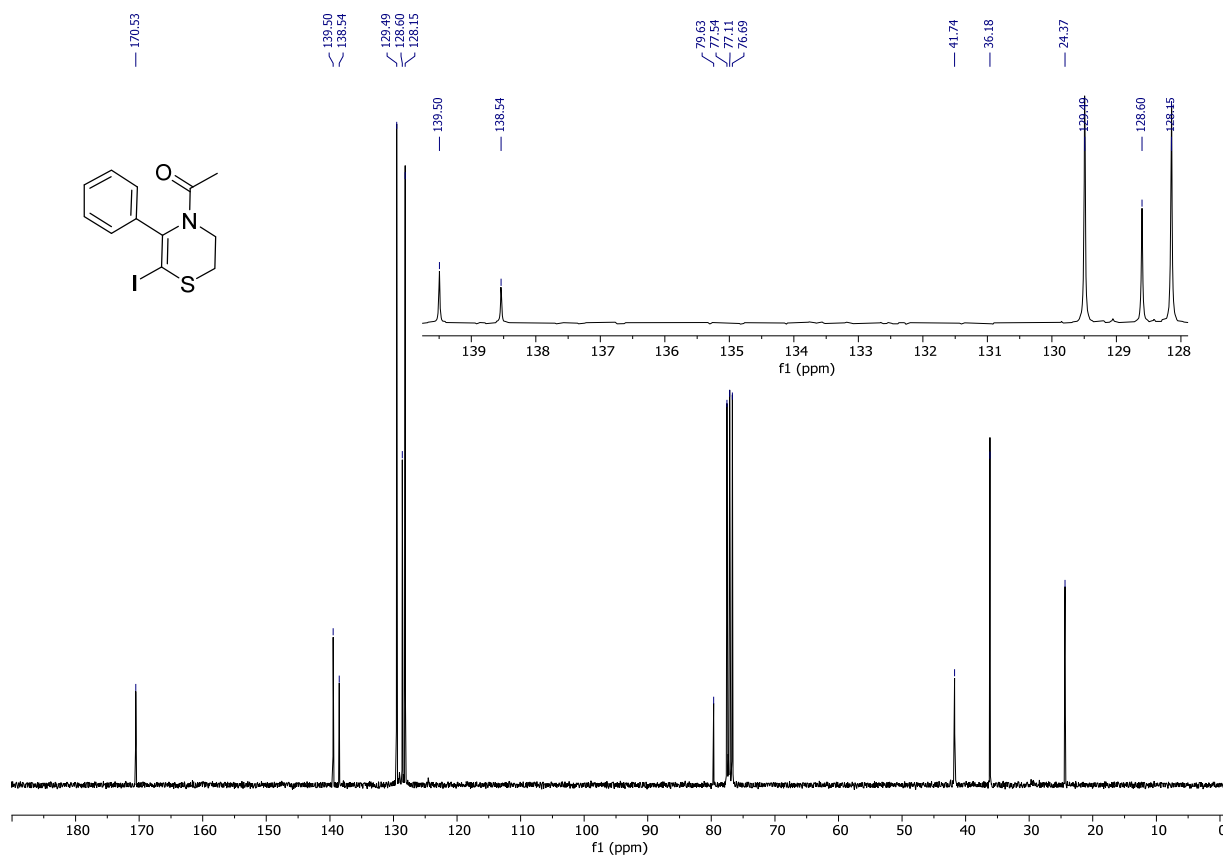

<sup>13</sup>C NMR spectrum of compound 7cA

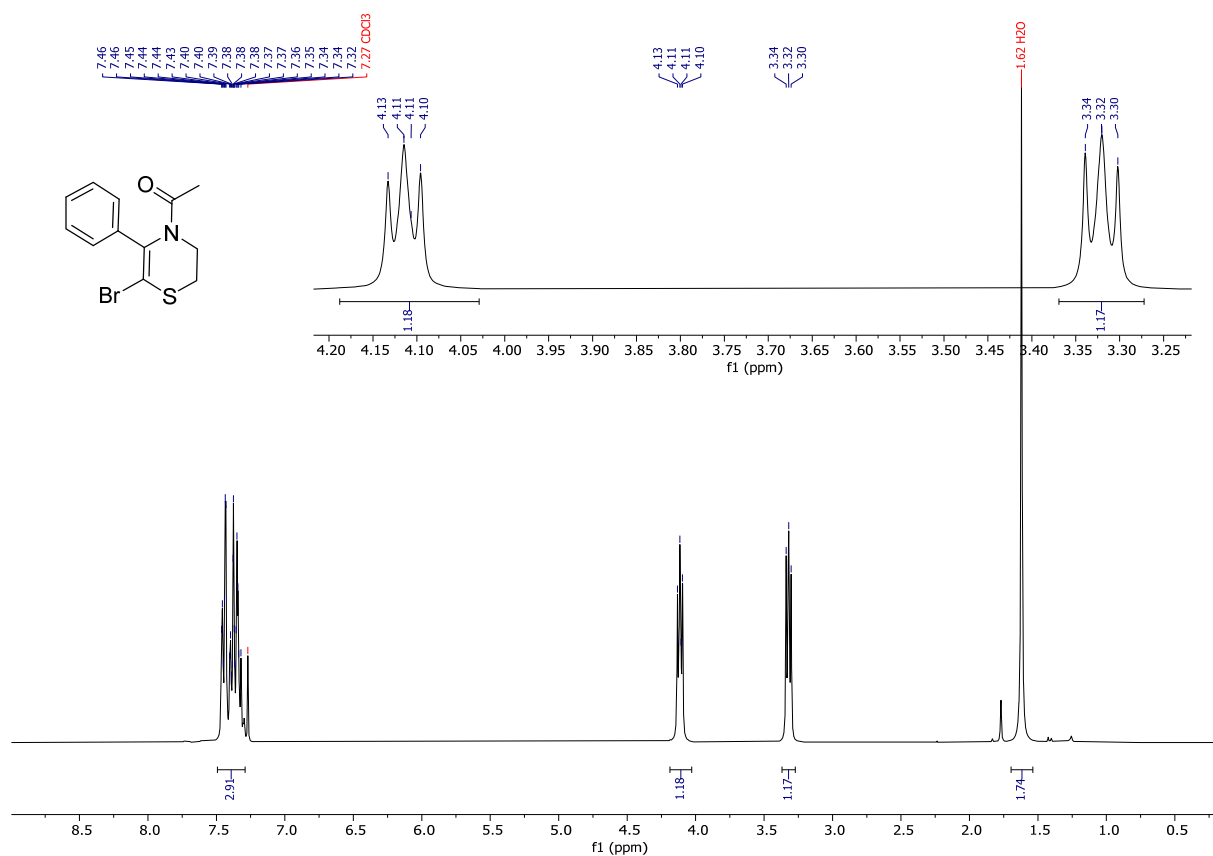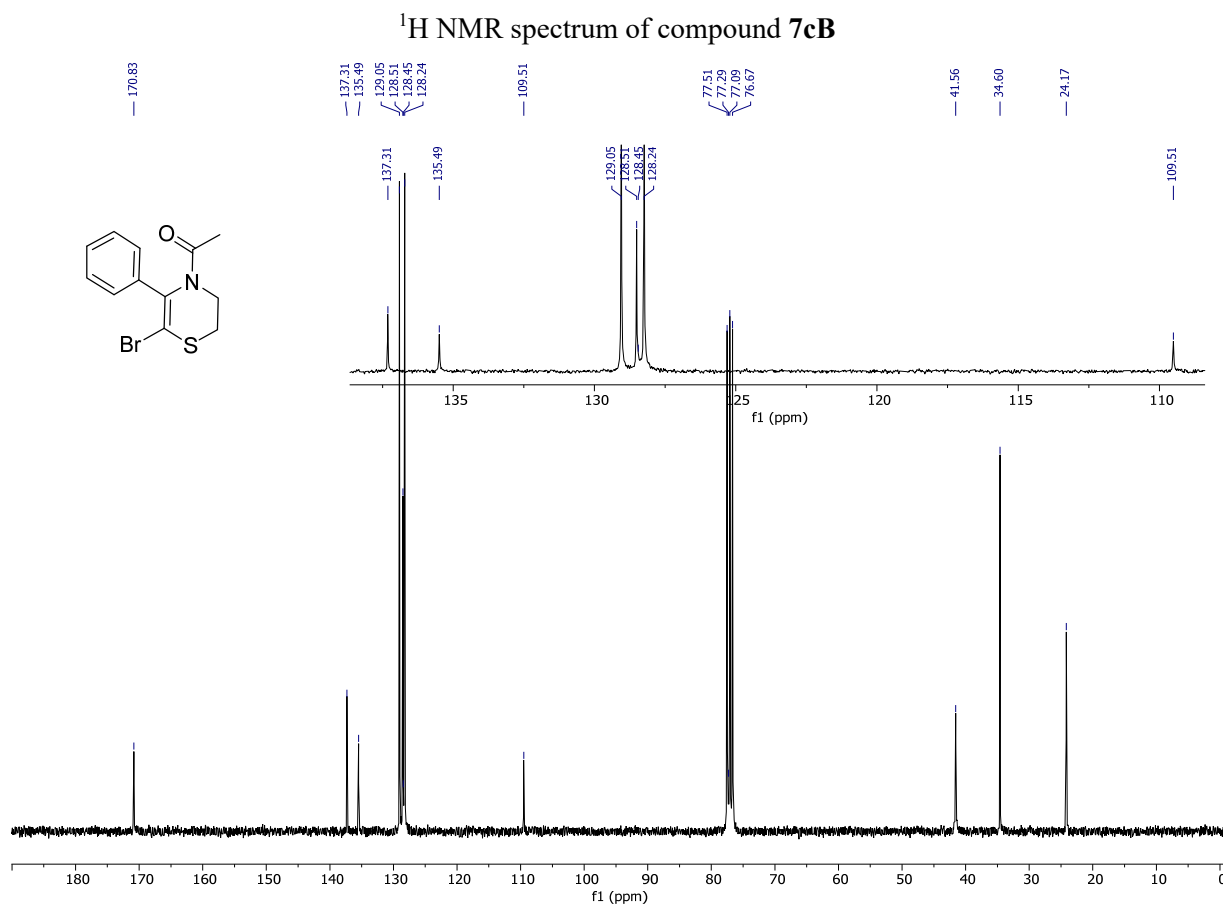

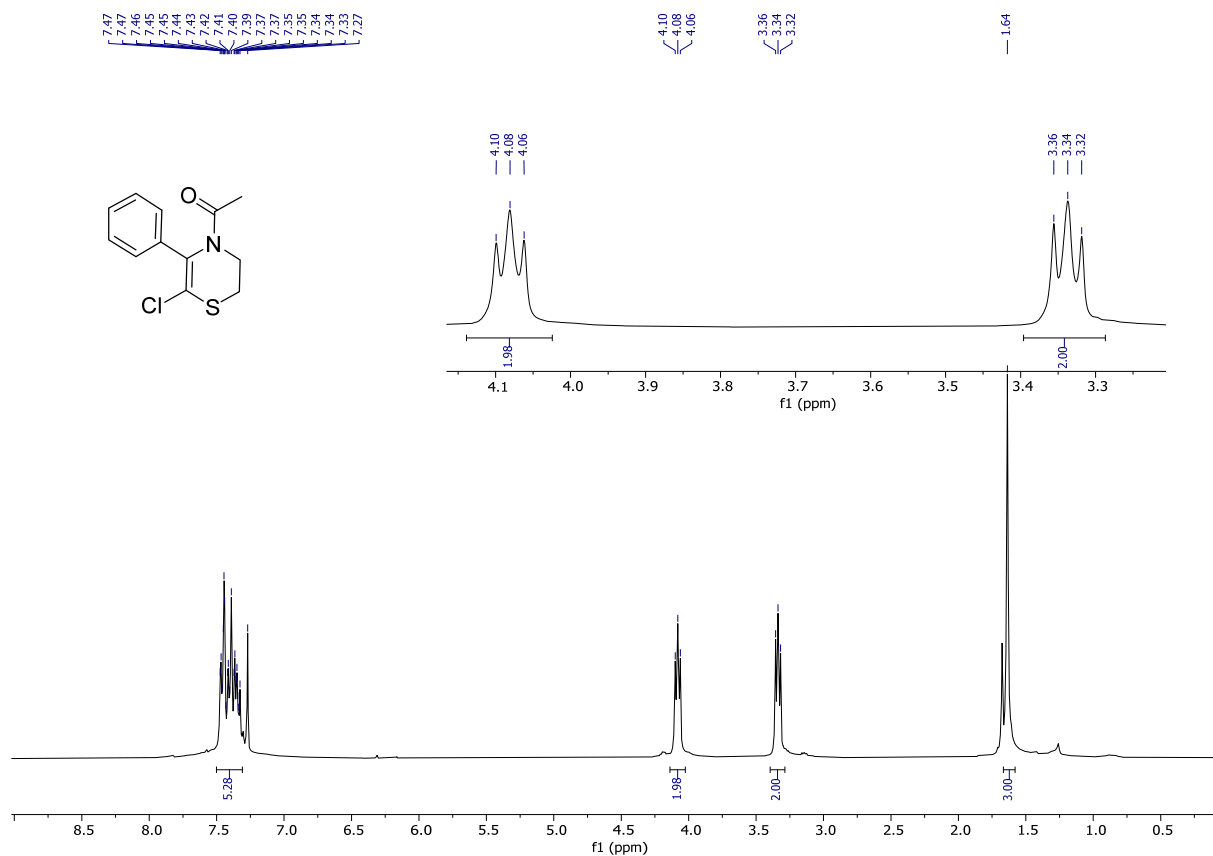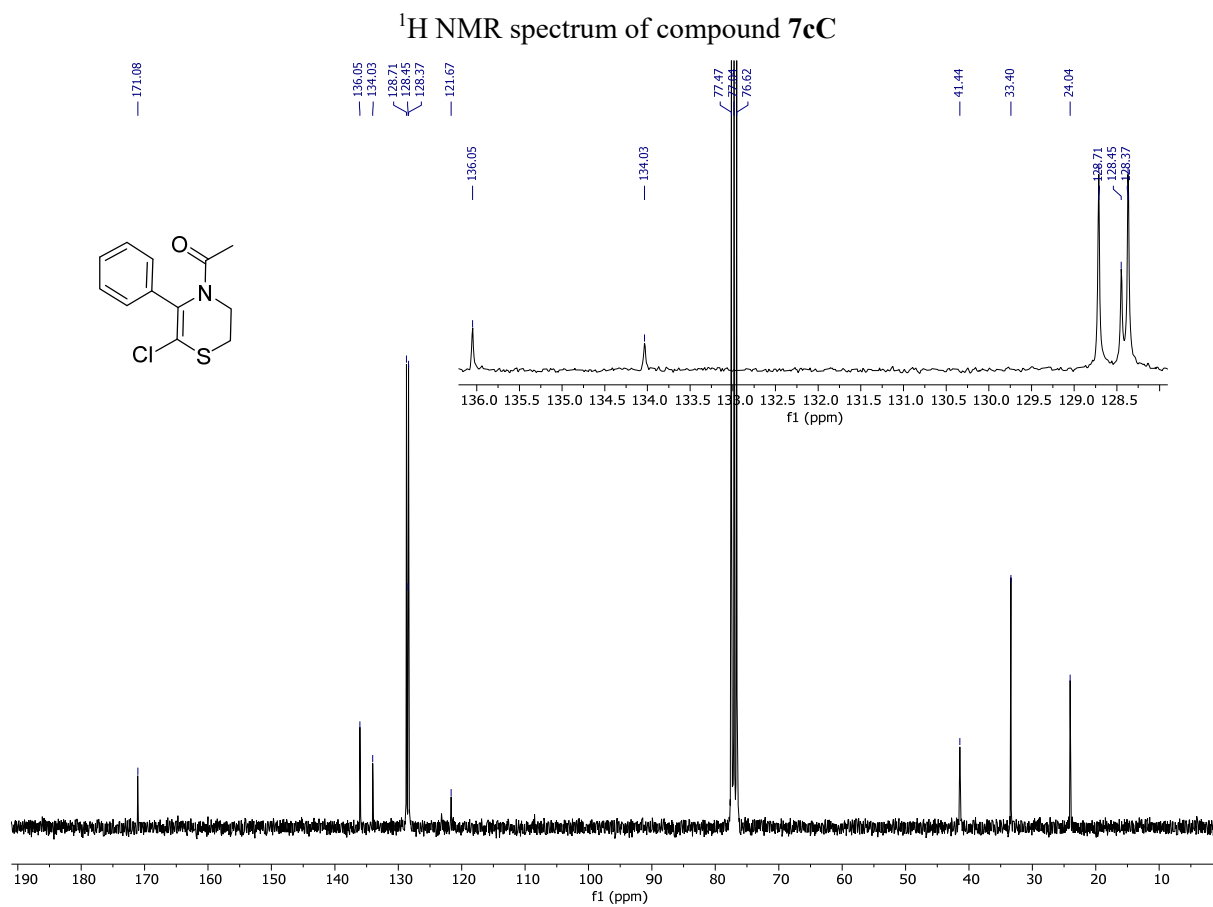

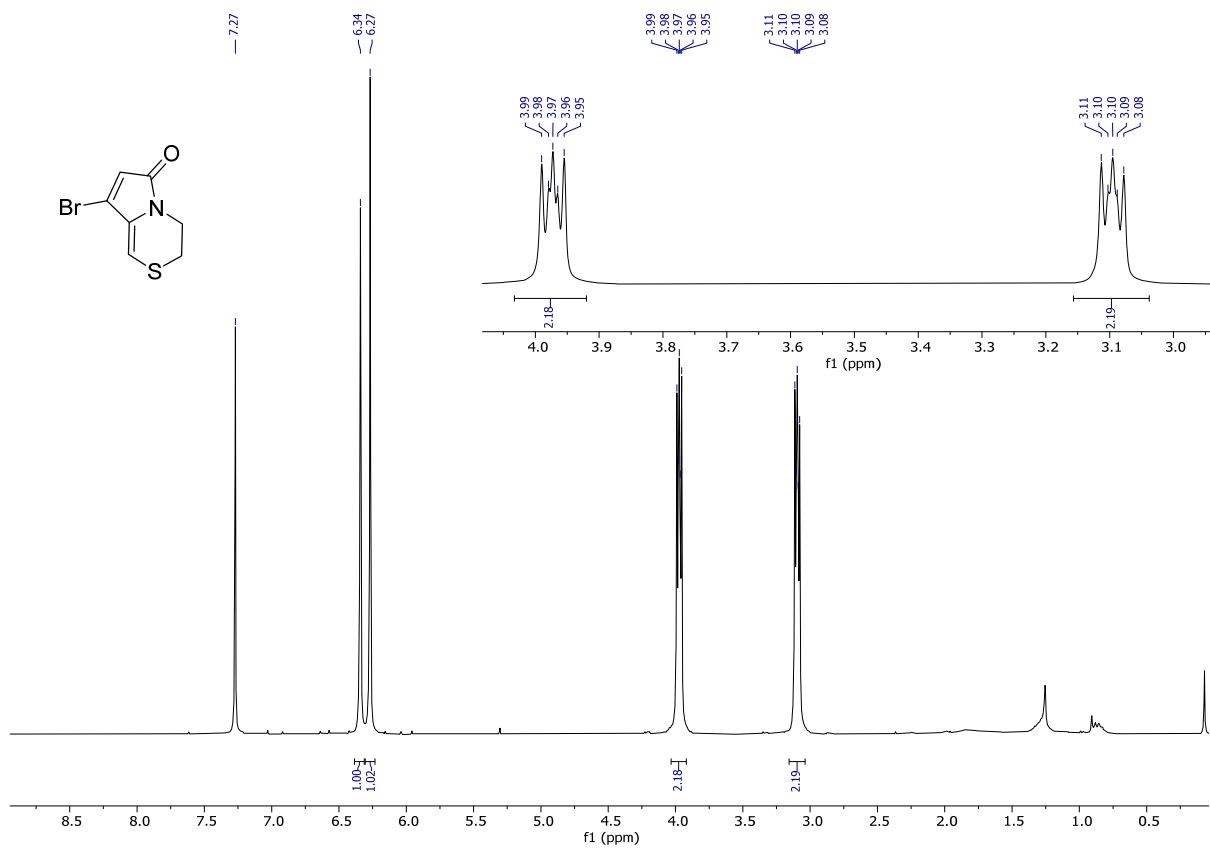

**<sup>1</sup>H NMR spectrum of compound 7dB**

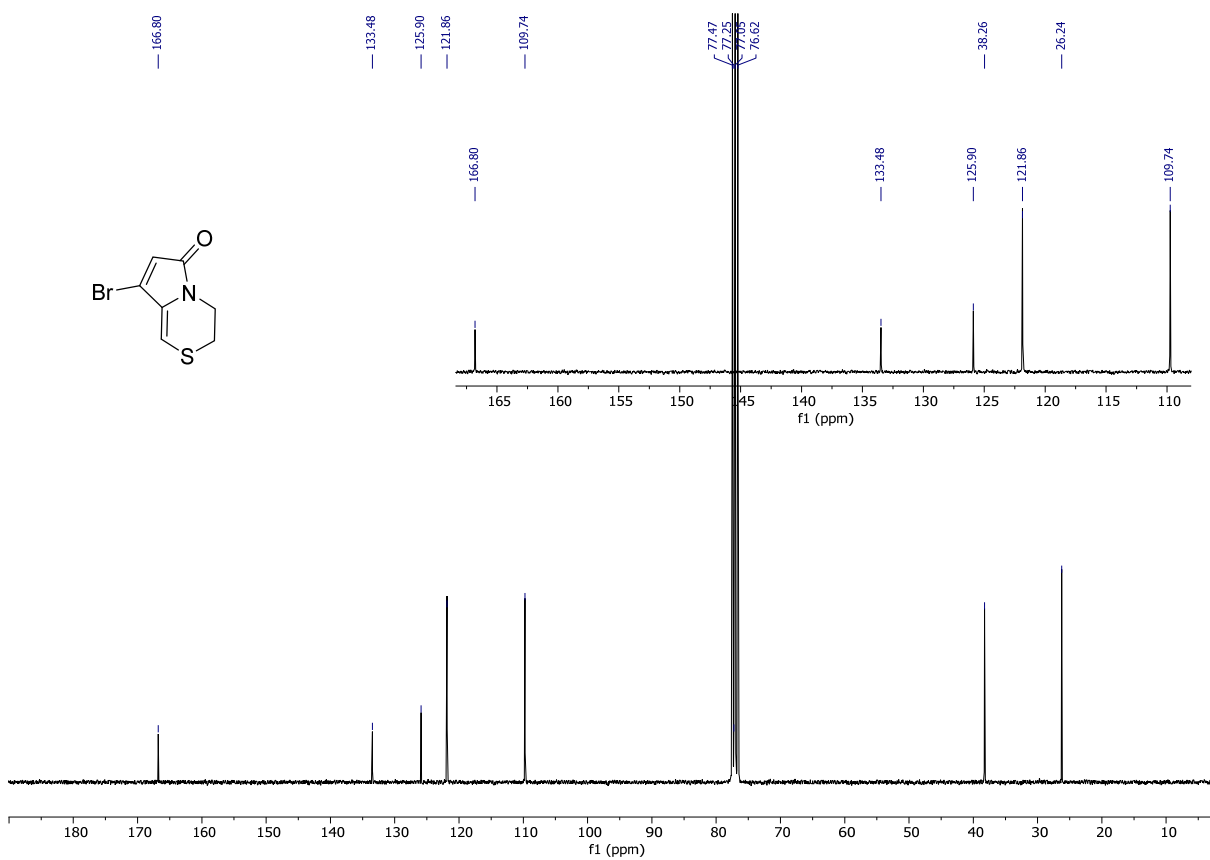

**<sup>13</sup>C NMR spectrum of compound 7dB**

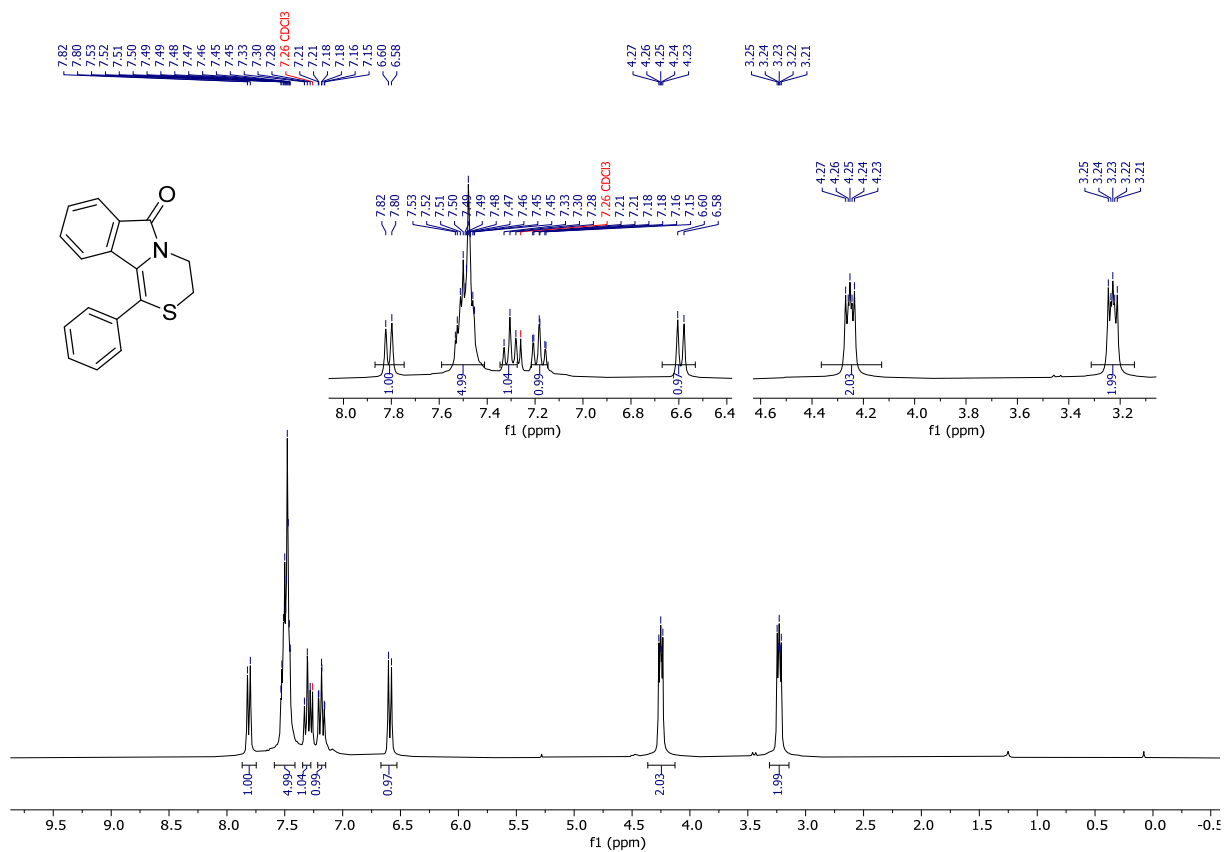

<sup>1</sup>H NMR spectrum of compound 8a

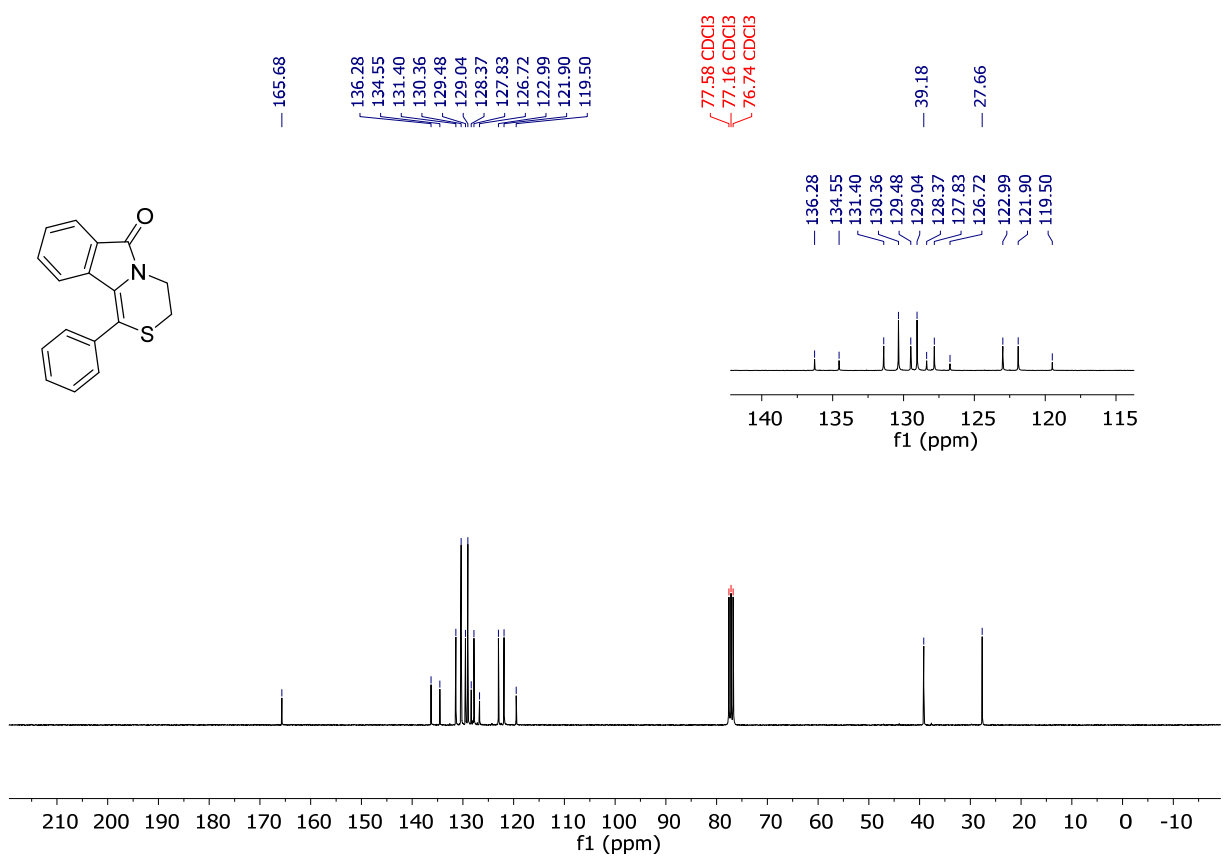

<sup>13</sup>C NMR spectrum of compound 8a

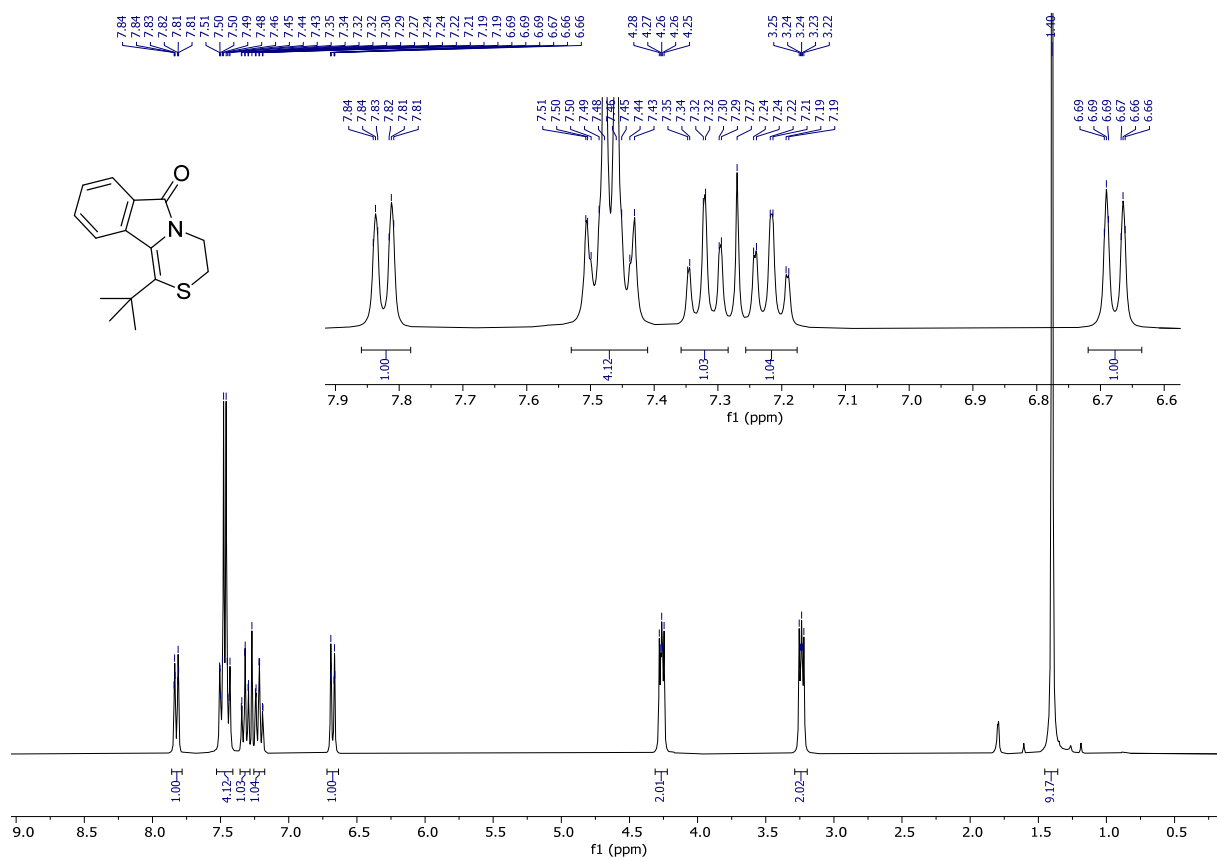

**<sup>1</sup>H NMR spectrum of compound 8b**

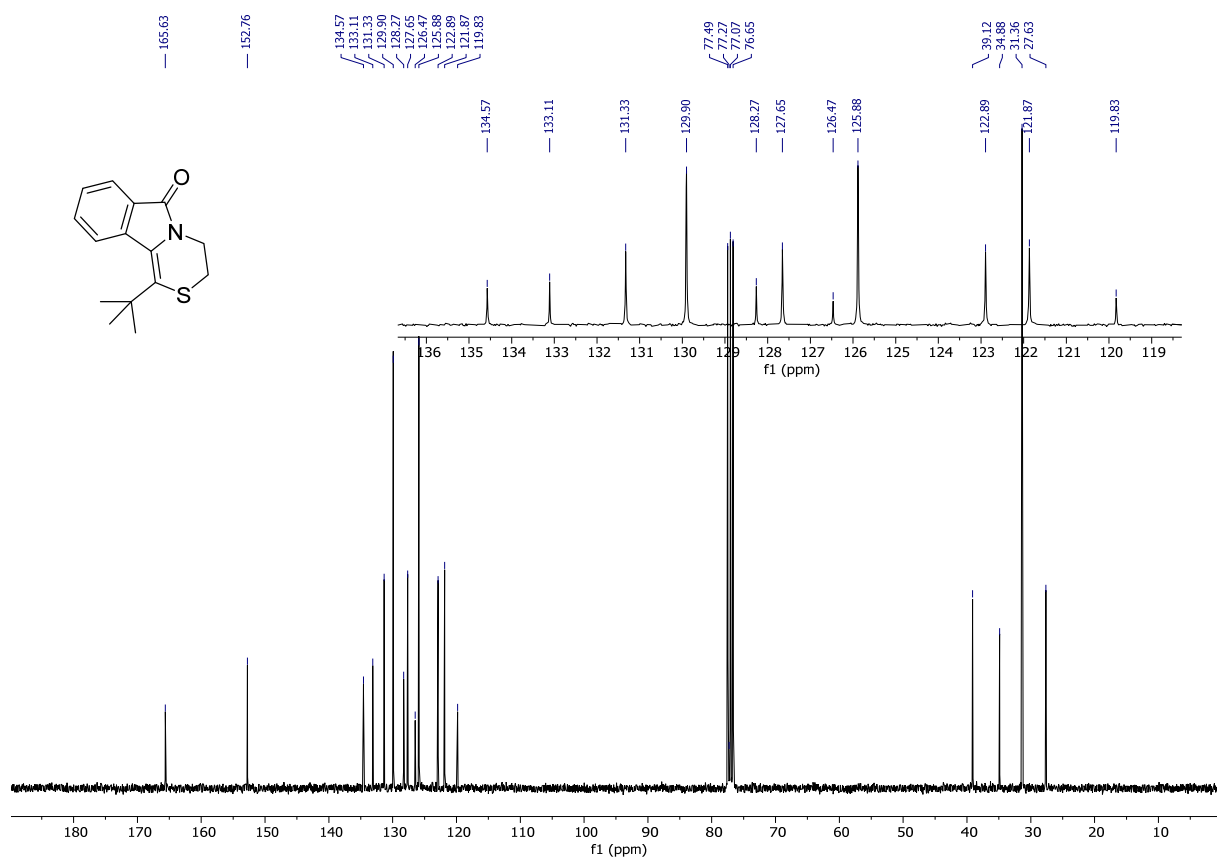

**<sup>13</sup>C NMR spectrum of compound 8b**

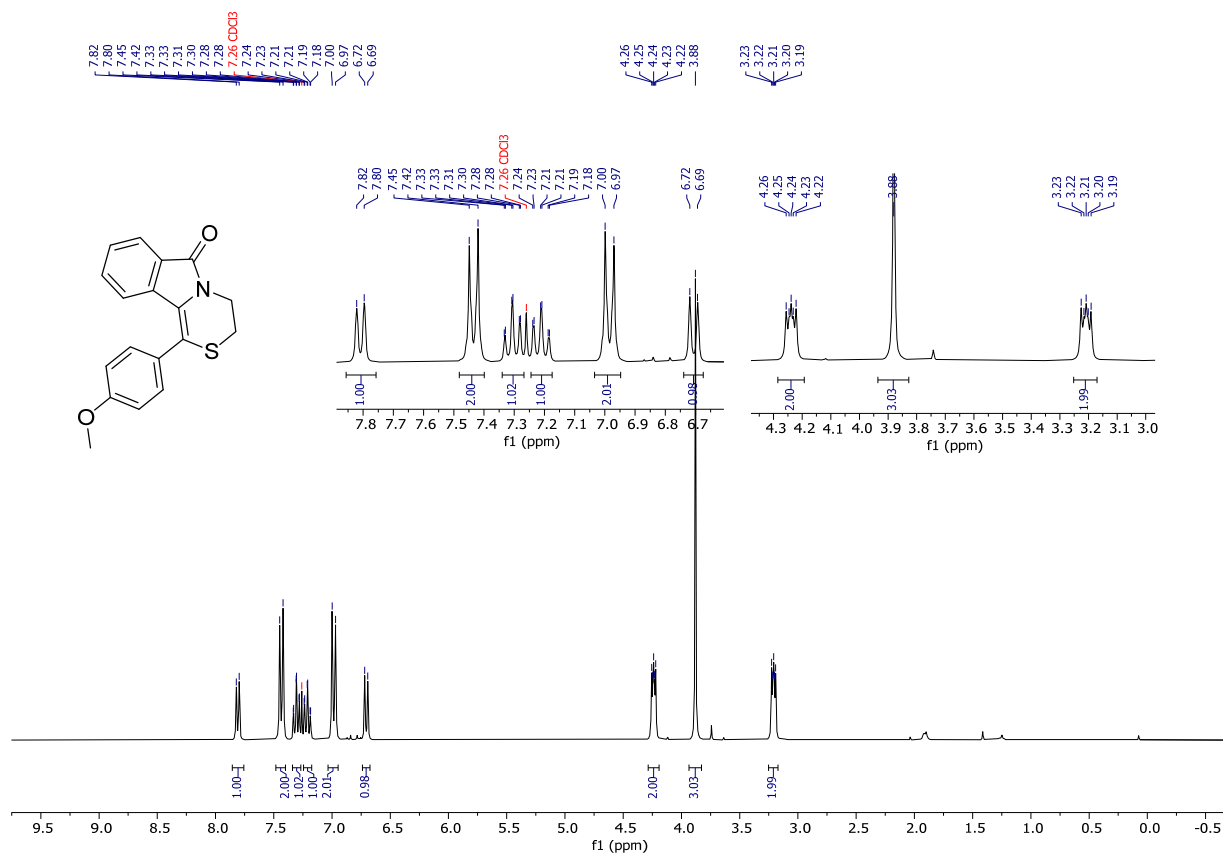

<sup>1</sup>H NMR spectrum of compound 8c

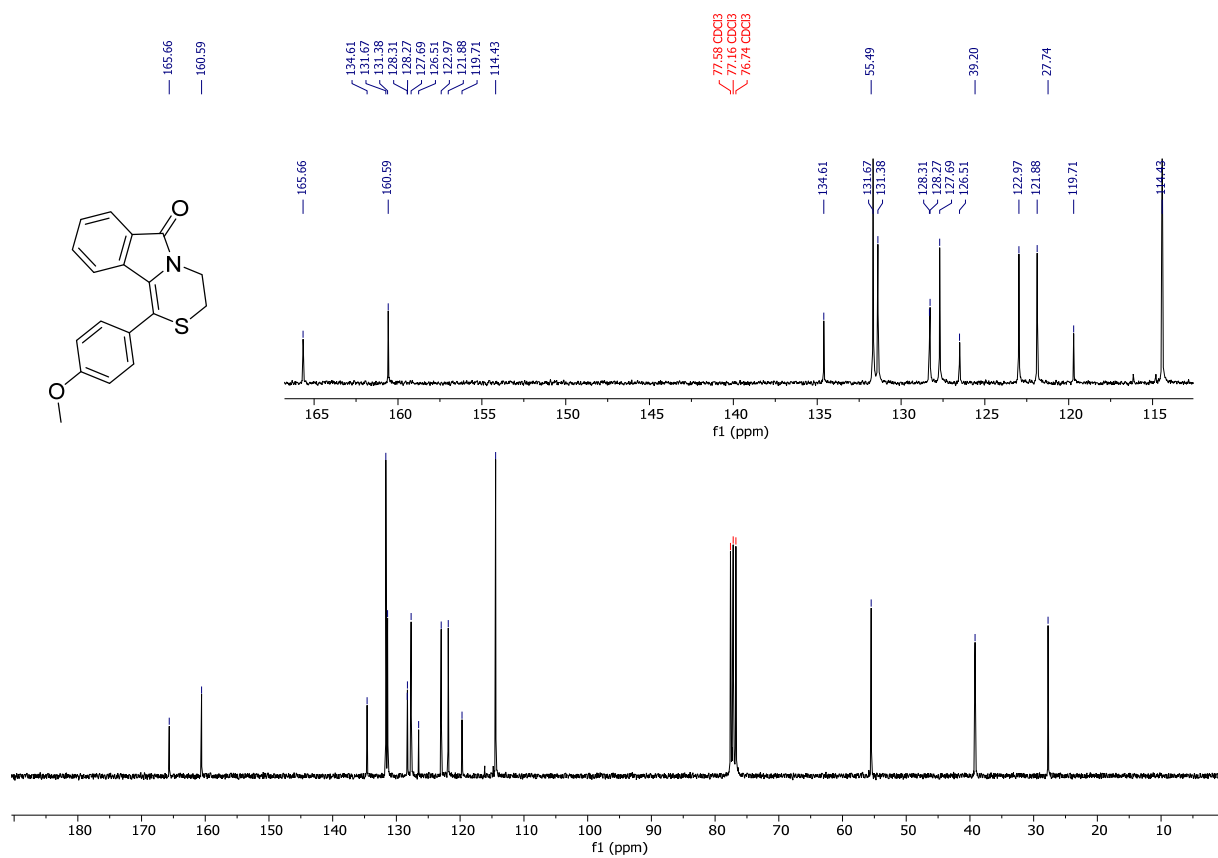

<sup>13</sup>C NMR spectrum of compound 8c

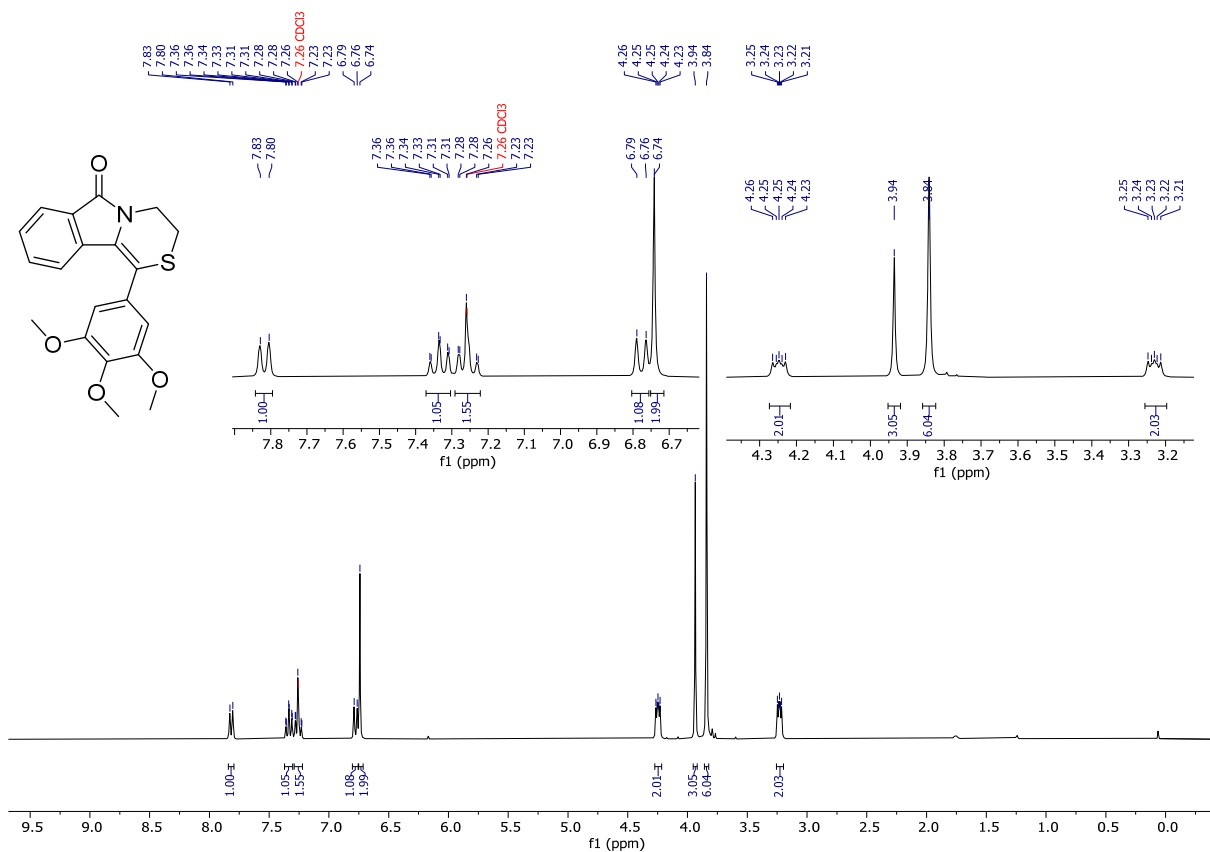

<sup>1</sup>H NMR spectrum of compound 8d

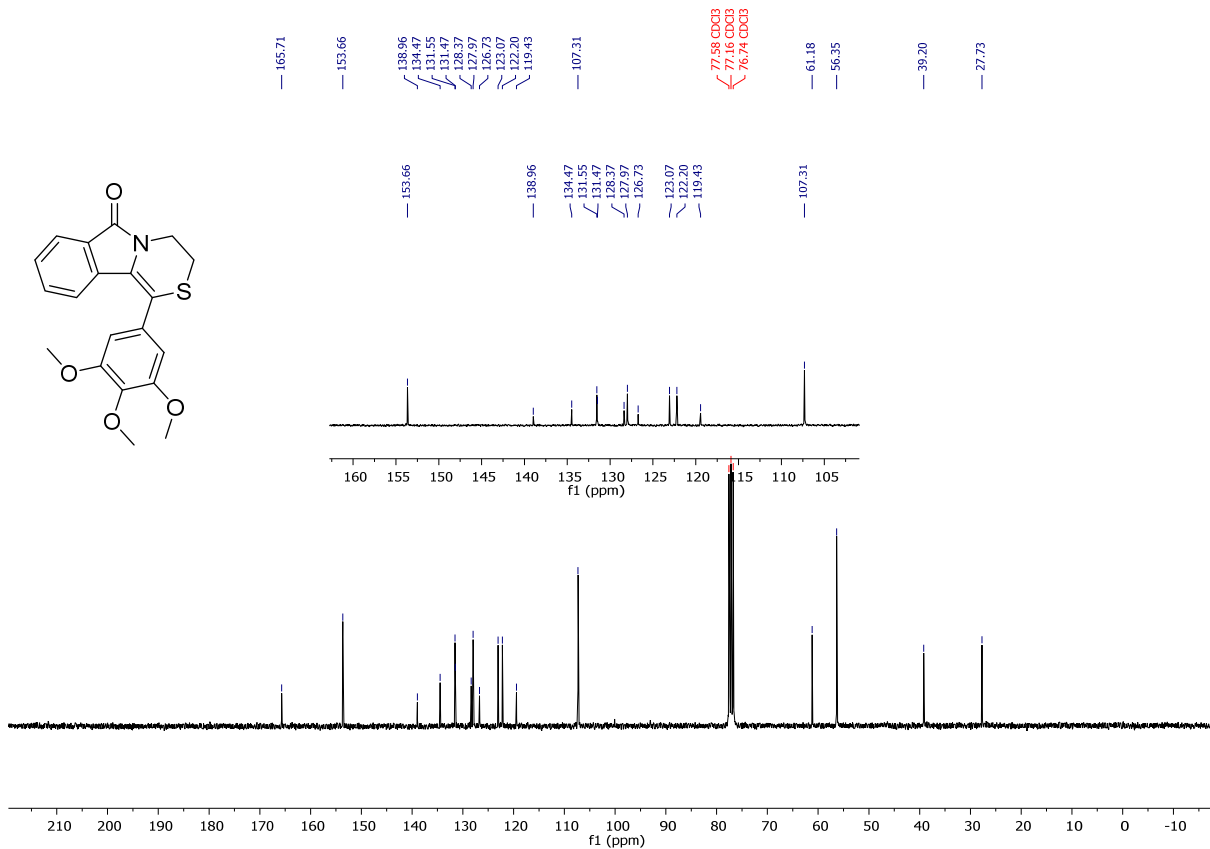

<sup>13</sup>C NMR spectrum of compound 8d

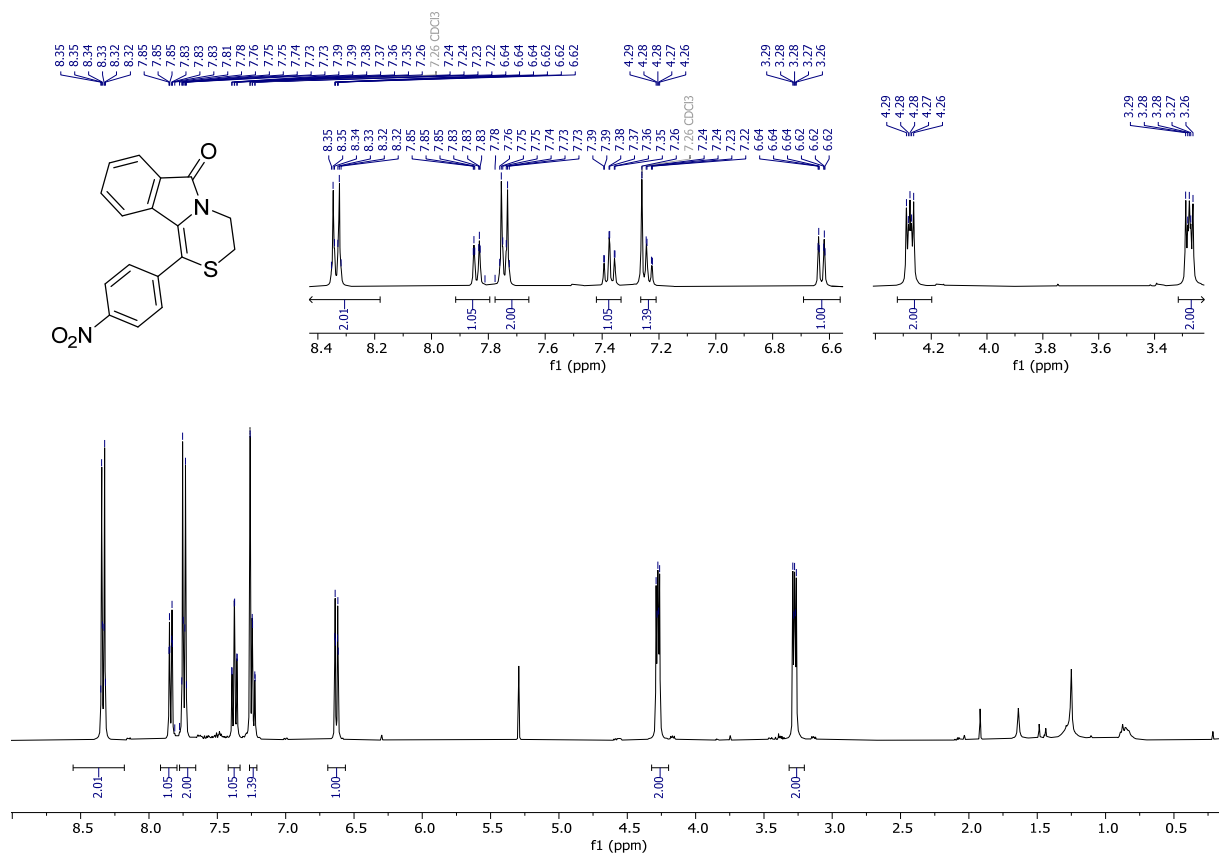

<sup>1</sup>H NMR spectrum of compound **8e**

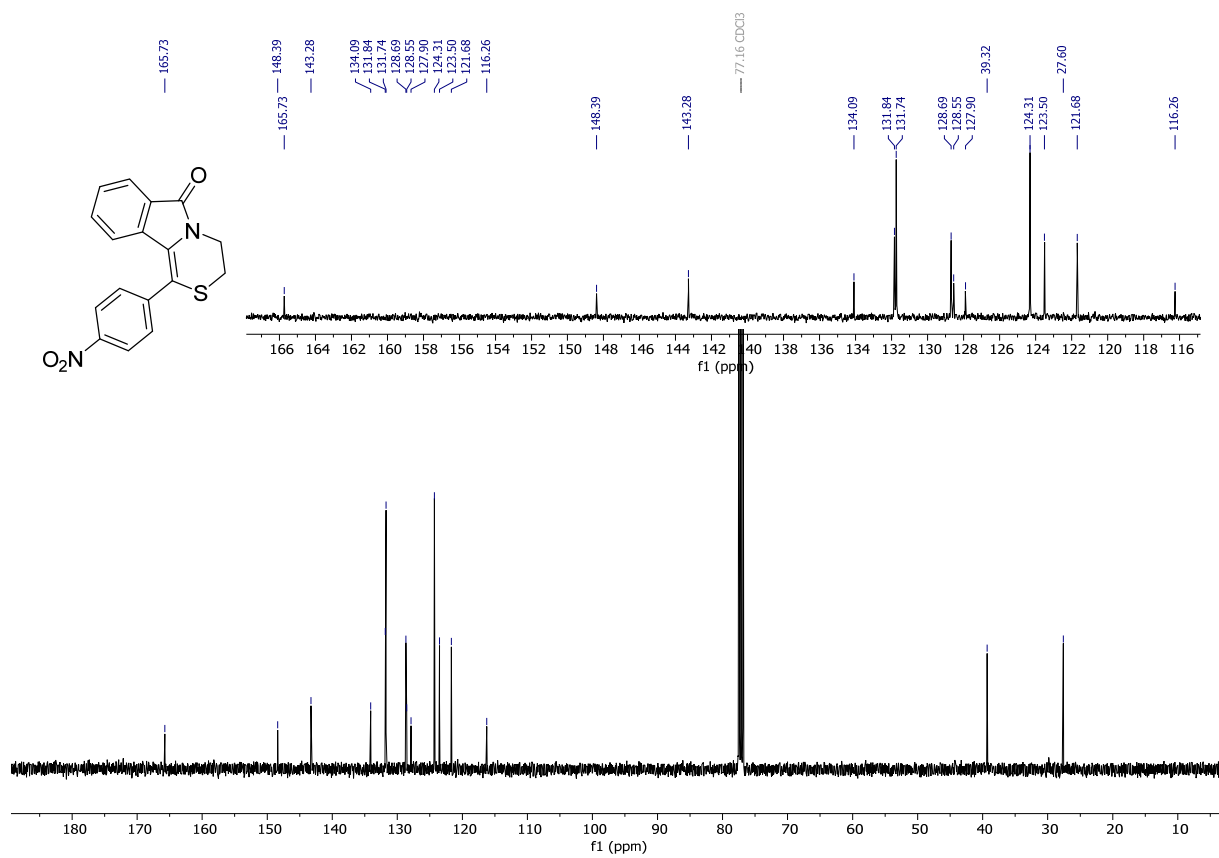

<sup>13</sup>C NMR spectrum of compound **8e**

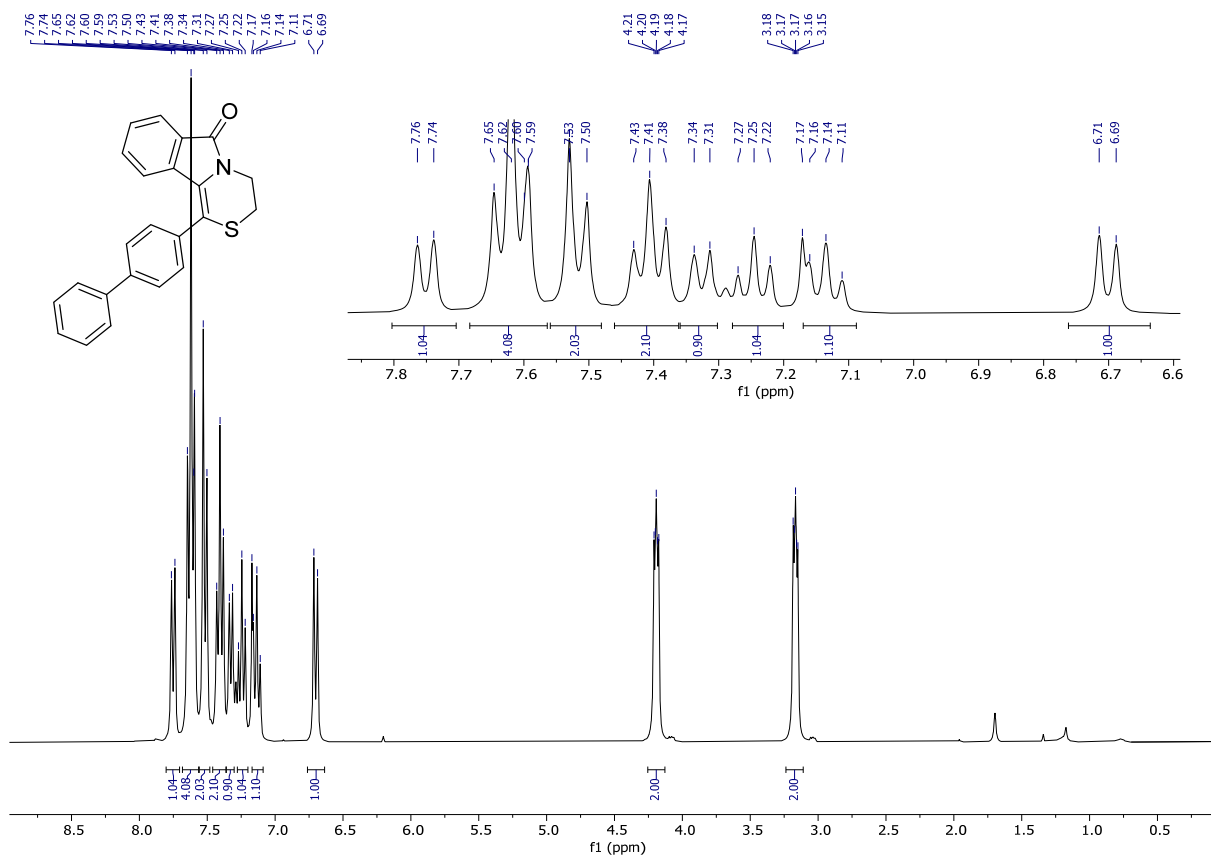

**<sup>1</sup>H NMR spectrum of compound 8f**

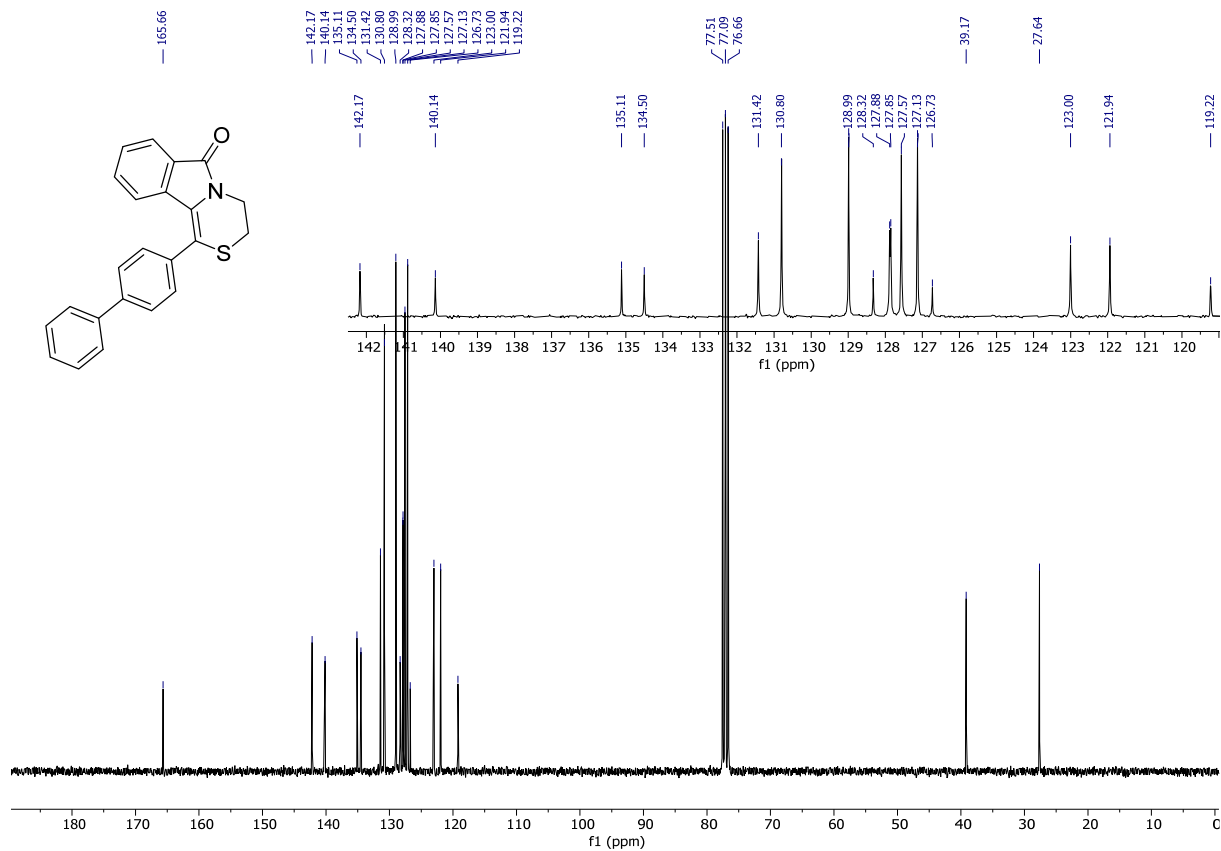

**<sup>13</sup>C NMR spectrum of compound 8f**

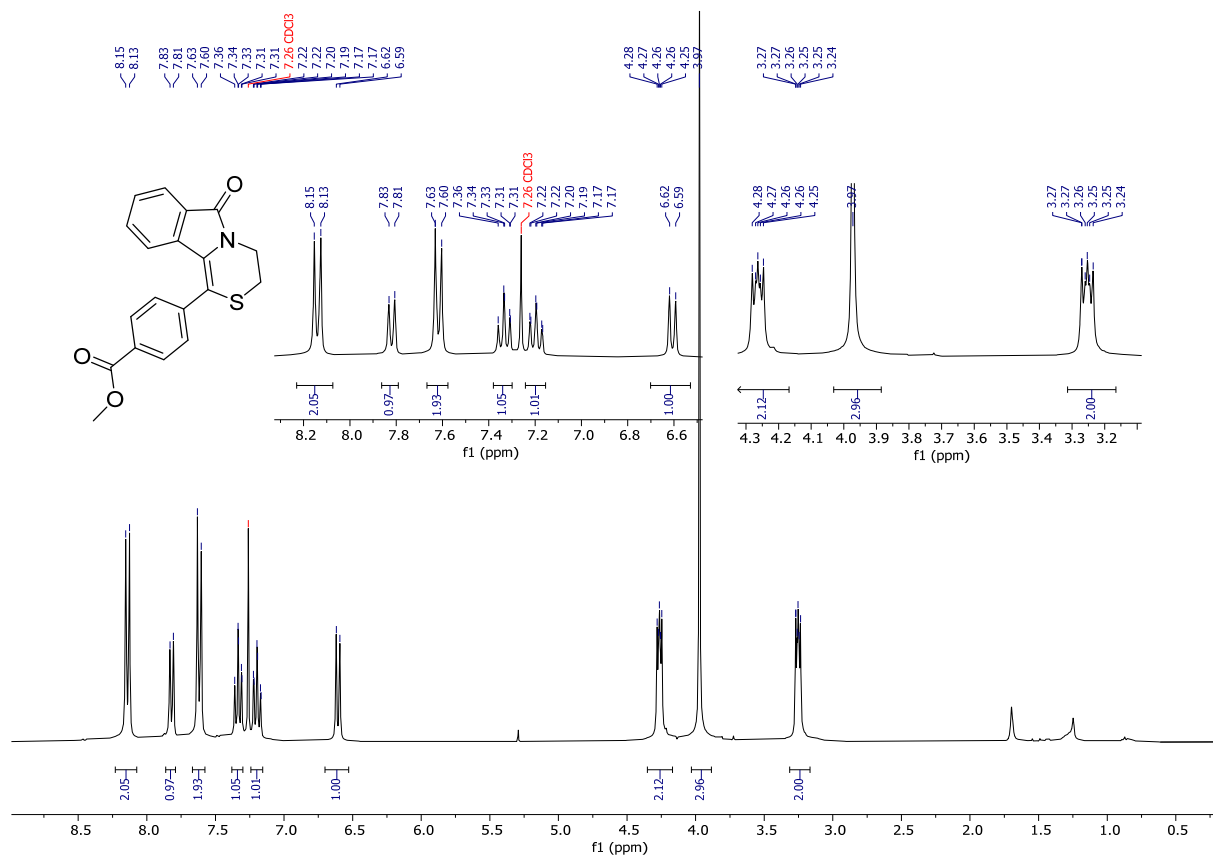

<sup>1</sup>H NMR spectrum of compound 8g

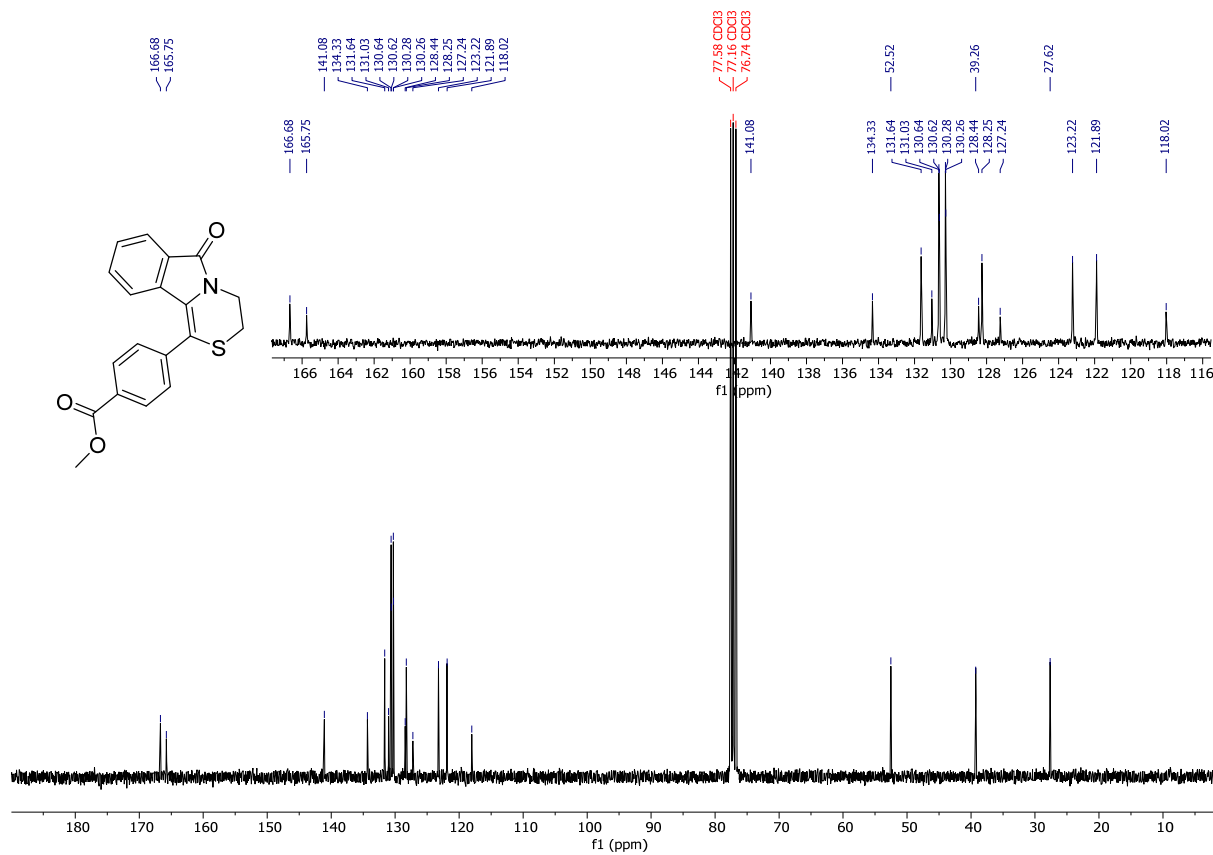

<sup>13</sup>C NMR spectrum of compound 8g



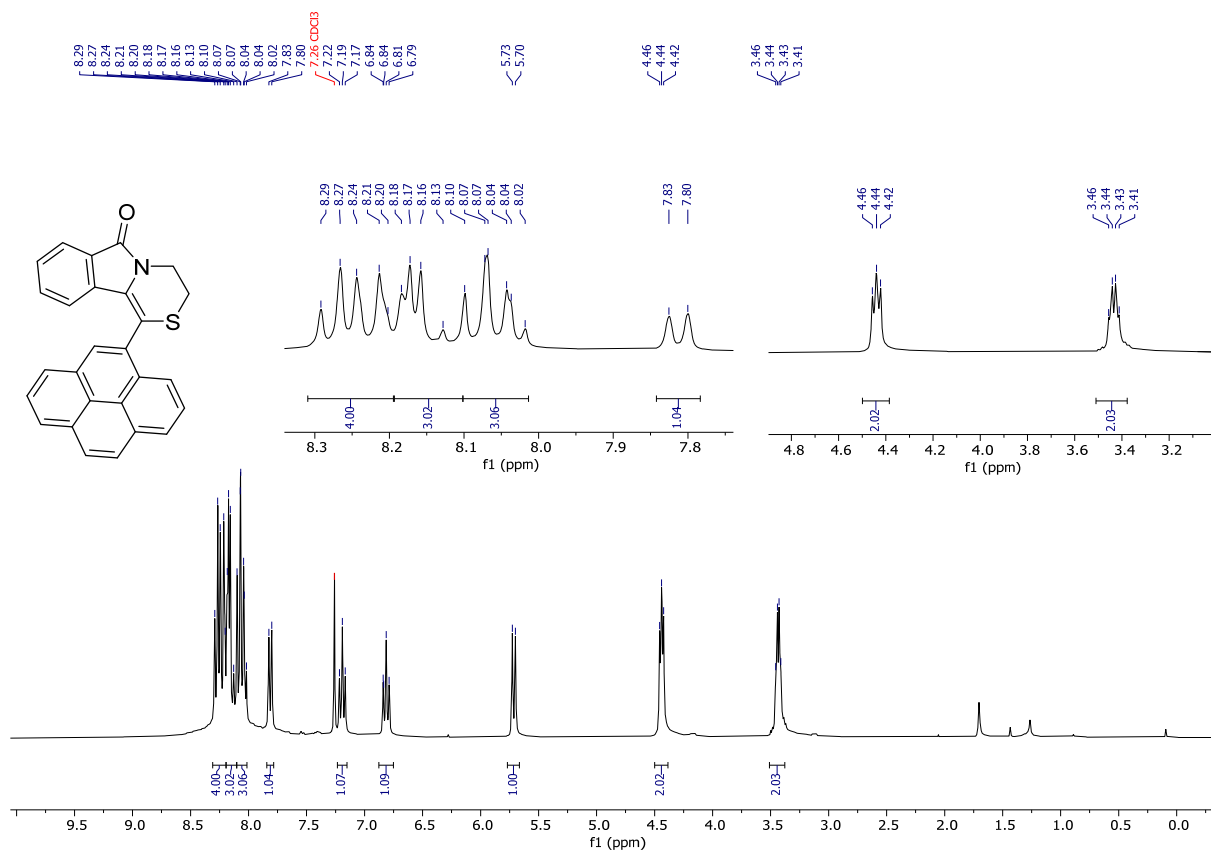

**<sup>1</sup>H NMR spectrum of compound 8i**

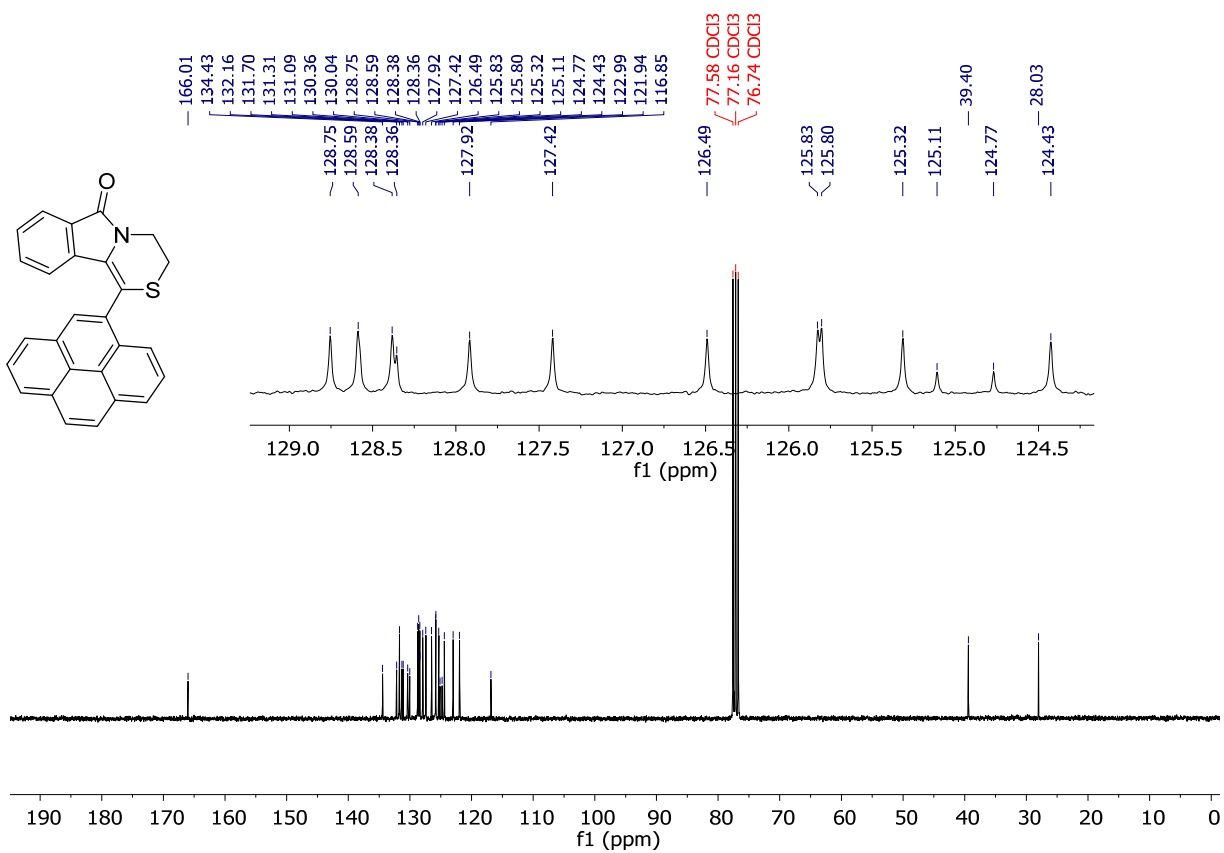

**<sup>13</sup>C NMR spectrum of compound 8i**

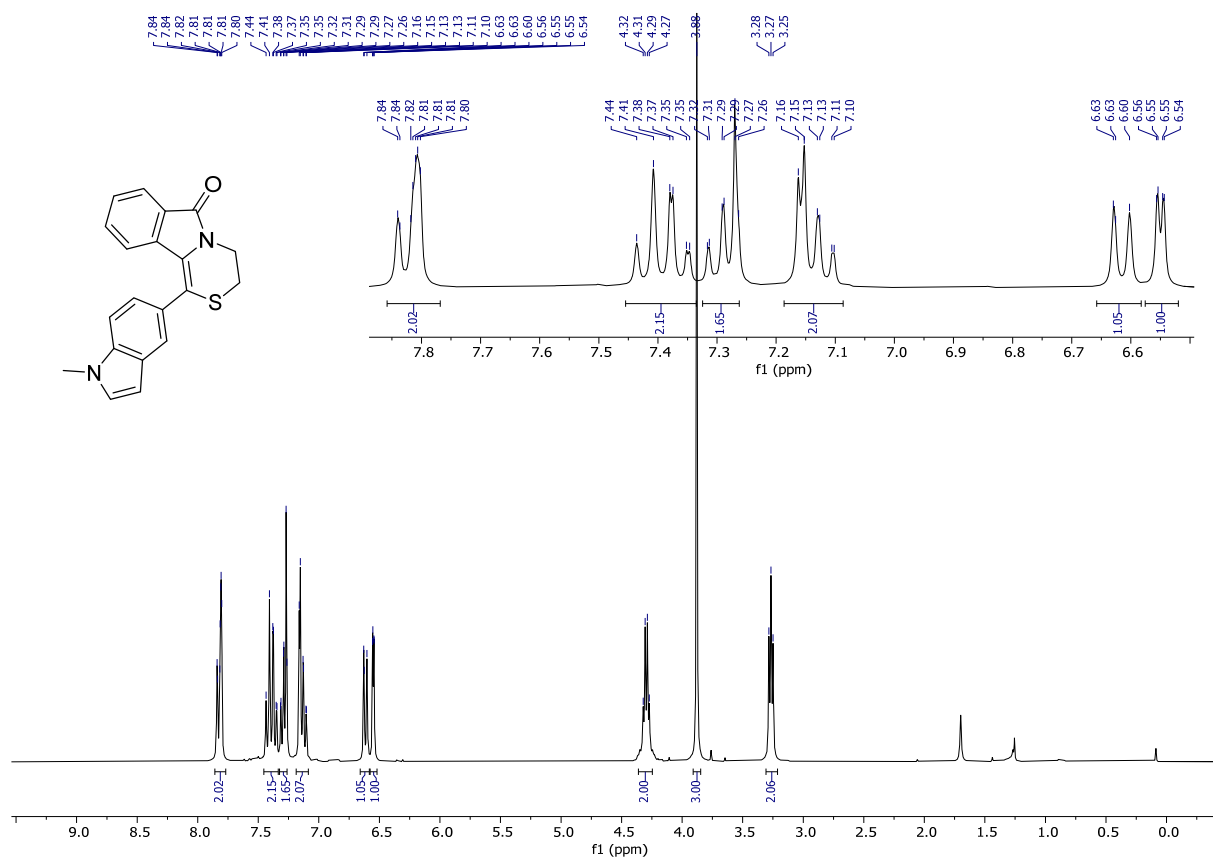

<sup>1</sup>H NMR spectrum of compound 8k

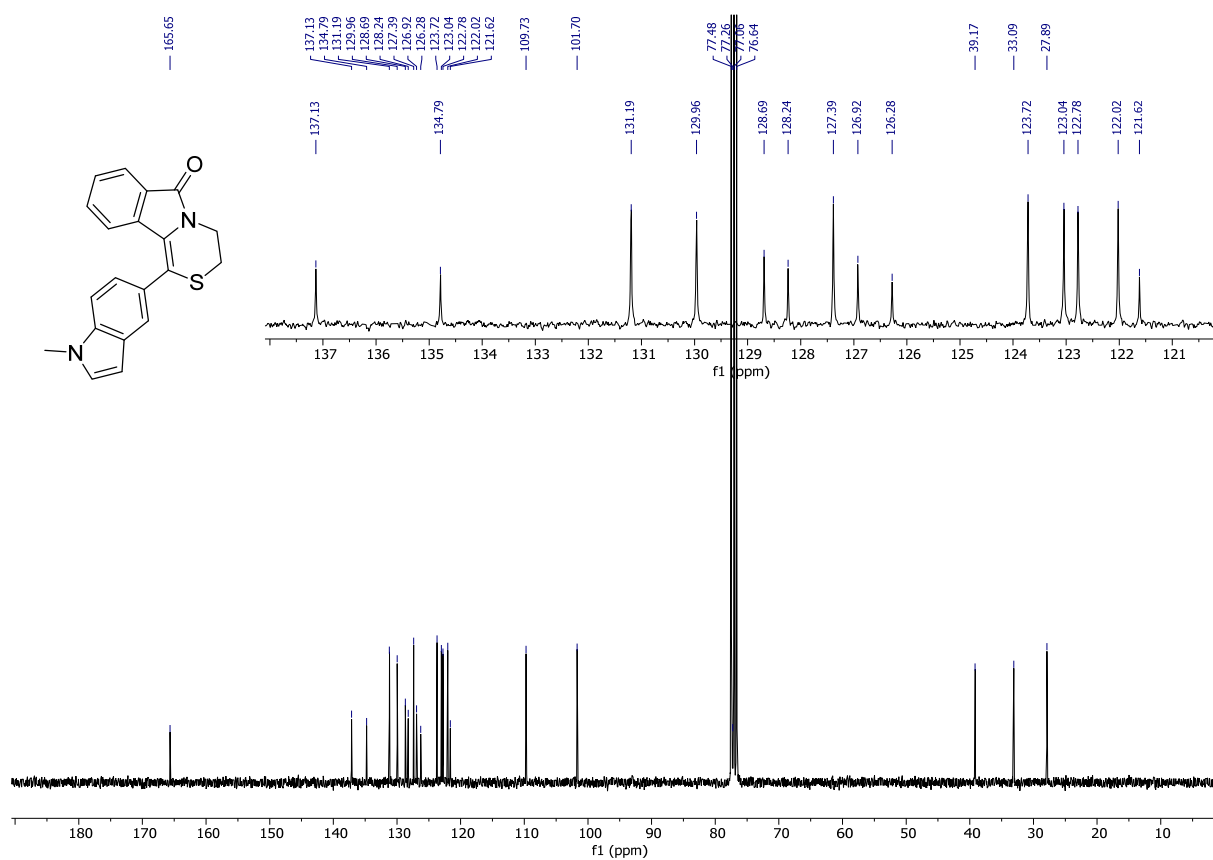

<sup>13</sup>C NMR spectrum of compound 8k

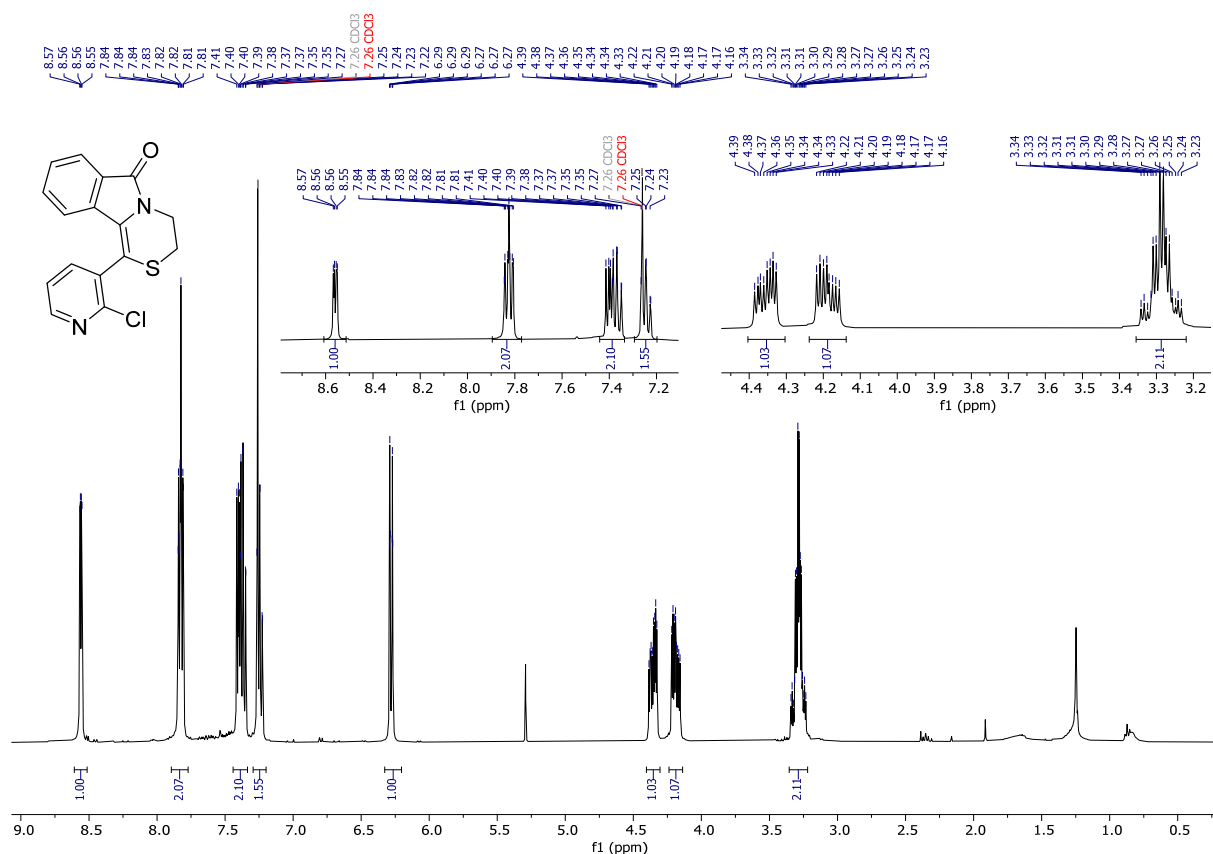

<sup>1</sup>H NMR spectrum of compound 81

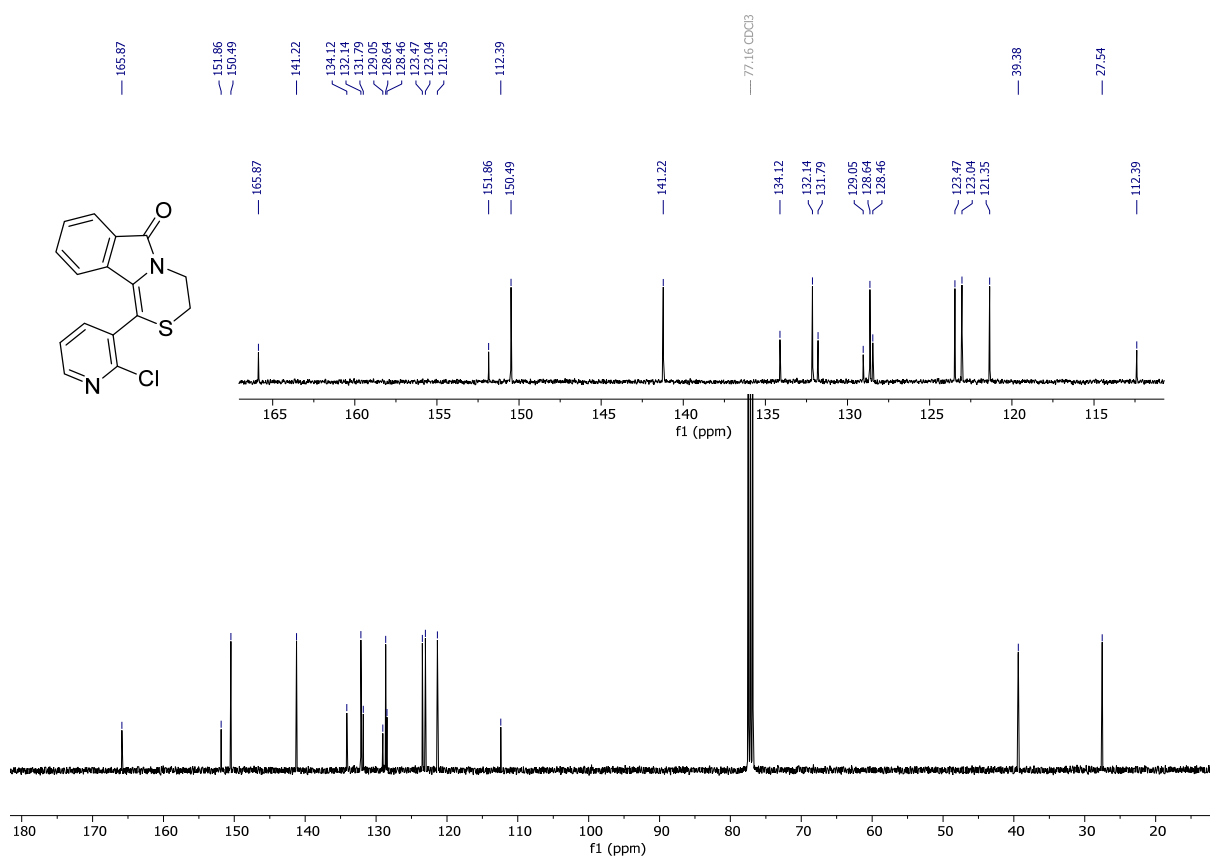

<sup>13</sup>C NMR spectrum of compound 81

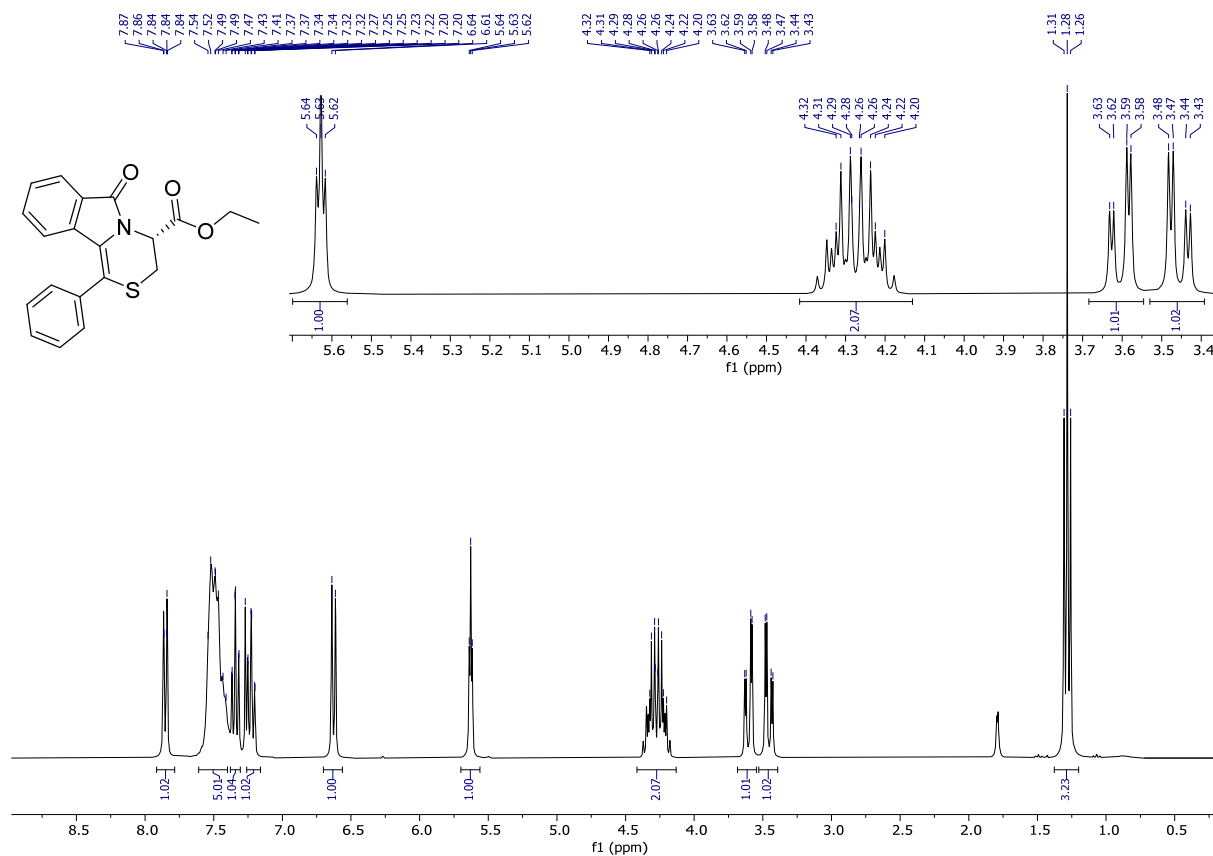

**<sup>1</sup>H NMR spectrum of compound 8m**

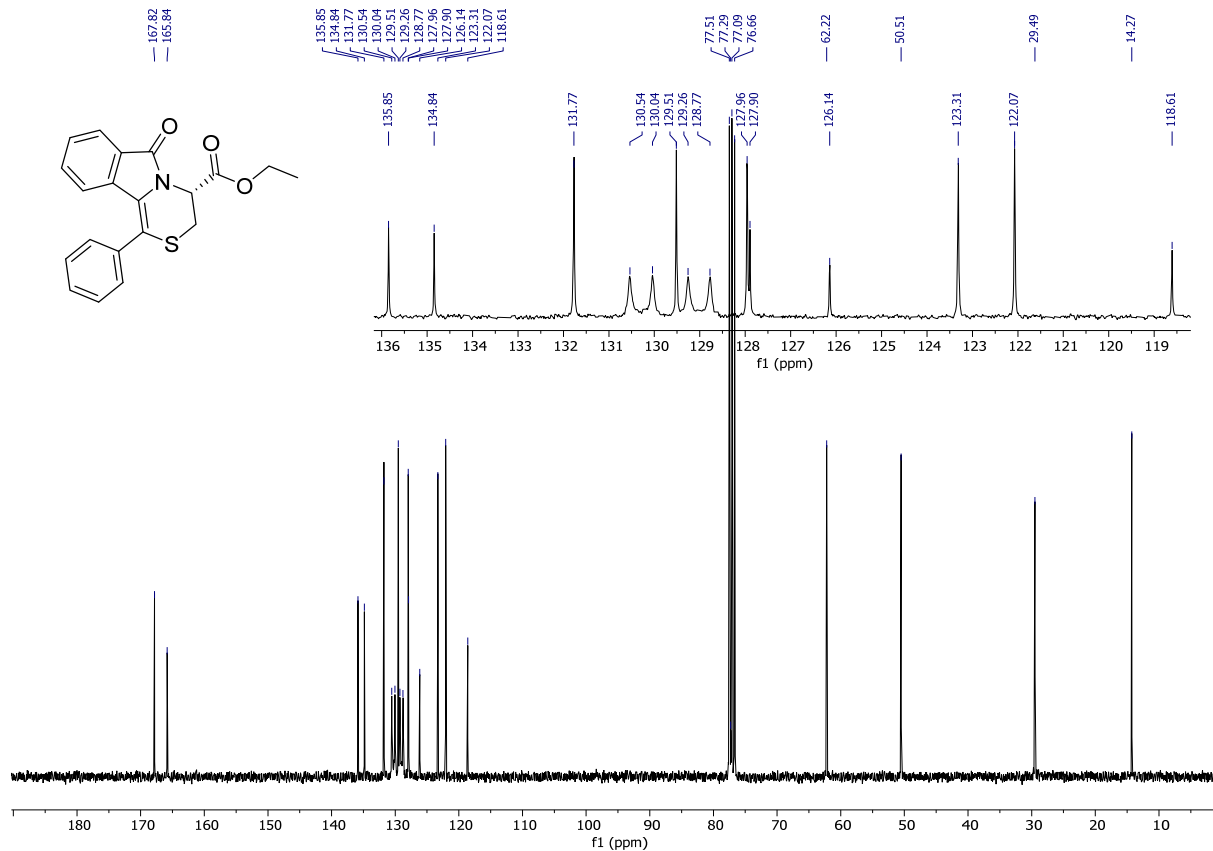

**<sup>13</sup>C NMR spectrum of compound 8m**



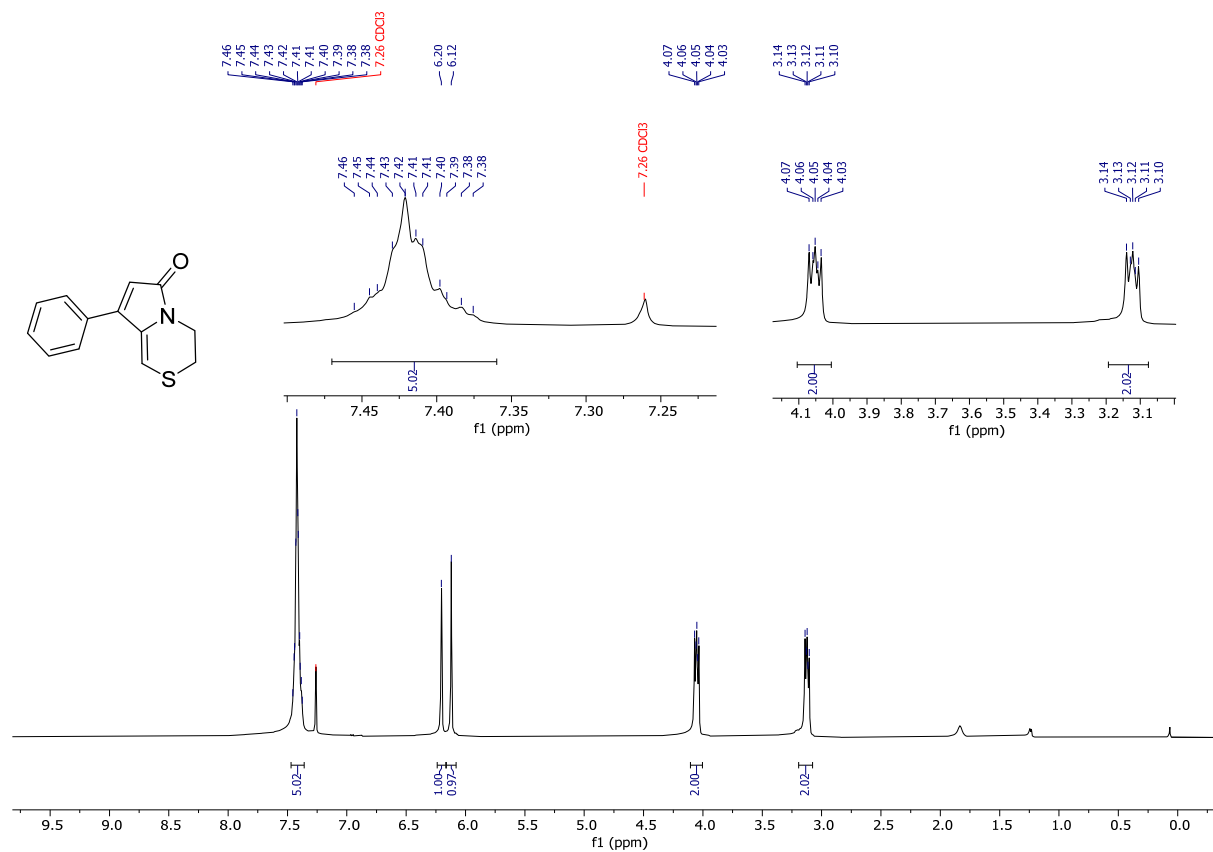

**<sup>1</sup>H NMR spectrum of compound 8o**

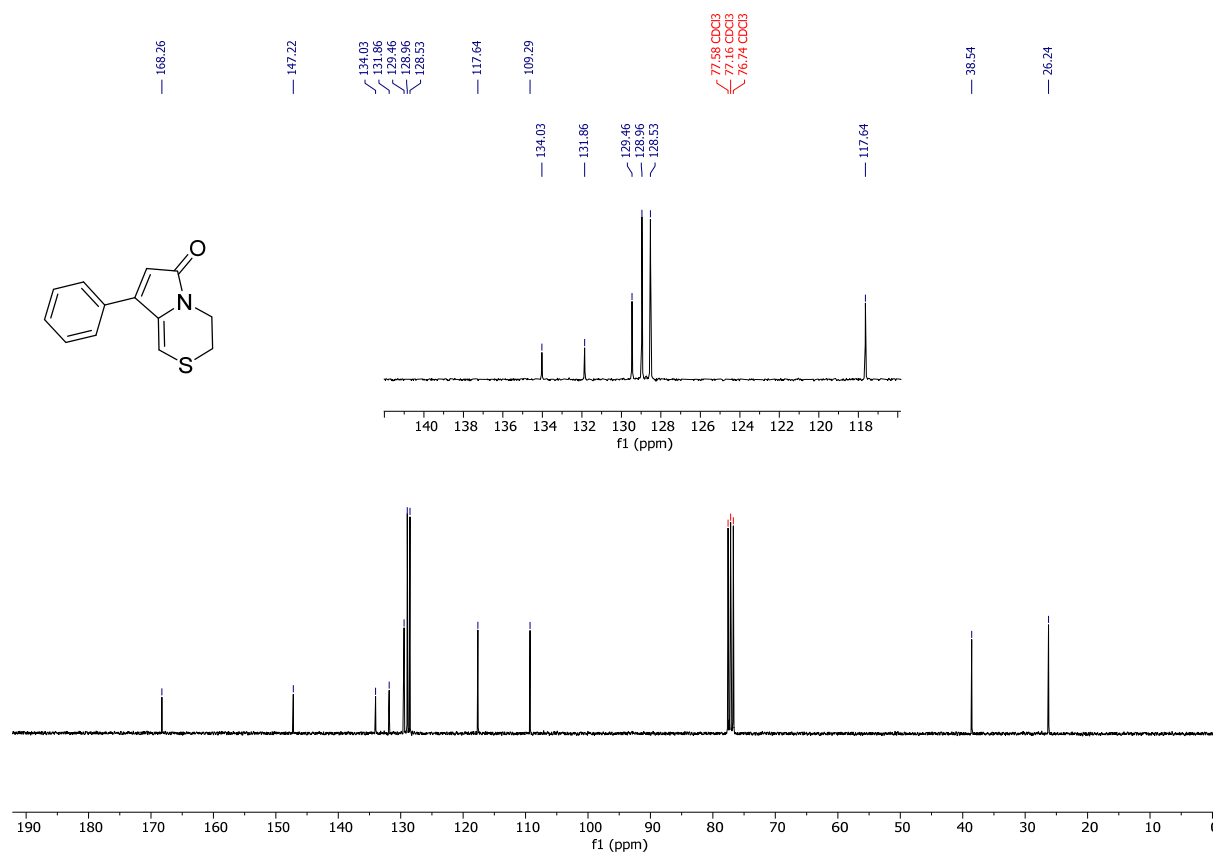

**<sup>13</sup>C NMR spectrum of compound 8o**



## **XI. Structural crystallographic data**

## checkCIF/PLATON report

Structure factors have been supplied for datablock(s) fd1551

THIS REPORT IS FOR GUIDANCE ONLY. IF USED AS PART OF A REVIEW PROCEDURE FOR PUBLICATION, IT SHOULD NOT REPLACE THE EXPERTISE OF AN EXPERIENCED CRYSTALLOGRAPHIC REFEREE.

No syntax errors found.      CIF dictionary      Interpreting this report

### Datablock: fd1551 (Product 7dB)

---

Bond precision:      C-C = 0.0036 Å      Wavelength=1.54186

Cell:                      a=12.0292 (4)      b=4.1018 (1)      c=15.6950 (4)  
                                    alpha=90      beta=92.149 (2)      gamma=90

Temperature:              100 K

|                        | Calculated     | Reported       |
|------------------------|----------------|----------------|
| Volume                 | 773.87 (4)     | 773.87 (4)     |
| Space group            | P 21/c         | P 1 21/c 1     |
| Hall group             | -P 2ybc        | -P 2ybc        |
| Moiety formula         | C7 H6 Br N O S | C7 H6 Br N O S |
| Sum formula            | C7 H6 Br N O S | C7 H6 Br N O S |
| Mr                     | 232.09         | 232.10         |
| Dx, g cm <sup>-3</sup> | 1.992          | 1.992          |
| Z                      | 4              | 4              |
| Mu (mm <sup>-1</sup> ) | 9.242          | 9.242          |
| F000                   | 456.0          | 456.0          |
| F000'                  | 455.45         |                |
| h, k, lmax             | 14, 5, 19      | 14, 5, 18      |
| Nref                   | 1508           | 1465           |
| Tmin, Tmax             | 0.304, 0.630   | 0.065, 0.214   |
| Tmin'                  | 0.045          |                |

Correction method= # Reported T Limits: Tmin=0.065 Tmax=0.214  
AbsCorr = MULTI-SCAN

Data completeness= 0.971      Theta(max)= 72.162

R(reflections)= 0.0313 ( 1439)

wR2(reflections)=  
0.0825 ( 1465)

S = 1.070

Npar= 100

---

The following ALERTS were generated. Each ALERT has the format

**test-name\_ALERT\_alert-type\_alert-level.**

Click on the hyperlinks for more details of the test.

---

**Alert level C**

PLAT911\_ALERT\_3\_C Missing FCF Refl Between Thmin & STh/L= 0.600 10 Report  
-10 3 6, -10 3 7, -8 3 8, 5 0 16, 6 0 16, 6 1 16,  
7 0 16, -1 0 18, 2 0 18, 3 0 18,

---

**Alert level G**

PLAT912\_ALERT\_4\_G Missing # of FCF Reflections Above STh/L= 0.600 33 Note  
PLAT941\_ALERT\_3\_G Average HKL Measurement Multiplicity ..... 4.7 Low  
PLAT969\_ALERT\_5\_G The 'Henn et al.' R-Factor-gap value ..... 7.036 Note  
Predicted wR2: Based on SigI\*\*2 1.17 or SHELX Weight 7.71  
PLAT978\_ALERT\_2\_G Number C-C Bonds with Positive Residual Density. 3 Info

---

- 0 **ALERT level A** = Most likely a serious problem - resolve or explain
- 0 **ALERT level B** = A potentially serious problem, consider carefully
- 1 **ALERT level C** = Check. Ensure it is not caused by an omission or oversight
- 4 **ALERT level G** = General information/check it is not something unexpected

- 0 ALERT type 1 CIF construction/syntax error, inconsistent or missing data
  - 1 ALERT type 2 Indicator that the structure model may be wrong or deficient
  - 2 ALERT type 3 Indicator that the structure quality may be low
  - 1 ALERT type 4 Improvement, methodology, query or suggestion
  - 1 ALERT type 5 Informative message, check
- 
-

It is advisable to attempt to resolve as many as possible of the alerts in all categories. Often the minor alerts point to easily fixed oversights, errors and omissions in your CIF or refinement strategy, so attention to these fine details can be worthwhile. In order to resolve some of the more serious problems it may be necessary to carry out additional measurements or structure refinements. However, the purpose of your study may justify the reported deviations and the more serious of these should normally be commented upon in the discussion or experimental section of a paper or in the "special\_details" fields of the CIF. checkCIF was carefully designed to identify outliers and unusual parameters, but every test has its limitations and alerts that are not important in a particular case may appear. Conversely, the absence of alerts does not guarantee there are no aspects of the results needing attention. It is up to the individual to critically assess their own results and, if necessary, seek expert advice.

### **Publication of your CIF in IUCr journals**

A basic structural check has been run on your CIF. These basic checks will be run on all CIFs submitted for publication in IUCr journals (*Acta Crystallographica*, *Journal of Applied Crystallography*, *Journal of Synchrotron Radiation*); however, if you intend to submit to *Acta Crystallographica Section C* or *E* or *IUCrData*, you should make sure that full publication checks are run on the final version of your CIF prior to submission.

### **Publication of your CIF in other journals**

Please refer to the *Notes for Authors* of the relevant journal for any special instructions relating to CIF submission.

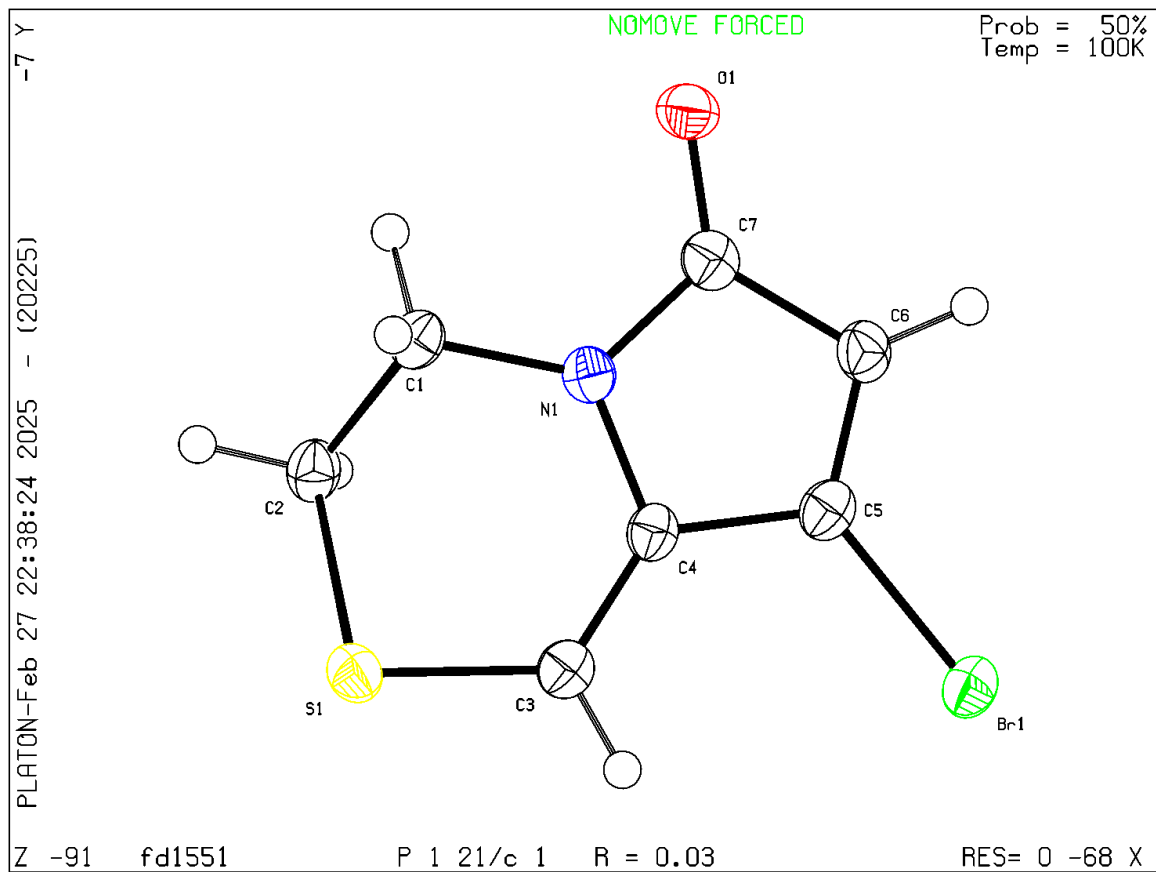

## checkCIF/PLATON report

Structure factors have been supplied for datablock(s) shs\_6530\_algh\_auto

THIS REPORT IS FOR GUIDANCE ONLY. IF USED AS PART OF A REVIEW PROCEDURE FOR PUBLICATION, IT SHOULD NOT REPLACE THE EXPERTISE OF AN EXPERIENCED CRYSTALLOGRAPHIC REFEREE.

No syntax errors found.      CIF dictionary      Interpreting this report

### Datablock: shs\_6530\_algh\_auto (Prodcut 8b)

---

Bond precision:      C-C = 0.0047 A

Wavelength=0.71073

Cell:                      a=9.8420 (7)  
                              alpha=108.055 (6)

                              b=13.3225 (9)  
                              beta=93.614 (6)

                              c=15.5328 (12)  
                              gamma=108.512 (6)

Temperature:      293 K

|                        | Calculated       | Reported          |
|------------------------|------------------|-------------------|
| Volume                 | 1806.5 (3)       | 1806.5 (2)        |
| Space group            | P -1             | P -1              |
| Hall group             | -P 1             | -P 1              |
| Moiety formula         | C21 H21 N O S    | 2 (C21 H21 N O S) |
| Sum formula            | C42 H42 N2 O2 S2 |                   |
| Mr                     | 335.45           | 670.89            |
| Dx, g cm <sup>-3</sup> | 1.233            | 1.233             |
| Z                      | 4                | 2                 |
| Mu (mm <sup>-1</sup> ) | 0.186            | 0.186             |
| F000                   | 712.0            | 712.0             |
| F000'                  | 712.75           |                   |
| h, k, lmax             | 11, 15, 18       | 11, 15, 18        |
| Nref                   | 6397             | 6394              |
| Tmin, Tmax             | 0.989, 0.991     |                   |
| Tmin'                  | 0.982            |                   |

Correction method= Not given

Data completeness= 1.000

Theta (max)= 25.026

R(reflections)= 0.0608 ( 3637)

wR2(reflections)=  
0.1383 ( 6394)

S = 1.013

Npar= 441

---

The following ALERTS were generated. Each ALERT has the format

**test-name\_ALERT\_alert-type\_alert-level.**

Click on the hyperlinks for more details of the test.

---

● **Alert level C**

|                   |                                                 |                |              |
|-------------------|-------------------------------------------------|----------------|--------------|
| PLAT041_ALERT_1_C | Calc. and Reported SumFormula                   | Strings Differ | Please Check |
|                   | Calc: C21 H21 N O S                             |                |              |
|                   | Rep.: C42 H42 N2 O2 S2                          |                |              |
| PLAT042_ALERT_1_C | Calc. and Reported MoietyFormula                | Strings Differ | Please Check |
|                   | Calc: C21 H21 N O S                             |                |              |
|                   | Rep.: 2(C21 H21 N O S)                          |                |              |
| PLAT052_ALERT_1_C | Info on Absorption Correction Method            | Not Given      | Please Do !  |
| PLAT230_ALERT_2_C | Hirshfeld Test Diff for C18A                    | --C20A         | 6.0 s.u.     |
| PLAT242_ALERT_2_C | Low 'MainMol' Ueq as Compared to Neighbors of   |                | C18B Check   |
| PLAT242_ALERT_2_C | Low 'MainMol' Ueq as Compared to Neighbors of   |                | C18A Check   |
| PLAT340_ALERT_3_C | Low Bond Precision on C-C Bonds .....           |                | 0.00474 Ang. |
| PLAT906_ALERT_3_C | Large K Value in the Analysis of Variance ..... |                | 15.496 Check |
| PLAT906_ALERT_3_C | Large K Value in the Analysis of Variance ..... |                | 3.455 Check  |
| PLAT911_ALERT_3_C | Missing FCF Refl Between Thmin & STh/L=         | 0.595          | 2 Report     |
|                   | 1 -7 2, 1 -2 5,                                 |                |              |

---

● **Alert level G**

|                   |                                                  |                      |               |
|-------------------|--------------------------------------------------|----------------------|---------------|
| PLAT002_ALERT_2_G | Number of Distance or Angle Restraints on AtSite |                      | 7 Note        |
| PLAT045_ALERT_1_G | Calculated and Reported Z Differ by a Factor ... |                      | 2 Check       |
| PLAT154_ALERT_1_G | The s.u.'s on the Cell Angles are Equal ..(Note) |                      | 0.006 Degree  |
| PLAT171_ALERT_4_G | The CIF-Embedded .res File Contains EADP Records |                      | 1 Report      |
| PLAT176_ALERT_4_G | The CIF-Embedded .res File Contains SADI Records |                      | 1 Report      |
| PLAT191_ALERT_3_G | A Non-default SADI Restraint Value has been used |                      | 0.0100 Report |
| PLAT199_ALERT_1_G | Reported _cell_measurement_temperature .....     | (K)                  | 293 Check     |
| PLAT200_ALERT_1_G | Reported _diffrn_ambient_temperature .....       | (K)                  | 293 Check     |
| PLAT230_ALERT_2_G | Hirshfeld Test Diff for C18B                     | --C19B               | 17.3 s.u.     |
| PLAT230_ALERT_2_G | Hirshfeld Test Diff for C18B                     | --C20B               | 25.0 s.u.     |
| PLAT230_ALERT_2_G | Hirshfeld Test Diff for C18B                     | --C21B               | 14.3 s.u.     |
| PLAT230_ALERT_2_G | Hirshfeld Test Diff for C18B                     | --C19X               | 14.7 s.u.     |
| PLAT230_ALERT_2_G | Hirshfeld Test Diff for C18B                     | --C20X               | 20.3 s.u.     |
| PLAT230_ALERT_2_G | Hirshfeld Test Diff for C18B                     | --C21X               | 23.3 s.u.     |
| PLAT301_ALERT_3_G | Main Residue Disorder .....                      | (Resd 1)             | 13% Note      |
| PLAT412_ALERT_2_G | Short Intra XH3 .. XHn H14B                      | ..H21A               | 2.11 Ang.     |
|                   |                                                  | x,y,z =              | 1_555 Check   |
| PLAT720_ALERT_4_G | Number of Unusual/Non-Standard Labels .....      |                      | 8 Note        |
|                   | H1BA H1BB H2BA H2BB H1AA H1AB H2AA               | H2AB                 |               |
| PLAT860_ALERT_3_G | Number of Least-Squares Restraints .....         |                      | 15 Note       |
| PLAT910_ALERT_3_G | Missing # of FCF Reflection(s) Below Theta(Min). |                      | 1 Note        |
|                   | 0 0 1,                                           |                      |               |
| PLAT933_ALERT_2_G | Number of HKL-OMIT Records in Embedded .res File |                      | 2 Note        |
|                   | 1 -7 2, 1 -2 5,                                  |                      |               |
| PLAT941_ALERT_3_G | Average HKL Measurement Multiplicity .....       |                      | 2.7 Low       |
| PLAT969_ALERT_5_G | The 'Henn et al.' R-Factor-gap value .....       |                      | 2.305 Note    |
|                   | Predicted wR2: Based on SigI**2                  | 6.00 or SHELX Weight | 13.66         |
| PLAT978_ALERT_2_G | Number C-C Bonds with Positive Residual Density. |                      | 3 Info        |

---

0 **ALERT level A** = Most likely a serious problem - resolve or explain

0 **ALERT level B** = A potentially serious problem, consider carefully

10 **ALERT level C** = Check. Ensure it is not caused by an omission or oversight  
23 **ALERT level G** = General information/check it is not something unexpected

7 ALERT type 1 CIF construction/syntax error, inconsistent or missing data  
13 ALERT type 2 Indicator that the structure model may be wrong or deficient  
9 ALERT type 3 Indicator that the structure quality may be low  
3 ALERT type 4 Improvement, methodology, query or suggestion  
1 ALERT type 5 Informative message, check

---

---

It is advisable to attempt to resolve as many as possible of the alerts in all categories. Often the minor alerts point to easily fixed oversights, errors and omissions in your CIF or refinement strategy, so attention to these fine details can be worthwhile. In order to resolve some of the more serious problems it may be necessary to carry out additional measurements or structure refinements. However, the purpose of your study may justify the reported deviations and the more serious of these should normally be commented upon in the discussion or experimental section of a paper or in the "special\_details" fields of the CIF. checkCIF was carefully designed to identify outliers and unusual parameters, but every test has its limitations and alerts that are not important in a particular case may appear. Conversely, the absence of alerts does not guarantee there are no aspects of the results needing attention. It is up to the individual to critically assess their own results and, if necessary, seek expert advice.

### **Publication of your CIF in IUCr journals**

A basic structural check has been run on your CIF. These basic checks will be run on all CIFs submitted for publication in IUCr journals (*Acta Crystallographica*, *Journal of Applied Crystallography*, *Journal of Synchrotron Radiation*); however, if you intend to submit to *Acta Crystallographica Section C* or *E* or *IUCrData*, you should make sure that full publication checks are run on the final version of your CIF prior to submission.

### **Publication of your CIF in other journals**

Please refer to the *Notes for Authors* of the relevant journal for any special instructions relating to CIF submission.

---

**PLATON version of 02/02/2025; check.def file version of 02/02/2025**

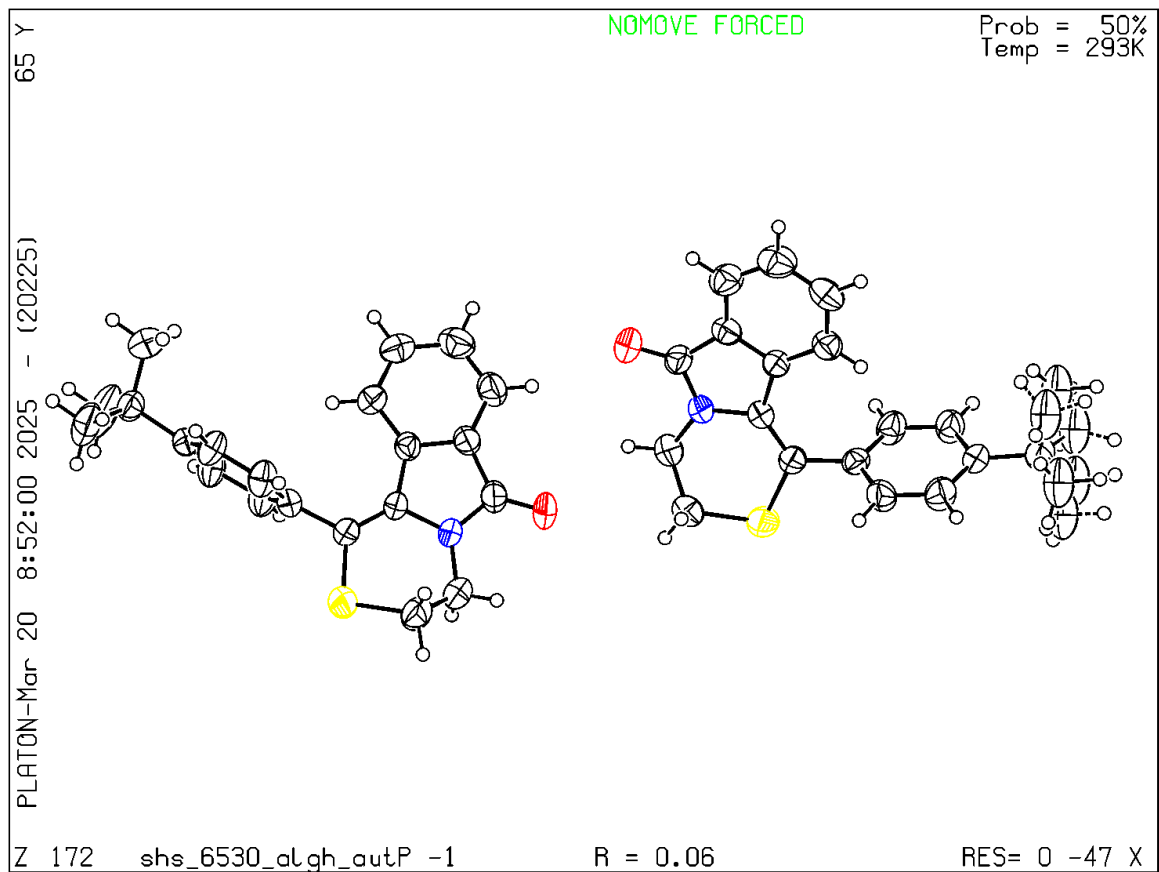

## checkCIF/PLATON report

Structure factors have been supplied for datablock(s) shs\_871\_algh\_auto

THIS REPORT IS FOR GUIDANCE ONLY. IF USED AS PART OF A REVIEW PROCEDURE FOR PUBLICATION, IT SHOULD NOT REPLACE THE EXPERTISE OF AN EXPERIENCED CRYSTALLOGRAPHIC REFEREE.

No syntax errors found.      CIF dictionary      Interpreting this report

### Datablock: shs\_871\_algh\_auto (Product 8d)

---

Bond precision:      C-C = 0.0034 Å      Wavelength=1.54184

Cell:                      a=28.9306 (7)      b=8.7354 (2)      c=14.5461 (5)  
                                alpha=90              beta=98.643 (3)      gamma=90

Temperature:              293 K

|                        | Calculated     | Reported       |
|------------------------|----------------|----------------|
| Volume                 | 3634.35 (18)   | 3634.36 (17)   |
| Space group            | C 2/c          | C 1 2/c 1      |
| Hall group             | -C 2yc         | -C 2yc         |
| Moiety formula         | C20 H19 N O4 S | C20 H19 N O4 S |
| Sum formula            | C20 H19 N O4 S | C20 H19 N O4 S |
| Mr                     | 369.42         | 369.42         |
| Dx, g cm <sup>-3</sup> | 1.350          | 1.350          |
| Z                      | 8              | 8              |
| Mu (mm <sup>-1</sup> ) | 1.798          | 1.798          |
| F000                   | 1552.0         | 1552.0         |
| F000'                  | 1559.20        |                |
| h, k, lmax             | 34, 10, 17     | 34, 10, 17     |
| Nref                   | 3213           | 3210           |
| Tmin, Tmax             | 0.879, 0.931   | 0.515, 1.000   |
| Tmin'                  | 0.764          |                |

Correction method= # Reported T Limits: Tmin=0.515 Tmax=1.000  
AbsCorr = MULTI-SCAN

Data completeness= 0.999                      Theta (max)= 66.584

R(reflections)= 0.0451 ( 2374)

wR2(reflections)=  
0.1403 ( 3210)

S = 1.037

Npar= 238

---

The following ALERTS were generated. Each ALERT has the format

**test-name\_ALERT\_alert-type\_alert-level.**

Click on the hyperlinks for more details of the test.

---

 **Alert level C**

PLAT911\_ALERT\_3\_C Missing FCF Refl Between Thmin & STh/L= 0.595 3 Report  
-8 10 3, -1 1 3, 4 4 15,

---

 **Alert level G**

PLAT012\_ALERT\_1\_G No \_shelx\_res\_checksum Found in CIF ..... Please Check  
PLAT199\_ALERT\_1\_G Reported \_cell\_measurement\_temperature ..... (K) 293 Check  
PLAT200\_ALERT\_1\_G Reported \_diffrn\_ambient\_temperature ..... (K) 293 Check  
PLAT909\_ALERT\_3\_G Percentage of I>2sig(I) Data at Theta(Max) Still 46% Note  
PLAT933\_ALERT\_2\_G Number of HKL-OMIT Records in Embedded .res File 1 Note  
-1 1 3,  
PLAT969\_ALERT\_5\_G The 'Henn et al.' R-Factor-gap value ..... 2.863 Note  
Predicted wR2: Based on SigI\*\*2 4.90 or SHELX Weight 13.54  
PLAT978\_ALERT\_2\_G Number C-C Bonds with Positive Residual Density. 3 Info

---

- 0 **ALERT level A** = Most likely a serious problem - resolve or explain  
0 **ALERT level B** = A potentially serious problem, consider carefully  
1 **ALERT level C** = Check. Ensure it is not caused by an omission or oversight  
7 **ALERT level G** = General information/check it is not something unexpected
- 3 ALERT type 1 CIF construction/syntax error, inconsistent or missing data  
2 ALERT type 2 Indicator that the structure model may be wrong or deficient  
2 ALERT type 3 Indicator that the structure quality may be low  
0 ALERT type 4 Improvement, methodology, query or suggestion  
1 ALERT type 5 Informative message, check
- 
-

It is advisable to attempt to resolve as many as possible of the alerts in all categories. Often the minor alerts point to easily fixed oversights, errors and omissions in your CIF or refinement strategy, so attention to these fine details can be worthwhile. In order to resolve some of the more serious problems it may be necessary to carry out additional measurements or structure refinements. However, the purpose of your study may justify the reported deviations and the more serious of these should normally be commented upon in the discussion or experimental section of a paper or in the "special\_details" fields of the CIF. checkCIF was carefully designed to identify outliers and unusual parameters, but every test has its limitations and alerts that are not important in a particular case may appear. Conversely, the absence of alerts does not guarantee there are no aspects of the results needing attention. It is up to the individual to critically assess their own results and, if necessary, seek expert advice.

### **Publication of your CIF in IUCr journals**

A basic structural check has been run on your CIF. These basic checks will be run on all CIFs submitted for publication in IUCr journals (*Acta Crystallographica*, *Journal of Applied Crystallography*, *Journal of Synchrotron Radiation*); however, if you intend to submit to *Acta Crystallographica Section C* or *E* or *IUCrData*, you should make sure that full publication checks are run on the final version of your CIF prior to submission.

### **Publication of your CIF in other journals**

Please refer to the *Notes for Authors* of the relevant journal for any special instructions relating to CIF submission.

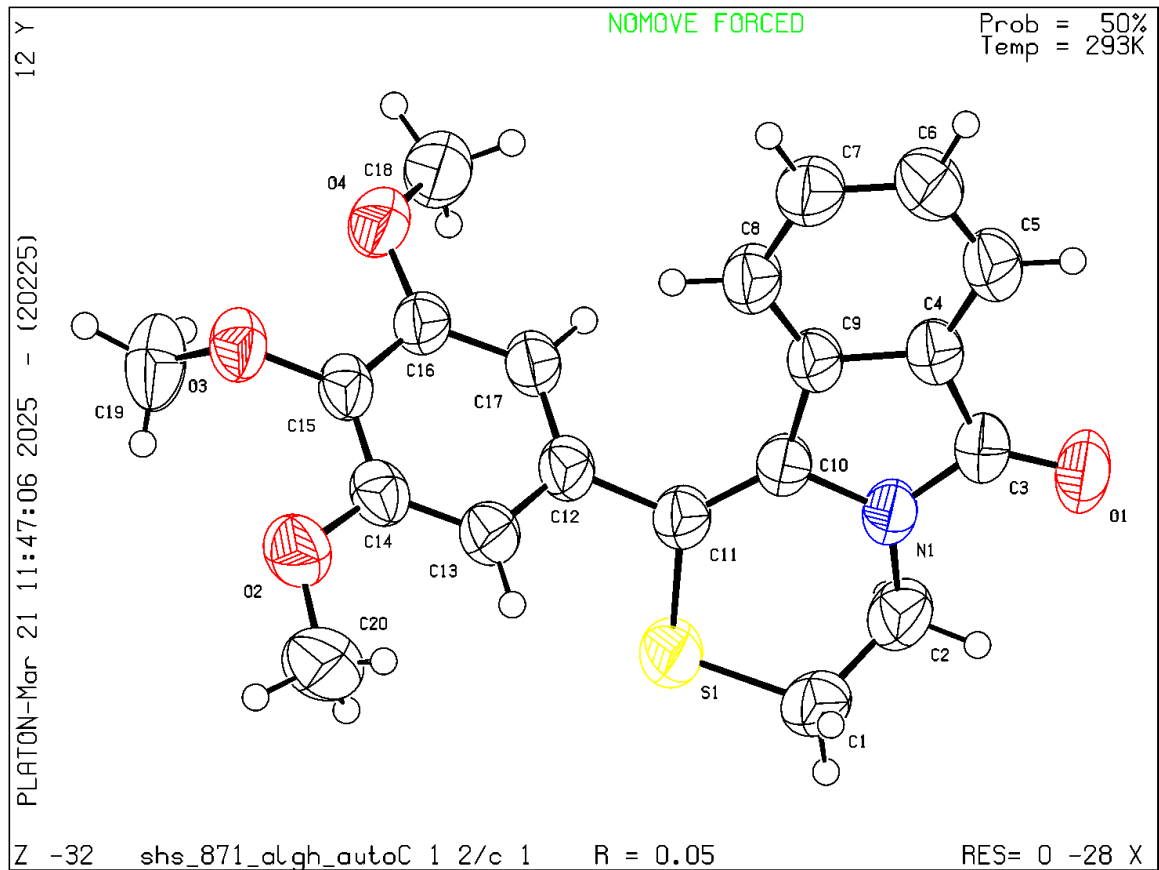

## checkCIF/PLATON report

Structure factors have been supplied for datablock(s) shi\_6529\_algh\_autored

THIS REPORT IS FOR GUIDANCE ONLY. IF USED AS PART OF A REVIEW PROCEDURE FOR PUBLICATION, IT SHOULD NOT REPLACE THE EXPERTISE OF AN EXPERIENCED CRYSTALLOGRAPHIC REFEREE.

No syntax errors found.      CIF dictionary      Interpreting this report

### Datablock: shi\_6529\_algh\_autored (Product 8f)

---

Bond precision:      C-C = 0.0041 A      Wavelength=0.71073

Cell:                      a=9.2246 (4)      b=9.9792 (5)      c=38.1166 (18)  
                                    alpha=90      beta=90      gamma=90

Temperature:              293 K

|                        | Calculated    | Reported      |
|------------------------|---------------|---------------|
| Volume                 | 3508.8 (3)    | 3508.8 (3)    |
| Space group            | P b c a       | P b c a       |
| Hall group             | -P 2ac 2ab    | -P 2ac 2ab    |
| Moiety formula         | C23 H17 N O S | C23 H17 N O S |
| Sum formula            | C23 H17 N O S | C23 H17 N O S |
| Mr                     | 355.44        | 355.43        |
| Dx, g cm <sup>-3</sup> | 1.346         | 1.346         |
| Z                      | 8             | 8             |
| Mu (mm <sup>-1</sup> ) | 0.196         | 0.196         |
| F000                   | 1488.0        | 1488.0        |
| F000'                  | 1489.53       |               |
| h, k, lmax             | 10, 11, 45    | 10, 11, 45    |
| Nref                   | 3090          | 3088          |
| Tmin, Tmax             | 0.988, 0.990  |               |
| Tmin'                  | 0.981         |               |

Correction method= Not given

Data completeness= 0.999      Theta (max)= 25.027

R(reflections)= 0.0582 ( 2286)

wR2(reflections)=  
0.1205 ( 3088)

S = 1.090

Npar= 236

---

The following ALERTS were generated. Each ALERT has the format

**test-name\_ALERT\_alert-type\_alert-level.**

Click on the hyperlinks for more details of the test.

---

**Alert level C**

|                   |                                                 |           |              |
|-------------------|-------------------------------------------------|-----------|--------------|
| PLAT052_ALERT_1_C | Info on Absorption Correction Method            | Not Given | Please Do !  |
| PLAT230_ALERT_2_C | Hirshfeld Test Diff for N1                      | --C2      | 6.5 s.u.     |
| PLAT340_ALERT_3_C | Low Bond Precision on C-C Bonds .....           |           | 0.00408 Ang. |
| PLAT906_ALERT_3_C | Large K Value in the Analysis of Variance ..... |           | 16.890 Check |
| PLAT906_ALERT_3_C | Large K Value in the Analysis of Variance ..... |           | 2.744 Check  |

---

**Alert level G**

|                   |                                                      |       |            |
|-------------------|------------------------------------------------------|-------|------------|
| PLAT199_ALERT_1_G | Reported _cell_measurement_temperature .....         | (K)   | 293 Check  |
| PLAT200_ALERT_1_G | Reported _diffrn_ambient_temperature .....           | (K)   | 293 Check  |
| PLAT909_ALERT_3_G | Percentage of I>2sig(I) Data at Theta(Max) Still     |       | 48% Note   |
| PLAT910_ALERT_3_G | Missing # of FCF Reflection(s) Below Theta(Min).     |       | 1 Note     |
|                   | 0 0 2,                                               |       |            |
| PLAT933_ALERT_2_G | Number of HKL-OMIT Records in Embedded .res File     |       | 1 Note     |
|                   | 2 7 24,                                              |       |            |
| PLAT969_ALERT_5_G | The 'Henn et al.' R-Factor-gap value .....           |       | 2.772 Note |
|                   | Predicted wR2: Based on SigI**2 4.35 or SHELX Weight | 11.05 |            |
| PLAT978_ALERT_2_G | Number C-C Bonds with Positive Residual Density.     |       | 0 Info     |

---

0 **ALERT level A** = Most likely a serious problem - resolve or explain  
0 **ALERT level B** = A potentially serious problem, consider carefully  
5 **ALERT level C** = Check. Ensure it is not caused by an omission or oversight  
7 **ALERT level G** = General information/check it is not something unexpected

3 ALERT type 1 CIF construction/syntax error, inconsistent or missing data  
3 ALERT type 2 Indicator that the structure model may be wrong or deficient  
5 ALERT type 3 Indicator that the structure quality may be low  
0 ALERT type 4 Improvement, methodology, query or suggestion  
1 ALERT type 5 Informative message, check

---

---

It is advisable to attempt to resolve as many as possible of the alerts in all categories. Often the minor alerts point to easily fixed oversights, errors and omissions in your CIF or refinement strategy, so attention to these fine details can be worthwhile. In order to resolve some of the more serious problems it may be necessary to carry out additional measurements or structure refinements. However, the purpose of your study may justify the reported deviations and the more serious of these should normally be commented upon in the discussion or experimental section of a paper or in the "special\_details" fields of the CIF. checkCIF was carefully designed to identify outliers and unusual parameters, but every test has its limitations and alerts that are not important in a particular case may appear. Conversely, the absence of alerts does not guarantee there are no aspects of the results needing attention. It is up to the individual to critically assess their own results and, if necessary, seek expert advice.

### **Publication of your CIF in IUCr journals**

A basic structural check has been run on your CIF. These basic checks will be run on all CIFs submitted for publication in IUCr journals (*Acta Crystallographica*, *Journal of Applied Crystallography*, *Journal of Synchrotron Radiation*); however, if you intend to submit to *Acta Crystallographica Section C* or *E* or *IUCrData*, you should make sure that full publication checks are run on the final version of your CIF prior to submission.

### **Publication of your CIF in other journals**

Please refer to the *Notes for Authors* of the relevant journal for any special instructions relating to CIF submission.

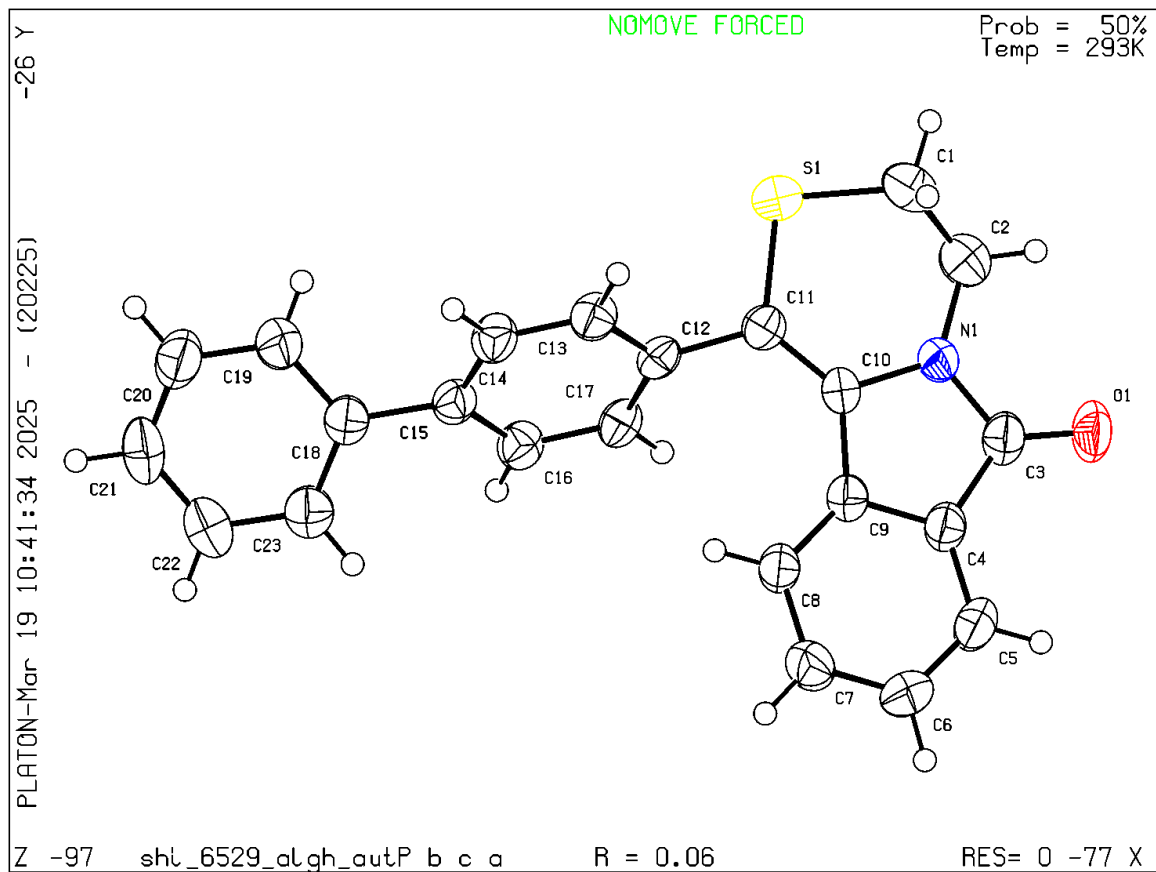



---

The following ALERTS were generated. Each ALERT has the format

**test-name\_ALERT\_alert-type\_alert-level.**

Click on the hyperlinks for more details of the test.

---

**Alert level B**

PLAT029\_ALERT\_3\_B \_diffrn\_measured\_fraction\_theta\_full value Low . 0.954 Why?

---

**Alert level C**

PLAT230\_ALERT\_2\_C Hirshfeld Test Diff for C19 --C20 . 5.7 s.u.  
PLAT340\_ALERT\_3\_C Low Bond Precision on C-C Bonds ..... 0.00641 Ang.  
PLAT906\_ALERT\_3\_C Large K Value in the Analysis of Variance ..... 5.455 Check  
PLAT911\_ALERT\_3\_C Missing FCF Refl Between Thmin & STh/L= 0.595 125 Report

|    |    |    |    |    |    |    |    |    |    |    |    |    |    |    |    |    |    |
|----|----|----|----|----|----|----|----|----|----|----|----|----|----|----|----|----|----|
| 4  | 3  | 0, | 4  | 28 | 0, | 0  | 30 | 0, | 0  | 32 | 0, | -3 | 28 | 1, | -1 | 30 | 1, |
| 0  | 11 | 2, | 4  | 12 | 2, | -4 | 24 | 2, | -5 | 26 | 2, | -5 | 27 | 2, | -3 | 9  | 3, |
| 4  | 16 | 3, | 5  | 16 | 3, | 4  | 17 | 3, | 5  | 17 | 3, | 3  | 18 | 3, | 5  | 18 | 3, |
| 4  | 20 | 3, | 3  | 21 | 3, | 4  | 21 | 3, | -5 | 23 | 3, | -6 | 24 | 3, | -6 | 3  | 4, |
| 4  | 11 | 4, | -5 | 22 | 4, | 3  | 0  | 5, | 2  | 1  | 5, | 4  | 1  | 5, | 4  | 2  | 5, |
| 4  | 3  | 5, | 4  | 4  | 5, | 4  | 8  | 5, | 4  | 9  | 5, | 4  | 10 | 5, | 4  | 11 | 5, |
| 4  | 13 | 5, | 4  | 14 | 5, | -4 | 19 | 5, | -5 | 21 | 5, | 4  | 0  | 6, | 2  | 1  | 6, |
| 3  | 1  | 6, | 3  | 2  | 6, | 3  | 3  | 6, | 2  | 4  | 6, | 3  | 4  | 6, | 3  | 5  | 6, |
| 3  | 6  | 6, | 3  | 8  | 6, | 3  | 9  | 6, | -8 | 12 | 6, | -1 | 13 | 6, | -6 | 16 | 6, |
| -7 | 18 | 6, | -6 | 19 | 6, | 0  | 24 | 6, | -6 | 1  | 7, | 2  | 1  | 7, | -6 | 2  | 7, |
| 2  | 2  | 7, | 2  | 3  | 7, | -6 | 4  | 7, | 2  | 4  | 7, | 2  | 5  | 7, | 1  | 6  | 7, |
| 2  | 6  | 7, | 1  | 7  | 7, | 1  | 8  | 7, | -2 | 11 | 7, | -2 | 12 | 7, | -7 | 13 | 7, |
| -6 | 13 | 7, | -2 | 13 | 7, | -6 | 14 | 7, | -3 | 14 | 7, | -3 | 15 | 7, | -2 | 15 | 7, |
| -3 | 16 | 7, | -2 | 16 | 7, | -3 | 18 | 7, | -3 | 19 | 7, | -4 | 20 | 7, | -3 | 20 | 7, |
| -5 | 21 | 7, | -4 | 21 | 7, | -3 | 21 | 7, | -4 | 22 | 7, | -6 | 0  | 8, | 0  | 0  | 8, |
| -6 | 1  | 8, | 1  | 1  | 8, | 1  | 5  | 8, | 0  | 6  | 8, | 1  | 6  | 8, | 1  | 7  | 8, |

---

**Alert level G**

PLAT083\_ALERT\_2\_G SHELXL Second Parameter in WGHT Unusually Large 7.89 Why ?  
PLAT909\_ALERT\_3\_G Percentage of I>2sig(I) Data at Theta(Max) Still 73% Note  
PLAT933\_ALERT\_2\_G Number of HKL-OMIT Records in Embedded .res File 26 Note

|    |    |    |    |    |    |    |    |    |    |    |    |    |    |    |    |    |    |
|----|----|----|----|----|----|----|----|----|----|----|----|----|----|----|----|----|----|
| -6 | 2  | 7, | -6 | 3  | 4, | -6 | 4  | 7, | -6 | 16 | 6, | -6 | 19 | 6, | -6 | 24 | 3, |
| -5 | 21 | 5, | -5 | 22 | 4, | -5 | 23 | 3, | -4 | 19 | 5, | -3 | 9  | 3, | -3 | 28 | 1, |
| -2 | 8  | 9, | -1 | 13 | 6, | 0  | 6  | 8, | 0  | 11 | 2, | 2  | 1  | 6, | 2  | 4  | 6, |
| 3  | 4  | 6, | 3  | 8  | 6, | 3  | 18 | 3, | 3  | 21 | 3, | 4  | 3  | 0, | 4  | 11 | 4, |
| 4  | 12 | 2, | 5  | 17 | 3, |    |    |    |    |    |    |    |    |    |    |    |    |

PLAT941\_ALERT\_3\_G Average HKL Measurement Multiplicity ..... 4.1 Low  
PLAT969\_ALERT\_5\_G The 'Henn et al.' R-Factor-gap value ..... 6.812 Note  
Predicted wR2: Based on SigI\*\*2 2.63 or SHELX Weight 16.45  
PLAT978\_ALERT\_2\_G Number C-C Bonds with Positive Residual Density. 3 Info

---

- 0 **ALERT level A** = Most likely a serious problem - resolve or explain
- 1 **ALERT level B** = A potentially serious problem, consider carefully
- 4 **ALERT level C** = Check. Ensure it is not caused by an omission or oversight
- 6 **ALERT level G** = General information/check it is not something unexpected

0 ALERT type 1 CIF construction/syntax error, inconsistent or missing data

4 ALERT type 2 Indicator that the structure model may be wrong or deficient  
6 ALERT type 3 Indicator that the structure quality may be low  
0 ALERT type 4 Improvement, methodology, query or suggestion  
1 ALERT type 5 Informative message, check

---

---

It is advisable to attempt to resolve as many as possible of the alerts in all categories. Often the minor alerts point to easily fixed oversights, errors and omissions in your CIF or refinement strategy, so attention to these fine details can be worthwhile. In order to resolve some of the more serious problems it may be necessary to carry out additional measurements or structure refinements. However, the purpose of your study may justify the reported deviations and the more serious of these should normally be commented upon in the discussion or experimental section of a paper or in the "special\_details" fields of the CIF. checkCIF was carefully designed to identify outliers and unusual parameters, but every test has its limitations and alerts that are not important in a particular case may appear. Conversely, the absence of alerts does not guarantee there are no aspects of the results needing attention. It is up to the individual to critically assess their own results and, if necessary, seek expert advice.

#### **Publication of your CIF in IUCr journals**

A basic structural check has been run on your CIF. These basic checks will be run on all CIFs submitted for publication in IUCr journals (*Acta Crystallographica*, *Journal of Applied Crystallography*, *Journal of Synchrotron Radiation*); however, if you intend to submit to *Acta Crystallographica Section C* or *E* or *IUCrData*, you should make sure that full publication checks are run on the final version of your CIF prior to submission.

#### **Publication of your CIF in other journals**

Please refer to the *Notes for Authors* of the relevant journal for any special instructions relating to CIF submission.

---

**PLATON version of 02/02/2025; check.def file version of 02/02/2025**

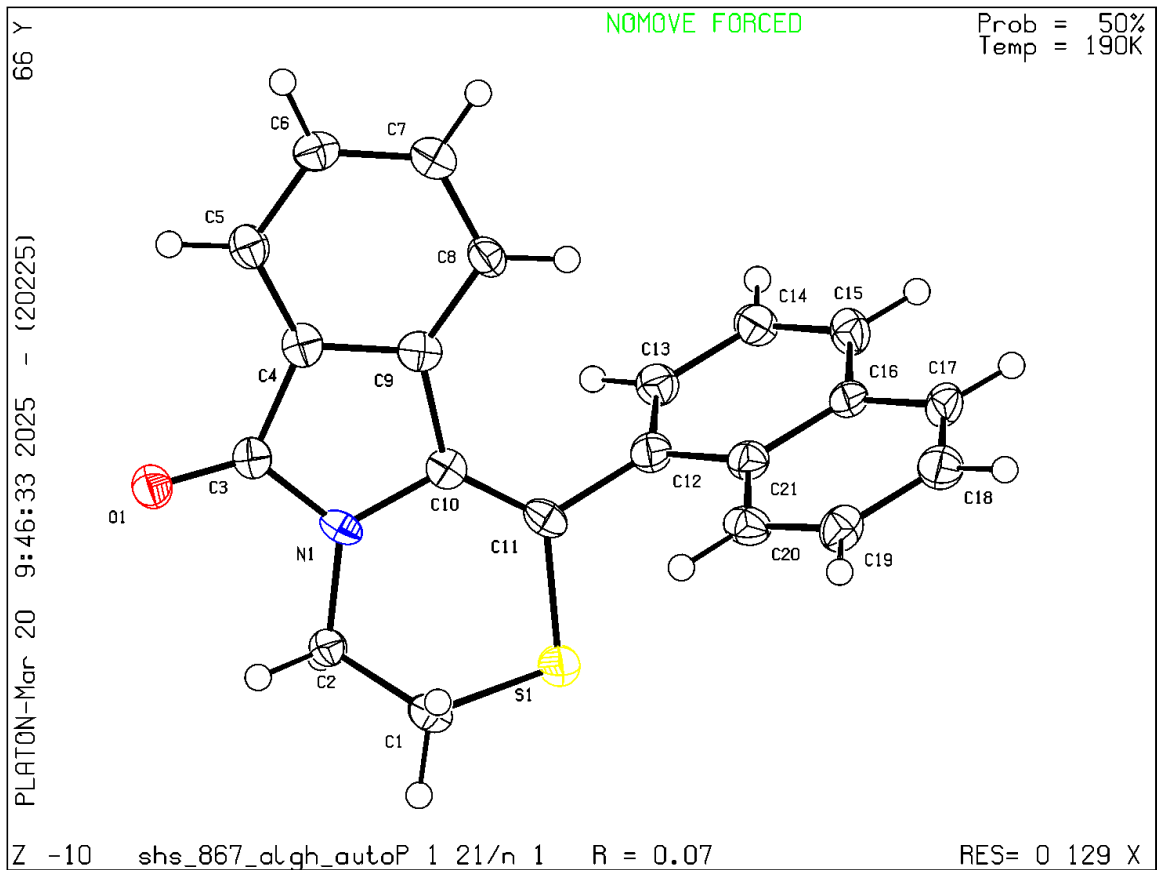

## checkCIF/PLATON report

Structure factors have been supplied for datablock(s) shs\_869\_algh\_auto

THIS REPORT IS FOR GUIDANCE ONLY. IF USED AS PART OF A REVIEW PROCEDURE FOR PUBLICATION, IT SHOULD NOT REPLACE THE EXPERTISE OF AN EXPERIENCED CRYSTALLOGRAPHIC REFEREE.

No syntax errors found.      CIF dictionary      Interpreting this report

### Datablock: shs\_869\_algh\_auto (Product 8i)

---

Bond precision:      C-C = 0.0029 Å      Wavelength=1.54184

Cell:                      a=6.0141 (1)              b=24.4546 (3)              c=13.3223 (2)  
                                    alpha=90              beta=91.490 (1)              gamma=90

Temperature:              293 K

|                        | Calculated    | Reported      |
|------------------------|---------------|---------------|
| Volume                 | 1958.68 (5)   | 1958.68 (5)   |
| Space group            | P 21/n        | P 1 21/n 1    |
| Hall group             | -P 2yn        | -P 2yn        |
| Moiety formula         | C27 H17 N O S | C27 H17 N O S |
| Sum formula            | C27 H17 N O S | C27 H17 N O S |
| Mr                     | 403.48        | 403.48        |
| Dx, g cm <sup>-3</sup> | 1.368         | 1.368         |
| Z                      | 4             | 4             |
| Mu (mm <sup>-1</sup> ) | 1.610         | 1.610         |
| F000                   | 840.0         | 840.0         |
| F000'                  | 843.50        |               |
| h, k, lmax             | 7, 29, 15     | 7, 29, 15     |
| Nref                   | 3449          | 3438          |
| Tmin, Tmax             | 0.926, 0.938  | 0.965, 1.000  |
| Tmin'                  | 0.879         |               |

Correction method= # Reported T Limits: Tmin=0.965 Tmax=1.000  
AbsCorr = MULTI-SCAN

Data completeness= 0.997                      Theta(max)= 66.591

R(reflections)= 0.0418 ( 3023)

wR2(reflections)=  
0.1197 ( 3438)

S = 1.034

Npar= 275

---

The following ALERTS were generated. Each ALERT has the format

**test-name\_ALERT\_alert-type\_alert-level.**

Click on the hyperlinks for more details of the test.

---

● **Alert level C**

|                   |                                                 |                                           |          |           |           |        |
|-------------------|-------------------------------------------------|-------------------------------------------|----------|-----------|-----------|--------|
| PLAT241_ALERT_2_C | High                                            | 'MainMol' Ueq as Compared to Neighbors of | C2       | Check     |           |        |
| PLAT906_ALERT_3_C | Large K Value in the Analysis of Variance ..... |                                           | 2.252    | Check     |           |        |
| PLAT911_ALERT_3_C | Missing FCF Refl Between Thmin & STh/L=         | 0.595                                     |          | 11 Report |           |        |
|                   | 1 3 0,                                          | 2 4 0,                                    | 1 5 0,   | 1 11 0,   | -3 4 1,   | 1 6 2, |
|                   | 1 2 4,                                          | 1 9 4,                                    | -1 10 4, | -2 0 8,   | -1 22 10, |        |

---

● **Alert level G**

|                   |                                                  |                                        |                 |        |              |        |
|-------------------|--------------------------------------------------|----------------------------------------|-----------------|--------|--------------|--------|
| PLAT002_ALERT_2_G | Number of Distance or Angle Restraints on AtSite |                                        |                 | 4      | Note         |        |
| PLAT012_ALERT_1_G | No                                               | _shelx_res_checksum Found in CIF ..... |                 |        | Please Check |        |
| PLAT171_ALERT_4_G | The CIF-Embedded .res File Contains EADP Records |                                        |                 | 1      | Report       |        |
| PLAT176_ALERT_4_G | The CIF-Embedded .res File Contains SADI Records |                                        |                 | 2      | Report       |        |
| PLAT191_ALERT_3_G | A Non-default SADI Restraint Value has been used |                                        | 0.0100          |        | Report       |        |
| PLAT191_ALERT_3_G | A Non-default SADI Restraint Value has been used |                                        | 0.0100          |        | Report       |        |
| PLAT199_ALERT_1_G | Reported _cell_measurement_temperature .....     | (K)                                    |                 | 293    | Check        |        |
| PLAT200_ALERT_1_G | Reported _diffrn_ambient_temperature .....       | (K)                                    |                 | 293    | Check        |        |
| PLAT230_ALERT_2_G | Hirshfeld Test Diff for                          | C1                                     | --C2            |        | 6.3 s.u.     |        |
| PLAT301_ALERT_3_G | Main Residue Disorder .....                      | (Resd                                  | 1)              |        | 3% Note      |        |
| PLAT720_ALERT_4_G | Number of Unusual/Non-Standard Labels .....      |                                        |                 |        | 6 Note       |        |
|                   | H2AA                                             | H2AB                                   | H2BC            | H2BD   | H1XA         | H1XB   |
| PLAT860_ALERT_3_G | Number of Least-Squares Restraints .....         |                                        |                 |        | 2            | Note   |
| PLAT909_ALERT_3_G | Percentage of I>2sig(I) Data at Theta(Max) Still |                                        |                 | 76%    |              | Note   |
| PLAT933_ALERT_2_G | Number of HKL-OMIT Records in Embedded .res File |                                        |                 |        | 10           | Note   |
|                   | -3 4 1,                                          | -2 0 8,                                | -1 10 4,        | 1 2 4, | 1 3 0,       | 1 5 0, |
|                   | 1 6 2,                                           | 1 9 4,                                 | 1 11 0,         | 2 4 0, |              |        |
| PLAT941_ALERT_3_G | Average HKL Measurement Multiplicity .....       |                                        |                 | 3.7    |              | Low    |
| PLAT969_ALERT_5_G | The 'Henn et al.' R-Factor-gap value .....       |                                        |                 | 6.577  |              | Note   |
|                   | Predicted wR2: Based on SigI**2                  | 1.82                                   | or SHELX Weight | 11.58  |              |        |
| PLAT978_ALERT_2_G | Number C-C Bonds with Positive Residual Density. |                                        |                 |        | 9            | Info   |
| PLAT992_ALERT_5_G | Repd & Actual _reflns_number_gt Values Differ by |                                        |                 |        | 6            | Check  |

---

0 **ALERT level A** = Most likely a serious problem - resolve or explain  
0 **ALERT level B** = A potentially serious problem, consider carefully  
3 **ALERT level C** = Check. Ensure it is not caused by an omission or oversight  
18 **ALERT level G** = General information/check it is not something unexpected

3 ALERT type 1 CIF construction/syntax error, inconsistent or missing data  
5 ALERT type 2 Indicator that the structure model may be wrong or deficient  
8 ALERT type 3 Indicator that the structure quality may be low  
3 ALERT type 4 Improvement, methodology, query or suggestion  
2 ALERT type 5 Informative message, check

---

It is advisable to attempt to resolve as many as possible of the alerts in all categories. Often the minor alerts point to easily fixed oversights, errors and omissions in your CIF or refinement strategy, so attention to these fine details can be worthwhile. In order to resolve some of the more serious problems it may be necessary to carry out additional measurements or structure refinements. However, the purpose of your study may justify the reported deviations and the more serious of these should normally be commented upon in the discussion or experimental section of a paper or in the "special\_details" fields of the CIF. checkCIF was carefully designed to identify outliers and unusual parameters, but every test has its limitations and alerts that are not important in a particular case may appear. Conversely, the absence of alerts does not guarantee there are no aspects of the results needing attention. It is up to the individual to critically assess their own results and, if necessary, seek expert advice.

### **Publication of your CIF in IUCr journals**

A basic structural check has been run on your CIF. These basic checks will be run on all CIFs submitted for publication in IUCr journals (*Acta Crystallographica*, *Journal of Applied Crystallography*, *Journal of Synchrotron Radiation*); however, if you intend to submit to *Acta Crystallographica Section C* or *E* or *IUCrData*, you should make sure that full publication checks are run on the final version of your CIF prior to submission.

### **Publication of your CIF in other journals**

Please refer to the *Notes for Authors* of the relevant journal for any special instructions relating to CIF submission.

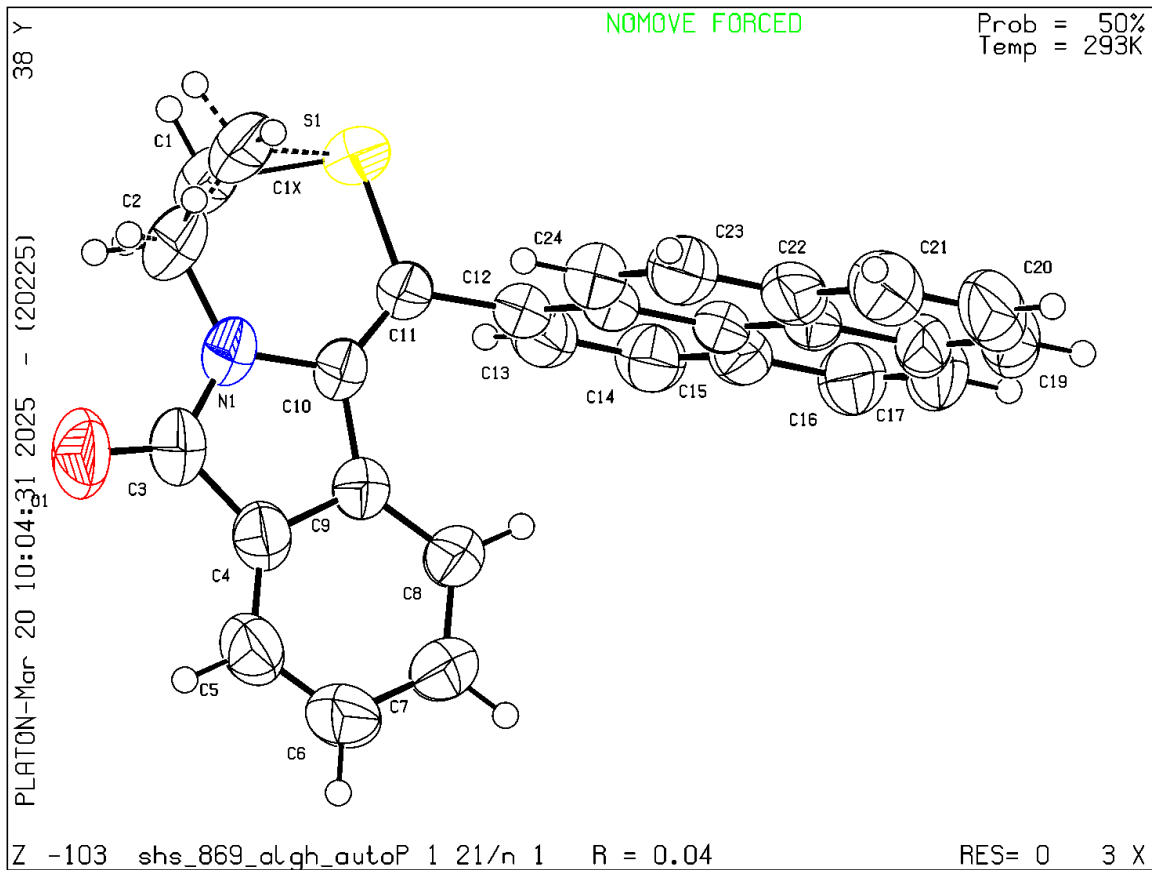



---

The following ALERTS were generated. Each ALERT has the format

**test-name\_ALERT\_alert-type\_alert-level.**

Click on the hyperlinks for more details of the test.

---

● **Alert level C**

PLAT340\_ALERT\_3\_C Low Bond Precision on C-C Bonds ..... 0.00405 Ang.  
PLAT911\_ALERT\_3\_C Missing FCF Refl Between Thmin & STh/L= 0.595 23 Report  
-3 -8 1, -9 2 1, -9 2 2, -4 8 3, -8 -5 4, -8 3 4,  
-8 4 4, -3 -7 5, 0 -7 6, 8 -1 6, -7 5 6, 7 1 7,  
-6 6 7, -1 -6 8, 3 -4 8, -7 4 8, 2 -5 9, 3 -4 9,  
4 4 10, 5 5 10, 3 -3 11, 3 8 11, 2 0 13,  
PLAT918\_ALERT\_3\_C Reflection(s) with I(obs) much Smaller I(calc) . 1 Check

---

● **Alert level G**

PLAT072\_ALERT\_2\_G SHELXL First Parameter in WGHT Unusually Large 0.15 Report  
PLAT154\_ALERT\_1\_G The s.u.'s on the Cell Angles are Equal ..(Note) 0.005 Degree  
PLAT199\_ALERT\_1\_G Reported \_cell\_measurement\_temperature ..... (K) 293 Check  
PLAT200\_ALERT\_1\_G Reported \_diffrn\_ambient\_temperature ..... (K) 293 Check  
PLAT909\_ALERT\_3\_G Percentage of I>2sig(I) Data at Theta(Max) Still 73% Note  
PLAT941\_ALERT\_3\_G Average HKL Measurement Multiplicity ..... 3.1 Low  
PLAT969\_ALERT\_5\_G The 'Henn et al.' R-Factor-gap value ..... 4.211 Note  
Predicted wR2: Based on SigI\*\*2 5.11 or SHELX Weight 19.99  
PLAT978\_ALERT\_2\_G Number C-C Bonds with Positive Residual Density. 1 Info

---

0 **ALERT level A** = Most likely a serious problem - resolve or explain  
0 **ALERT level B** = A potentially serious problem, consider carefully  
3 **ALERT level C** = Check. Ensure it is not caused by an omission or oversight  
8 **ALERT level G** = General information/check it is not something unexpected

3 ALERT type 1 CIF construction/syntax error, inconsistent or missing data  
2 ALERT type 2 Indicator that the structure model may be wrong or deficient  
5 ALERT type 3 Indicator that the structure quality may be low  
0 ALERT type 4 Improvement, methodology, query or suggestion  
1 ALERT type 5 Informative message, check

---

---

It is advisable to attempt to resolve as many as possible of the alerts in all categories. Often the minor alerts point to easily fixed oversights, errors and omissions in your CIF or refinement strategy, so attention to these fine details can be worthwhile. In order to resolve some of the more serious problems it may be necessary to carry out additional measurements or structure refinements. However, the purpose of your study may justify the reported deviations and the more serious of these should normally be commented upon in the discussion or experimental section of a paper or in the "special\_details" fields of the CIF. checkCIF was carefully designed to identify outliers and unusual parameters, but every test has its limitations and alerts that are not important in a particular case may appear. Conversely, the absence of alerts does not guarantee there are no aspects of the results needing attention. It is up to the individual to critically assess their own results and, if necessary, seek expert advice.

### **Publication of your CIF in IUCr journals**

A basic structural check has been run on your CIF. These basic checks will be run on all CIFs submitted for publication in IUCr journals (*Acta Crystallographica*, *Journal of Applied Crystallography*, *Journal of Synchrotron Radiation*); however, if you intend to submit to *Acta Crystallographica Section C* or *E* or *IUCrData*, you should make sure that full publication checks are run on the final version of your CIF prior to submission.

### **Publication of your CIF in other journals**

Please refer to the *Notes for Authors* of the relevant journal for any special instructions relating to CIF submission.

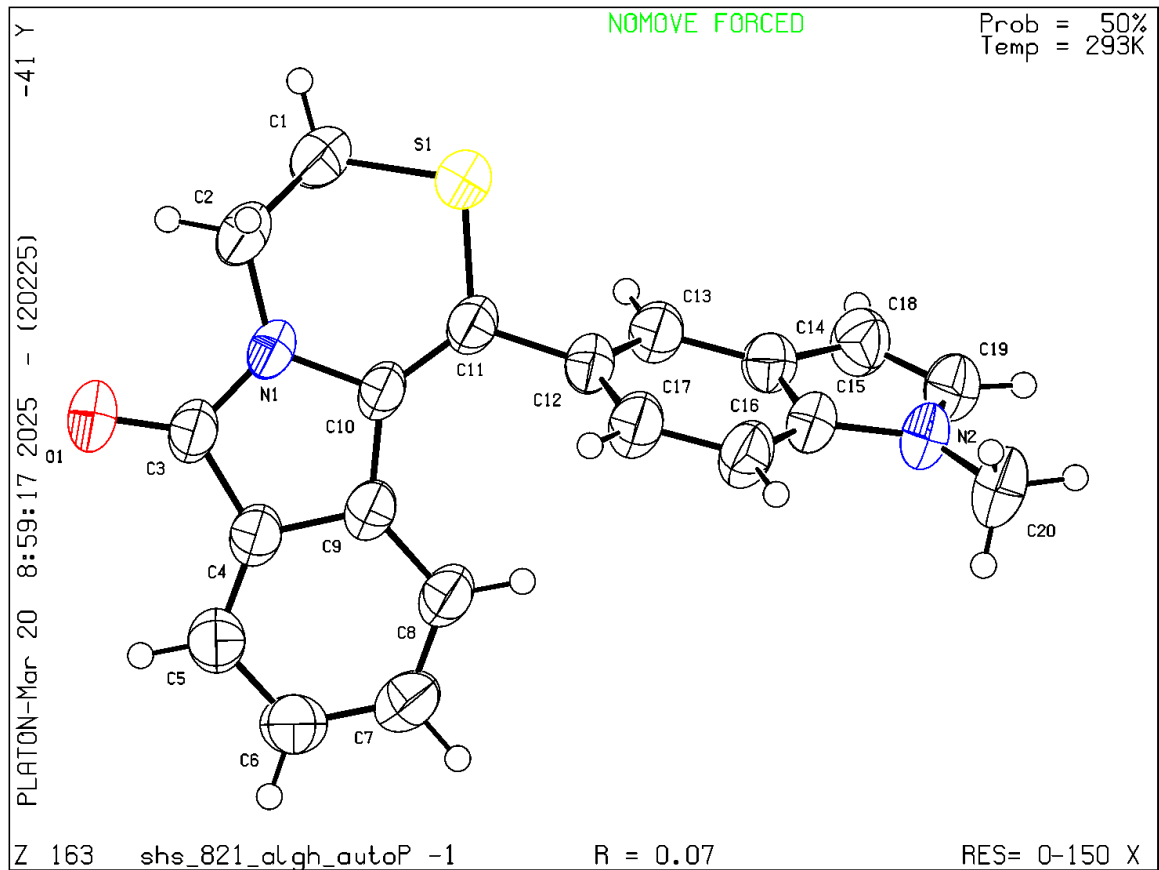

## checkCIF/PLATON report

Structure factors have been supplied for datablock(s) shs\_870\_algh\_auto

THIS REPORT IS FOR GUIDANCE ONLY. IF USED AS PART OF A REVIEW PROCEDURE FOR PUBLICATION, IT SHOULD NOT REPLACE THE EXPERTISE OF AN EXPERIENCED CRYSTALLOGRAPHIC REFEREE.

No syntax errors found.      CIF dictionary      Interpreting this report

### Datablock: shs\_870\_algh\_auto (Product 8r)

---

Bond precision:    C-C = 0.0028 A                      Wavelength=1.54184

Cell:                a=10.85284(13)      b=10.61071(12)      c=11.79455(14)  
                      alpha=90            beta=100.8736(12)    gamma=90

Temperature:      293 K

|                        | Calculated      | Reported        |
|------------------------|-----------------|-----------------|
| Volume                 | 1333.83(3)      | 1333.83(3)      |
| Space group            | P 21/n          | P 1 21/n 1      |
| Hall group             | -P 2yn          | -P 2yn          |
| Moiety formula         | C15 H14 N2 O2 S | C15 H14 N2 O2 S |
| Sum formula            | C15 H14 N2 O2 S | C15 H14 N2 O2 S |
| Mr                     | 286.34          | 286.34          |
| Dx, g cm <sup>-3</sup> | 1.426           | 1.426           |
| Z                      | 4               | 4               |
| Mu (mm <sup>-1</sup> ) | 2.184           | 2.184           |
| F000                   | 600.0           | 600.0           |
| F000'                  | 602.97          |                 |
| h, k, lmax             | 12, 12, 14      | 12, 12, 14      |
| Nref                   | 2355            | 2323            |
| Tmin, Tmax             | 0.757, 0.721    | 0.739, 1.000    |
| Tmin'                  | 0.686           |                 |

Correction method= # Reported T Limits: Tmin=0.739 Tmax=1.000  
AbsCorr = MULTI-SCAN

Data completeness= 0.986                      Theta(max)= 66.598

R(reflections)= 0.0400( 2204)

wR2(reflections)=  
0.1087( 2323)

S = 1.061

Npar= 181

---

The following ALERTS were generated. Each ALERT has the format

**test-name\_ALERT\_alert-type\_alert-level.**

Click on the hyperlinks for more details of the test.

---

● **Alert level C**

PLAT241\_ALERT\_2\_C High 'MainMol' Ueq as Compared to Neighbors of C14 Check  
PLAT906\_ALERT\_3\_C Large K Value in the Analysis of Variance ..... 2.134 Check  
PLAT911\_ALERT\_3\_C Missing FCF Refl Between Thmin & STh/L= 0.595 31 Report  
12 0 0, 6 3 0, 0 12 0, -11 0 1, 11 0 1, -4 4 1,  
-2 4 1, -12 0 2, 10 0 2, 12 0 2, 4 11 2, 5 11 2,  
-11 0 3, 11 0 3, -12 0 4, 10 0 4, -2 12 4, -11 0 5,  
-12 0 6, -10 0 6, 10 0 6, -11 0 7, -10 0 8, -8 8 8,  
-11 0 9, -9 6 9, -10 0 10, 6 4 10, -3 0 11, -4 0 12,  
-3 0 13,

---

● **Alert level G**

PLAT012\_ALERT\_1\_G No \_shelx\_res\_checksum Found in CIF ..... Please Check  
PLAT199\_ALERT\_1\_G Reported \_cell\_measurement\_temperature ..... (K) 293 Check  
PLAT200\_ALERT\_1\_G Reported \_diffrn\_ambient\_temperature ..... (K) 293 Check  
PLAT909\_ALERT\_3\_G Percentage of I>2sig(I) Data at Theta(Max) Still 88% Note  
PLAT933\_ALERT\_2\_G Number of HKL-OMIT Records in Embedded .res File 2 Note  
-4 4 1, -2 4 1,  
PLAT955\_ALERT\_1\_G Reported (CIF) and Actual (FCF) Lmax Differ by . 1 Units  
PLAT969\_ALERT\_5\_G The 'Henn et al.' R-Factor-gap value ..... 6.864 Note  
Predicted wR2: Based on SigI\*\*2 1.58 or SHELX Weight 10.24  
PLAT978\_ALERT\_2\_G Number C-C Bonds with Positive Residual Density. 7 Info

---

- 0 **ALERT level A** = Most likely a serious problem - resolve or explain  
0 **ALERT level B** = A potentially serious problem, consider carefully  
3 **ALERT level C** = Check. Ensure it is not caused by an omission or oversight  
8 **ALERT level G** = General information/check it is not something unexpected
- 4 ALERT type 1 CIF construction/syntax error, inconsistent or missing data  
3 ALERT type 2 Indicator that the structure model may be wrong or deficient  
3 ALERT type 3 Indicator that the structure quality may be low  
0 ALERT type 4 Improvement, methodology, query or suggestion  
1 ALERT type 5 Informative message, check
- 
-

It is advisable to attempt to resolve as many as possible of the alerts in all categories. Often the minor alerts point to easily fixed oversights, errors and omissions in your CIF or refinement strategy, so attention to these fine details can be worthwhile. In order to resolve some of the more serious problems it may be necessary to carry out additional measurements or structure refinements. However, the purpose of your study may justify the reported deviations and the more serious of these should normally be commented upon in the discussion or experimental section of a paper or in the "special\_details" fields of the CIF. checkCIF was carefully designed to identify outliers and unusual parameters, but every test has its limitations and alerts that are not important in a particular case may appear. Conversely, the absence of alerts does not guarantee there are no aspects of the results needing attention. It is up to the individual to critically assess their own results and, if necessary, seek expert advice.

### **Publication of your CIF in IUCr journals**

A basic structural check has been run on your CIF. These basic checks will be run on all CIFs submitted for publication in IUCr journals (*Acta Crystallographica*, *Journal of Applied Crystallography*, *Journal of Synchrotron Radiation*); however, if you intend to submit to *Acta Crystallographica Section C* or *E* or *IUCrData*, you should make sure that full publication checks are run on the final version of your CIF prior to submission.

### **Publication of your CIF in other journals**

Please refer to the *Notes for Authors* of the relevant journal for any special instructions relating to CIF submission.

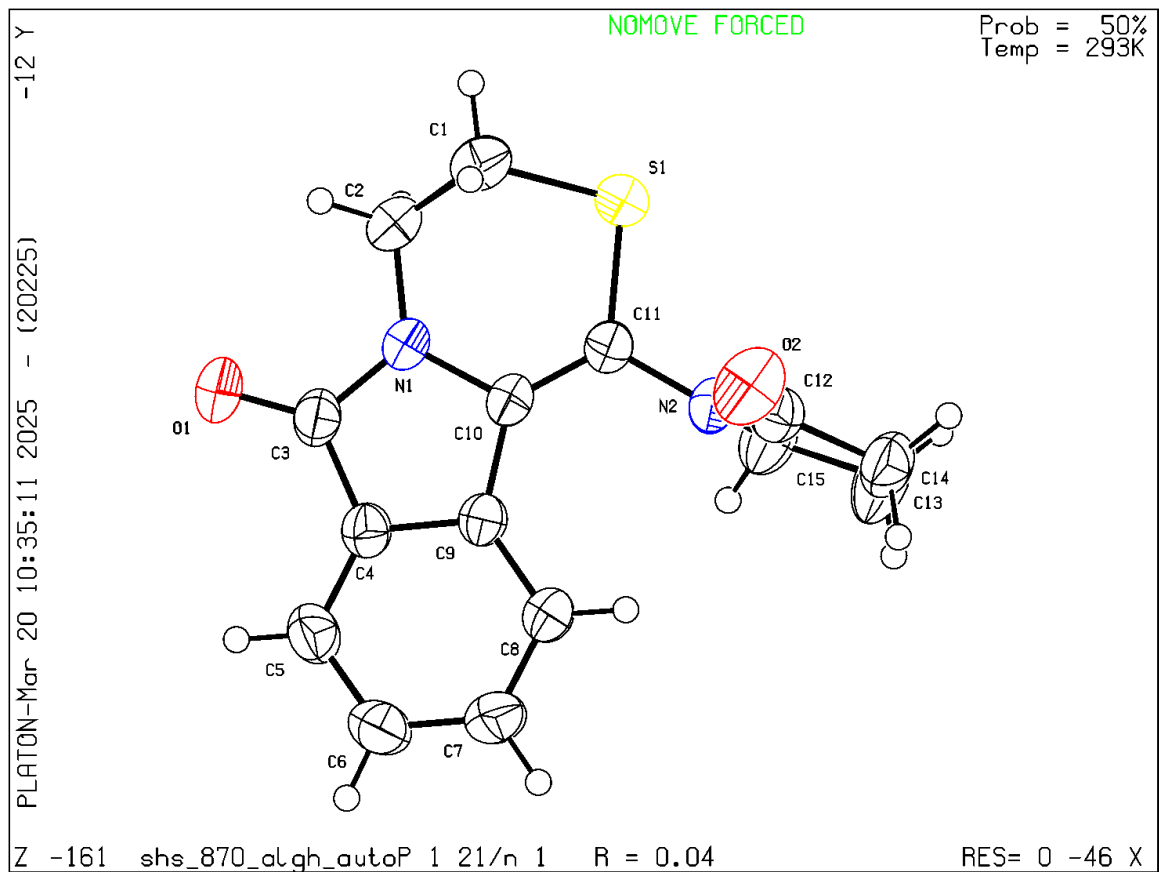

Supplement: d6ob00454g1.pdf [file d6ob00454g1.pdf]
